# Supplementary material for: Large-Scale Analysis of Combining Ability and Heterosis for Development of Hybrid Maize Breeding Strategies Using Diverse Germplasm Resources
Source: Front Plant Sci. 2020 Jun 1;11:660. doi: 10.3389/fpls.2020.00660 (PMC7278714; doi:10.3389/fpls.2020.00660)
Supplement: Supplementary file 4 [file Table_3.xlsx]

## Sheet: Sheet1
Table S3 Special combining ability, hybrid performance and heterosis for 11 tested traits in a maize multiple-hybrid population with 724 hybrids.
Population	Line	Cross	PH				EH				DTS				DTA				EL				ED				RN				GNPR				GNPE				HGW				GWPP
			SCA	Mean	MPH	HPH	SCA	Mean	MPH	HPH	SCA	Mean	MPH	HPH	SCA	Mean	MPH	HPH	SCA	Mean	MPH	HPH	SCA	Mean	MPH	HPH	SCA	Mean	MPH	HPH	SCA	Mean	MPH	HPH	SCA	Mean	MPH	HPH	SCA	Mean	MPH	HPH	SCA	Mean	MPH	HPH
Temperate diallel	P01×P02	NK764×AS6103	-0.840214	225.502	36.7166	32.261	-6.31155	88.8027	40.4385	39.0774	-0.15923	52.2097	-3.68298	-3.97121	0.039904	50.5868	-3.51886	-4.33914	0.360642	17.078	26.3175	19.5511	1.17355	44.2523	27.6677	18.65	-0.453632	15.193	5.67573	-2.8742	0.565709	33.0105	48.5441	37.9109	-5.60851	504.01	55.3292	34.8538	2.66486	28.4383	32.4393	31.4215	3.92598	104.37	121.373	97.8595
Temperate diallel	P01×P03	NK764×F42	10.3789	244.326	42.8311	33.7057	5.2416	106.816	60.848	52.154	-0.964441	53.0472	-5.88043	-9.09446	-0.0602392	51.884	-4.75718	-8.92559	0.582571	16.8924	39.8904	32.4406	1.07228	43.6046	28.8735	22.3381	0.0886707	16.1392	9.85848	-0.806372	1.17737	33.1187	59.3298	57.2349	19.7697	534.314	72.0141	54.4114	-1.69719	23.2668	8.15505	7.12895	7.9153	110.288	153.322	142.234
Temperate diallel	P01×P04	NK764×FAPW	-1.10378	233.924	34.7707	24.587	-1.67353	97.7823	41.1189	28.7155	-0.764936	53.7078	-7.12797	-12.3725	-0.734466	51.6957	-7.80084	-14.0654	0.156335	17.0935	31.5395	29.1516	0.967524	43.613	25.8529	16.987	0.352024	15.8961	13.0663	5.92598	-0.166763	32.2144	43.3038	31.7546	2.48814	507.702	56.8865	36.4752	0.592766	26.6774	21.0359	17.1325	-0.0257515	101.412	121.923	103.436
Temperate diallel	P01×P05	NK764×LH51	-6.52154	230.031	39.2381	34.4978	1.69024	90.1326	81.647	43.9505	1.30435	54.2417	-1.82898	-3.37397	0.947225	51.656	-1.84254	-3.02821	-0.9796	17.2162	37.52	34.9793	-0.563535	41.0822	30.1839	28.2708	-0.15759	14.8291	11.9452	10.813	-0.250663	36.1413	79.4	76.2191	-8.67543	541.043	99.5348	96.5917	-3.28858	22.5297	2.39586	-0.744536	-12.2152	94.1692	128.501	126.674
Temperate diallel	P01×P06	NK764×LX9801	1.22247	250.275	37.3024	21.9808	3.74038	114.053	53.4509	32.5624	-0.516778	53.6422	-6.29259	-10.7746	-0.851707	51.8097	-7.49697	-13.701	1.05448	18.3337	39.8041	36.0773	1.19278	46.6637	29.7501	16.949	0.0731419	14.7334	11.1166	9.89006	1.73974	35.3746	56.505	43.2379	27.9442	523.028	71.7543	56.6748	1.03904	30.8569	24.8393	9.70094	10.3382	133.037	158.304	116.445
Temperate diallel	P01×P07	NK764×NS701	1.17892	252.887	32.8965	14.3289	0.273799	107.998	46.19	26.8526	-0.544368	53.3868	-7.80573	-13.1144	-0.0661352	52.3611	-7.2199	-14.0059	0.709596	18.3831	36.6529	29.915	0.992516	45.1075	30.0531	20.8018	0.764485	15.4742	20.0877	18.021	0.712365	35.4211	58.8233	47.0054	35.2042	547.482	85.4748	73.7235	-0.293098	28.1275	20.2593	10.4265	5.14044	123.468	160.745	132.258
Temperate diallel	P01×P08	NK764×PHG83	-47.1627	178.221	12.4845	11.8181	-18.3717	78.061	26.214	24.671	3.53924	55.8902	1.13411	-0.477046	2.91555	52.8851	-0.378067	-2.40693	-3.65627	13.3901	3.07736	1.24089	-4.88174	36.0239	12.7814	12.4773	-0.784998	13.8717	6.53219	5.79877	-8.23266	23.1156	9.06517	5.65055	-129.667	330.497	15.9728	12.1299	-5.22868	21.4353	-2.16034	-4.77771	-43.3101	52.8258	18.153	10.3402
Temperate diallel	P01×P09	NK764×PHN47	-1.04403	233.903	41.5353	36.6754	3.95197	104.987	62.1502	56.9778	0.402139	53.2676	-6.50132	-10.5861	0.324478	51.1183	-7.55014	-12.7731	0.540169	17.1624	38.9887	34.5575	-1.02378	41.4613	24.7041	20.29	-0.154306	15.978	17.0297	12.5647	-0.118551	31.8479	67.76	55.2852	-11.8539	504.341	86.7719	83.2558	0.939942	25.2497	18.5198	18.5076	1.68572	99.4574	131.829	124.72
Temperate diallel	P01×P10	NK764×Dan340	5.08668	246.184	50.299	46.3572	-1.46403	107.135	57.4834	45.8706	-0.81416	54.8848	-7.45232	-14.5628	-1.31013	51.8066	-8.78935	-15.9195	0.269567	17.9325	41.1419	40.5952	-0.369989	45.2781	25.6083	13.0077	0.191391	17.1147	19.4923	10.1736	1.69424	34.7797	76.7733	69.5801	29.9763	593.855	105.381	95.9377	0.217214	26.761	14.6638	5.4789	4.1075	113.876	166.382	159.077
Temperate diallel	P01×P11	NK764×HZ1	7.55851	274.98	40.9856	19.195	1.62026	127.823	53.6812	23.221	-0.608728	54.6708	-5.25574	-10.432	-0.871319	52.9156	-5.76255	-12.2759	0.397834	18.5917	28.9881	15.6754	0.979568	46.0615	28.8495	16.7033	0.256562	15.6617	13.2162	7.59988	-1.17498	32.1259	44.1392	33.4858	-13.2236	502.252	57.7089	38.8496	1.20323	32.1896	18.9942	-1.8502	4.96136	132.478	137.09	88.6889
Temperate diallel	P01×P12	NK764×HZ4	3.85721	240.237	41.7277	33.7415	4.13702	114.133	57.3204	38.3726	-0.417556	52.5932	-6.4158	-9.36707	-0.669838	50.3501	-6.66254	-9.93809	1.04143	17.3837	46.0834	36.2925	0.63994	45.2652	30.3933	21.0267	0.168155	15.1801	14.5949	13.4359	0.970316	32.7373	63.5328	59.6217	20.0744	497.776	84.9626	80.8704	0.804386	29.6674	27.2126	17.0966	2.96197	119.37	111.861	67.7879
Temperate diallel	P01×P13	NK764×Nan21-3	7.28929	245.544	45.6835	38.1726	-2.86728	102.424	44.9055	30.0575	-1.01214	53.9218	-6.31127	-11.2246	-0.642376	51.8066	-7.19713	-13.1731	0.0405487	17.3688	24.6089	14.8533	0.842368	44.2106	28.3977	20.0155	0.418363	14.9586	14.2415	14.0885	-0.275539	32.2807	40.0036	26.0728	9.07048	483.175	58.3208	44.1612	1.87804	30.8328	22.3177	5.92588	12.2684	117.557	132.982	98.0027
Temperate diallel	P01×P14	NK764×Qi205	1.66319	232.513	33.37	22.8348	1.7675	107.205	41.1492	20.0645	-0.953998	53.3868	-5.41441	-8.76687	-0.425735	52.2502	-4.22868	-8.54525	-0.132587	17.0491	24.1836	15.955	-0.74628	43.36	23.6231	13.7431	-0.614839	14.3024	2.46593	-3.3948	-0.650068	32.6346	37.9779	21.7945	-29.1166	468.01	40.524	19.7319	1.17411	31.3471	25.2992	9.11233	-5.34318	110.086	101.253	62.2333
Temperate diallel	P01×P15	NK764×Ye478	6.14162	226.803	40.9395	39.6058	4.31269	95.38	50.4335	48.5825	-0.025952	54.5638	-4.8375	-9.52207	-0.743135	51.6957	-7.19196	-13.0014	0.312274	18.5695	35.1507	26.1087	-1.0601	42.0617	19.8119	10.1518	-0.0744597	14.1149	8.83023	7.65364	0.947593	34.9788	54.8207	41.7471	11.0627	495.351	67.524	56.6736	0.434513	29.9625	20.2693	5.06043	-7.90102	101.393	97.9986	66.5616
Temperate diallel	P01×P16	NK764×B73	10.9252	250.728	39.3758	25.1123	3.38134	110.531	47.3723	26.4814	0.040604	55.0915	-5.32732	-11.1632	-0.298599	52.3823	-6.98315	-13.6283	-0.0227833	16.5353	32.6687	29.6408	0.672449	43.4068	28.6648	22.4624	-0.473006	15.2465	7.75407	0.389799	0.35128	33.4302	59.4283	56.0096	-15.0986	508.888	64.7625	48.5755	1.44982	26.0688	19.0296	15.883	3.16585	105.664	141.413	129.734
Temperate diallel	P01×P17	NK764×LH132	-35.3647	189.987	18.9077	18.6161	-14.6099	82.8324	29.4224	26.6752	3.27058	55.6654	1.0762	-0.199385	3.17039	53.0388	0.681571	-0.634165	-3.51655	13.2837	1.48286	-1.04883	-4.66053	37.3251	10.5127	5.07808	-0.810206	13.744	1.89723	-0.871271	-6.77129	24.3806	16.267	13.7701	-114.376	339.997	17.8091	12.5861	-5.54601	22.9515	0.816804	-5.25579	-34.8808	65.7521	44.5424	33.005
Temperate diallel	P01×P18	NK764×Mo17	3.36225	245.037	37.3264	24.0797	0.209594	105.316	57.2582	47.6533	-0.504293	54.3498	-9.59457	-17.4854	-0.742543	51.8066	-7.8717	-14.3466	-0.184174	18.9913	30.7963	16.6198	-0.463744	40.7313	34.156	27.1752	-0.240814	13.4118	15.3986	2.29114	0.877466	38.5615	81.442	75.309	2.55677	520.669	105.851	89.1887	0.909462	28.3173	14.8309	1.08412	0.913776	110.615	193.169	166.26
Temperate diallel	P01×P19	NK764×PH4CV	6.51429	249.523	41.668	29.3672	3.05623	102.839	61.7816	59.3927	-0.238247	53.48	-6.14036	-10.2513	0.123655	52.2733	-6.63456	-12.8684	-0.14249	17.1651	29.0614	23.9787	-0.428771	43.8378	26.0716	16.8491	-0.587443	14.9323	5.99869	-0.868347	-0.0460509	34.5265	53.988	41.887	-21.4412	516.624	60.4282	40.0654	0.39963	28.5917	21.3111	10.6858	-7.6403	115.977	111.04	69.6413
Temperate diallel	P01×P20	NK764×PH6WC	3.10662	251.696	37.2291	21.3335	-3.29041	96.9893	39.5154	26.9098	-0.706174	53.4938	-8.32913	-14.1897	-0.722643	51.9175	-8.16491	-15.0072	0.619186	18.6694	32.4137	20.8853	0.864392	44.4549	27.0652	17.1589	0.356501	15.5679	11.4476	5.00226	2.32027	33.674	54.027	45.0496	46.8692	523.614	67.766	50.0293	-0.447206	31.1003	16.3544	-3.26952	7.46304	125.558	134.116	91.0576
Temperate diallel	P01×P21	NK764×Chang7-2	-4.10517	232.098	38.7142	32.4324	2.59675	117.349	56.3657	34.141	-0.900835	53.2351	-8.89946	-14.827	-0.365242	52.4483	-7.86898	-15.2333	0.855007	17.4428	45.0587	36.7559	0.0161517	45.1585	26.8522	15.2858	0.317788	16.0659	12.4693	3.93259	0.511456	35.3398	69.9462	67.6453	13.1635	565.205	86.5216	70.8413	0.95099	28.5387	24.7973	16.8197	4.73551	127.176	166.906	136.596
Temperate diallel	P01×P22	NK764×Qi319	-0.93939	247.198	40.0566	27.6764	-1.43277	110.027	50.2785	31.27	-0.860805	54.4568	-6.22142	-11.8398	-0.547058	52.6938	-6.22578	-12.7618	-0.522818	18.6805	26.8091	11.8077	0.879709	45.5874	29.2812	18.419	-0.419062	14.0212	9.11779	6.939	-0.872423	33.9615	47.3278	32.6932	-24.9006	479.615	60.1489	48.1438	0.775666	32.281	21.276	1.10181	-2.87644	128.457	143.748	101.161
Temperate diallel	P01×P23	NK764×Si287	6.75709	234.515	43.394	39.8362	4.93557	98.1962	66.6828	56.8289	0.418304	52.2934	-5.46347	-7.05428	0.464941	50.4269	-5.59006	-8.05259	1.31998	18.409	36.3412	29.1896	0.299283	43.7185	30.2361	24.5201	-0.0287785	14.4142	10.8593	9.93639	3.20683	35.0373	67.4431	64.1822	45.7766	506.265	81.9016	79.8938	0.122858	29.855	20.3763	5.50812	25.033	130.725	168.356	133.927
Temperate diallel	P01×P24	NK764×Tie7922	1.66207	258.862	35.0728	15.6109	-1.33261	117.981	47.689	21.4349	-0.485892	53.9218	-5.28545	-9.36431	-0.406394	52.3611	-5.78995	-11.5163	0.381733	17.24	29.0868	23.5311	1.08377	45.0873	25.7169	13.5683	0.581023	15.8961	14.5372	8.53766	-0.926327	33.0769	35.799	17.2723	1.98115	524.098	51.3938	25.6371	1.43877	29.3105	20.4268	7.08479	-1.78389	115.82	95.2705	50.2571
Temperate diallel	P01×P25	NK764×Zheng22	2.09483	225.823	38.2328	34.9451	0.936743	86.6336	56.2432	38.3623	-0.101904	52.1436	-5.7841	-7.4168	-0.00642237	50.4269	-5.66238	-8.1897	-0.163019	18.2476	39.9147	36.8994	-0.71534	40.4626	25.437	24.5505	0.128911	13.744	11.2983	4.82481	1.41129	36.9233	91.7526	80.032	25.1186	509.959	107.519	85.2972	-1.37566	26.1512	3.34012	-10.7635	-4.81937	110.527	163.989	161.96
Temperate diallel	P01×P26	NK764×Zheng58	0.987914	217.867	38.3179	36.6925	0.163063	90.387	50.0146	44.3568	-0.193781	54.0169	-3.39315	-5.99135	-0.647901	51.8097	-5.17817	-9.57505	0.285763	18.3537	31.6295	21.289	0.23509	43.1505	26.1893	18.6679	0.449052	14.3823	14.6566	9.69309	0.699932	34.0559	57.7886	50.3094	26.7042	492.616	78.6818	78.3692	-0.538316	29.4711	12.9259	-4.59058	5.77366	119.525	134.319	97.6427
Temperate diallel	P02×P03	AS6103×F42	-11.8955	228.941	29.6267	25.2865	-9.24824	94.3071	40.7002	34.3354	1.16978	55.5268	-1.19567	-4.84515	0.8203	53.5809	-2.44733	-5.94694	-0.774937	15.2269	18.5836	6.59288	-2.18737	43.1875	18.4205	15.795	-1.17799	16.1773	1.38376	-0.572205	-1.95743	31.4182	39.6386	31.2586	-74.7919	504.757	40.2535	35.0537	0.306901	24.4646	12.8506	12.6441	-14.1676	98.2719	99.9853	86.2992
Temperate diallel	P02×P04	AS6103×FAPW	-11.7796	230.138	28.4766	22.5706	-6.00778	95.4288	36.5032	25.6174	0.0229336	54.8411	-4.90071	-10.5234	-0.361427	52.8851	-6.42985	-12.0882	-1.90327	14.7259	7.01838	3.08573	-2.44602	43.042	15.4302	15.4049	-0.807039	16.0418	4.67937	2.55201	-5.77017	28.0453	15.9222	14.7033	-119.462	450.757	20.8859	20.6054	-0.142339	25.136	13.1885	10.3647	-27.7887	83.7156	63.1899	58.7041
Temperate diallel	P02×P05	AS6103×LH51	2.34533	245.788	43.9347	43.7107	4.5047	94.9278	88.9543	48.6701	0.20962	53.4924	-2.89919	-4.70877	0.207664	51.7328	-2.52933	-2.88404	-0.634708	17.2531	29.8764	20.7769	-0.490383	43.9979	28.681	17.9679	0.867347	17.1588	18.2358	9.69276	-0.458367	37.3679	70.9493	56.1152	27.021	641.744	100.283	71.7062	-2.81849	22.1935	0.111192	-2.22568	-6.00201	110.449	135.929	109.384
Temperate diallel	P02×P06	AS6103×LX9801	15.2817	271.224	44.3937	32.1911	10.2626	122.556	63.5296	42.4453	-0.0121088	54.4923	-4.53622	-9.36063	0.637732	54.1155	-4.14953	-9.86023	1.03707	18.0083	29.7517	26.0635	1.86653	50.18	30.0044	25.7616	0.343279	16.3083	12.2775	4.25569	3.80644	38.8756	59.875	57.414	72.5009	632.589	78.8047	69.2567	0.37617	29.3877	18.1008	4.47782	23.4487	156.215	173.547	154.154
Temperate diallel	P02×P07	AS6103×NS701	4.6073	263.205	34.3946	18.9937	0.340151	110.045	47.7235	29.2571	0.0408016	54.3174	-5.93437	-11.5998	0.0302036	53.2738	-6.34874	-12.507	0.281088	17.6466	24.118	23.5315	-0.905632	46.0519	23.403	23.3309	-0.706679	15.3078	8.17201	-2.14031	-0.676439	35.4666	47.6815	47.1942	-32.9419	544.341	58.0339	45.6447	-0.0425028	27.5718	17.0511	8.24484	-6.93319	121.461	129.368	128.483
Temperate diallel	P02×P08	AS6103×PHG83	9.11175	241.385	47.1889	41.5769	2.42295	100.836	61.4235	57.9238	-0.0282864	52.6681	-4.41491	-6.2146	-0.282208	50.5037	-5.66298	-6.80151	-0.158574	16.5798	20.5318	16.0636	-0.0636911	43.6845	26.3443	17.1276	-0.238791	15.7227	10.0508	0.511871	1.50333	34.2859	49.6698	43.2393	13.4614	538.631	61.1484	44.117	1.37882	27.2365	23.3822	20.993	6.72787	112.931	124.459	114.088
Temperate diallel	P02×P09	AS6103×PHN47	2.57825	244.415	43.0854	42.8179	0.205819	103.222	57.9143	54.3382	-0.617692	52.5932	-7.42068	-11.7182	-0.952783	50.6574	-9.12265	-13.5595	0.325461	16.6397	26.8923	16.4829	-0.516229	44.8114	24.8849	20.1491	-0.214469	17.2226	15.4442	10.1006	-0.372155	33.0286	59.577	37.9866	-13.2563	567.943	77.8729	51.9599	-0.822363	22.6811	5.63843	4.81584	-0.0899155	107.749	122.144	104.265
Temperate diallel	P02×P10	AS6103×Dan340	5.82116	253.808	49.8697	48.8632	1.34312	111.923	63.0383	52.3896	-0.61239	55.432	-6.27248	-13.7109	-0.591095	53.342	-6.82368	-13.4276	0.832759	18.1877	35.0187	27.3194	1.21936	49.71	28.5112	24.069	1.24823	19.4763	24.9406	24.5081	1.67974	36.1995	69.2503	51.2339	71.1038	699.987	106.843	87.2898	-1.28779	24.4497	4.01926	-3.63112	12.3206	132.156	173.321	150.535
Temperate diallel	P02×P11	AS6103×HZ1	9.42828	283.739	41.4472	22.992	1.88541	130.069	55.2265	25.3861	-1.08356	54.5414	-5.21273	-10.644	-0.41228	54.191	-4.25779	-10.1616	0.384826	18.2707	20.3707	13.6782	1.20712	49.1316	28.0045	24.4818	0.704199	17.4141	15.3324	11.3248	1.09942	35.8346	49.3015	48.8958	42.9742	623.454	69.5392	66.8125	0.909229	31.0893	14.2246	-5.20514	18.8742	156.458	154.487	122.843
Temperate diallel	P02×P12	AS6103×HZ4	12.8503	256.12	46.302	42.5836	7.02307	118.999	62.6415	44.273	-0.860386	52.4958	-6.31789	-9.53492	-0.564399	51.2719	-5.73935	-8.28926	1.04202	17.0763	34.8301	19.5392	1.43059	48.8984	30.9238	30.7409	0.682492	16.9992	17.1361	8.67247	1.57531	34.7766	60.0234	45.2893	48.5801	591.287	85.7117	58.2057	0.818381	28.8751	22.9386	13.9694	17.0052	143.48	131.62	101.677
Temperate diallel	P02×P13	AS6103×Nan21-3	-7.05403	238.091	36.7529	33.9784	-5.35343	101.918	42.939	29.4158	0.769626	56.049	-2.3392	-7.72247	0.711993	53.9773	-4.08114	-9.53495	-0.365559	16.6547	13.2676	10.1312	0.33292	46.5437	25.5666	24.7937	0.2517	16.0967	12.0984	2.90297	-0.960243	33.0303	33.3456	29.0004	-6.90451	532.205	50.1477	42.3977	-1.50137	26.6471	5.01962	-8.45406	-13.703	101.652	81.3264	71.2144
Temperate diallel	P02×P14	AS6103×Qi205	-16.5421	221.198	22.9605	16.8569	-16.0908	91.3274	19.2725	2.28235	-0.643529	54.0427	-3.97556	-7.646	-0.527896	52.9644	-3.71308	-7.29517	-0.333495	16.5402	14.1164	12.4939	0.0705717	47.0194	24.691	23.3425	0.199097	16.4211	7.86466	4.97679	-0.476372	34.2426	34.997	27.7957	-0.490003	561.642	46.906	43.6858	0.376105	29.7428	18.1015	3.52812	-0.61492	124.881	107.089	84.0369
Temperate diallel	P02×P15	AS6103×Ye478	-8.9037	218.647	31.3366	28.2407	-3.28126	89.7668	40.2118	39.8383	-0.768482	54.1667	-5.26123	-10.1805	-0.677396	52.5778	-6.36414	-11.5169	-0.316434	17.6328	21.5632	19.7474	0.239553	46.2039	22.4241	20.9995	0.483877	15.978	12.2425	2.14414	0.139089	35.6046	46.4818	44.2831	19.0476	568.34	64.7572	52.0661	-0.495192	28.2265	12.5497	-1.02667	-0.642357	118.719	108.968	95.0227
Temperate diallel	P02×P16	AS6103×B73	-17.3202	229.372	23.6843	14.4559	-14.062	95.0689	25.7186	8.78755	0.960774	56.3571	-2.88089	-9.12241	0.74954	54.2468	-4.43526	-10.5539	-0.597091	15.653	18.3252	9.57571	-2.3168	43.2601	18.942	15.9897	-1.15417	15.8701	2.95265	1.45436	-2.62742	31.8858	40.5763	33.2122	-82.8976	506.094	41.3163	35.4113	-1.94238	21.8703	-0.893173	-2.78052	-22.1311	90.4335	83.1689	71.4395
Temperate diallel	P02×P17	AS6103×LH132	5.99084	238.233	44.0921	39.7281	1.79503	101.218	56.6348	54.7924	-0.072138	52.6681	-4.08286	-5.57313	-0.181068	50.5037	-4.942	-5.38356	0.0137387	16.506	19.1356	15.547	-0.431277	44.3969	21.9397	19.0377	-0.168209	15.6908	6.35136	0.307877	-0.400891	32.1853	41.8924	34.4634	-14.7319	504.646	49.3624	35.024	0.222481	27.9137	21.7246	15.2283	-7.5019	103.198	101.982	95.6375
Temperate diallel	P02×P18	AS6103×Mo17	3.15453	251.719	36.811	27.4634	4.83815	111.925	65.597	56.9196	-0.506624	54.6929	-8.77698	-16.9645	-0.025504	53.34	-5.89721	-11.8114	0.190118	19.0576	24.6821	17.0269	0.762208	44.7998	35.7753	20.118	0.363023	15.3204	18.8757	-2.05976	1.15446	40.2728	75.3568	68.2513	35.3681	618.485	104.66	65.483	-0.239843	26.3617	6.18457	-5.89678	7.11874	126.886	192.814	140.545
Temperate diallel	P02×P19	AS6103×PH4CV	-1.32913	248.569	36.8106	28.8728	-4.85662	96.9065	50.9796	50.1984	0.0462228	54.1099	-4.76292	-9.19421	0.012894	52.9789	-6.12811	-11.6923	-0.163298	16.8363	19.7022	17.8592	1.06268	48.1718	28.7791	28.4013	0.0695943	16.8941	10.0389	8.00059	-0.749055	35.2578	46.0861	44.8923	-10.8659	592.204	59.4969	58.4512	1.08663	28.4724	19.9585	10.224	0.0476605	133.732	120.834	95.6114
Temperate diallel	P02×P20	AS6103×PH6WC	-9.0547	246.424	30.4044	18.7923	-8.09386	94.1666	34.2599	23.2163	-0.0531048	54.4923	-6.35694	-12.588	-0.214104	53.2424	-6.56441	-12.8383	-0.0659217	17.6763	18.9162	14.4549	0.924244	47.3573	25.8823	24.8081	0.216888	16.7331	9.83724	6.97135	-0.427038	32.361	37.2636	35.1975	-3.43044	538.319	48.9635	44.0337	0.400489	31.1417	15.7888	-3.14076	-6.3624	121.799	105.626	85.3382
Temperate diallel	P02×P21	AS6103×Chang7-2	5.03081	248.124	43.5258	41.5765	3.4958	120.229	58.8928	37.4329	-0.233065	54.2483	-6.90639	-13.2059	-0.196403	53.4335	-6.87386	-13.641	-0.201701	16.0781	25.7098	12.5515	0.596604	48.5815	27.0646	24.0245	-0.139575	16.9133	8.7651	8.12333	1.53145	37.7941	67.9133	57.8958	18.8172	635.864	80.4939	70.1328	0.852585	27.634	19.9687	13.1164	-0.961828	131.546	147.029	144.725
Temperate diallel	P02×P22	AS6103×Qi319	6.93569	261.963	43.8921	35.3024	4.76839	118.209	60.1003	41.0315	1.00346	56.6665	-2.14197	-8.26255	0.872181	54.9294	-3.02321	-9.0606	0.482274	19.3776	25.0458	15.9801	0.108261	47.6585	25.7593	23.7989	-0.631025	15.114	7.07606	-3.37923	1.10897	37.3772	50.9272	46.0389	-3.11923	566.401	62.41	51.5472	1.33926	32.0383	19.6169	0.341693	11.6883	153.089	162.572	139.734
Temperate diallel	P02×P23	AS6103×Si287	1.82587	236.473	39.8405	38.696	6.70833	101.95	71.2552	59.6674	-0.151926	52.0686	-5.59219	-7.45384	-0.65872	50.1196	-6.94864	-8.61292	-0.32113	16.4599	15.3676	15.2243	-0.748965	45.5128	25.7154	22.0297	0.00685826	15.7546	10.4203	0.715994	-1.35548	31.9093	40.9527	33.3104	-21.7016	503.791	53.7896	34.7953	0.595453	29.5213	18.238	4.32882	-7.23695	108.522	99.7969	94.1957
Temperate diallel	P02×P24	AS6103×Tie7922	-10.4318	253.658	28.628	13.2867	4.67864	125.973	56.4812	29.6609	0.587778	55.3409	-2.51417	-6.97898	1.00424	54.5881	-2.57118	-7.75297	-0.947375	15.6029	10.4978	9.225	-0.552276	46.2938	20.2482	16.6073	0.480859	17.1007	12.9195	9.32134	-1.27593	34.1616	31.0347	21.1181	-4.93315	582.188	47.2222	39.5626	-1.92563	25.1398	2.58986	-8.1527	-5.99942	121.671	87.4305	57.8482
Temperate diallel	P02×P25	AS6103×Zheng22	1.86121	232.48	37.6262	36.3537	9.0872	96.7648	72.5886	51.5471	-0.222534	52.3684	-5.09894	-7.01766	0.0222164	51.2719	-4.88162	-6.65124	0.538573	18.6412	35.0112	30.494	-0.0567883	43.9637	26.0005	17.8762	0.164548	15.0844	10.7974	-3.56846	2.20029	39.1466	86.6871	63.5463	41.2732	591.119	100.374	58.1608	-0.998064	25.7225	0.982442	-12.2264	7.48819	132.902	179.964	151.949
Temperate diallel	P02×P26	AS6103×Zheng58	-2.07661	221.692	35.9506	30.0266	2.58792	94.7926	55.727	48.4584	-0.239512	54.3166	-2.57366	-5.46977	-0.772962	52.501	-4.69716	-8.3685	0.593755	18.3537	24.7817	21.289	-0.438658	45.3193	23.0518	21.5109	0.261288	15.4993	12.2373	-0.916088	0.277628	35.0679	50.5277	46.5063	13.7904	544.707	67.622	45.7428	-1.33713	27.866	6.0994	-9.78695	1.15032	124.969	120.744	106.644
Temperate diallel	P03×P04	F42×FAPW	-22.4339	227.089	22.5872	20.9466	-12.2604	95.6365	30.8561	25.8908	3.23912	59.7	-0.204939	-2.59581	2.59653	57.2404	-2.25826	-4.84831	-2.30874	13.9129	12.9687	5.12028	-3.7669	41.1747	12.9267	10.4466	-0.841037	16.4117	4.94354	0.868448	-7.7543	25.5577	12.3082	4.52919	-156.187	418.957	16.6941	12.6197	-0.081998	24.3869	9.61907	7.07562	-40.8361	72.597	52.2283	45.6324
Temperate diallel	P03×P05	F42×LH51	6.66715	257.715	45.6988	41.0327	-1.32785	95.5556	78.8955	36.1139	-0.74669	54.1788	-5.35619	-7.15527	-0.385579	52.5369	-4.68451	-7.77952	0.255241	17.7355	49.7958	44.3861	0.936245	44.8781	34.5083	25.9111	0.950149	17.6455	19.0153	8.45154	0.241998	37.5648	83.9374	78.3433	44.4682	664.117	116.633	91.9232	0.257454	24.46	10.1375	7.75948	2.35762	120.738	179.455	165.185
Temperate diallel	P03×P06	F42×LX9801	8.74636	272.294	40.3903	32.7125	-0.295209	118.459	51.6367	37.6828	-0.78142	55.3657	-6.53535	-7.90786	-0.607212	54.2679	-7.23745	-9.60638	0.975301	17.539	41.05	30.1789	0.870561	48.6376	28.767	21.896	-0.135619	16.2333	9.39692	-0.228021	2.71021	37.2759	62.9206	50.9366	40.2723	605.287	78.0613	74.9218	1.84788	30.05	20.5697	6.83229	10.1348	144.83	170.724	135.631
Temperate diallel	P03×P07	F42×NS701	6.11792	272.32	34.8367	23.1148	-3.81529	112.35	44.6511	31.9644	-0.542809	55.3765	-7.55106	-9.87617	-0.75033	53.8906	-8.54993	-11.494	0.686717	17.6447	38.139	24.6966	0.134096	46.5452	27.5511	24.652	-0.332376	16.086	11.2044	-1.13335	2.55703	38.1966	69.1676	58.5243	33.8752	616.083	86.3593	78.042	0.860638	27.6655	17.251	8.6127	9.54523	139.868	183.451	163.109
Temperate diallel	P03×P08	F42×PHG83	9.89187	249.77	46.8243	36.685	3.8035	108.677	65.5589	54.805	-0.247297	54.0918	-5.52666	-7.30436	-0.450451	51.7328	-6.92041	-9.191	0.876155	17.207	39.7683	30.1	0.249137	43.4509	28.7478	21.9069	-0.419259	15.9461	9.21511	-1.99319	1.9762	34.2553	59.5403	56.5649	15.7417	545.837	70.367	57.7414	0.518958	25.5672	15.612	13.5775	7.5257	115.657	147.647	141.58
Temperate diallel	P03×P09	F42×PHN47	-3.40493	246.037	39.0542	34.6418	0.0437754	109.52	59.7867	56.0058	-0.162302	54.6913	-7.2466	-8.19633	-0.583326	52.4242	-9.27919	-10.5447	0.25499	16.1617	38.5035	35.3418	-0.167301	44.6139	27.2674	25.1698	0.275233	18.1162	18.9316	11.3445	0.46861	33.3659	73.229	58.4085	17.1153	603.241	97.4983	74.3305	-1.19472	21.4993	-0.050906	-1.00928	8.76571	118.533	164.029	160.343
Temperate diallel	P03×P10	F42×Dan340	8.43918	264.031	50.4701	44.4892	6.26928	123.309	71.6829	67.893	-0.373201	57.3139	-6.49811	-10.7815	-0.294338	55.0361	-7.1781	-10.6782	0.281088	17.2285	43.2598	36.1302	0.217491	48.1617	27.2283	20.2047	1.33523	19.9672	25.5613	22.721	0.791002	34.8073	74.4578	65.2517	55.5681	689.377	112.405	99.2231	-1.40565	23.5224	-0.0948195	-7.28609	9.08918	130.854	192.462	187.403
Temperate diallel	P03×P11	F42×HZ1	1.0351	282.951	36.8794	22.6504	3.91017	138.554	59.3148	33.5657	-0.328469	56.9392	-4.61846	-6.71562	0.0340768	56.0347	-4.45045	-7.10505	0.257405	17.7357	29.1352	10.3498	1.06905	48.4471	29.0003	22.7475	0.364101	17.4779	13.3975	7.42145	0.268881	34.5006	52.894	43.3529	13.7943	599.2	69.3239	65.6514	0.94357	30.3142	11.2144	-7.56851	10.819	150.332	159.776	114.117
Temperate diallel	P03×P12	F42×HZ4	2.0638	252.939	39.6055	38.4191	-1.72437	116.712	52.8801	41.5002	-0.659597	54.3393	-6.61987	-6.88022	-0.639342	52.5943	-6.80957	-7.67876	1.14225	16.769	49.4483	47.1455	1.18972	48.1111	31.7324	28.6359	0.356694	17.0773	15.1829	4.95931	1.04968	33.7475	66.2787	60.2202	22.6558	570.288	87.2664	64.8076	0.452522	27.6998	17.7354	9.33054	10.3473	138.751	137.846	95.0299
Temperate diallel	P03×P13	F42×Nan21-3	5.86449	258.614	43.4983	41.5249	4.42433	118.156	58.6468	50.0349	0.541715	57.4638	-3.49825	-5.39319	-0.24118	54.4215	-6.68091	-8.79053	-0.39603	16.2167	22.3034	7.23487	-1.06455	44.5998	23.0677	21.0721	-0.605347	15.6435	6.61206	-3.8527	-0.714177	32.7729	40.4513	27.9951	-28.0746	515.961	51.4867	49.1074	-1.06383	26.2752	3.39194	-9.73172	-5.10571	112.178	113.875	88.9437
Temperate diallel	P03×P14	F42×Qi205	6.00999	251.355	35.1285	32.7887	7.61131	121.49	52.3459	36.0629	0.99736	57.3263	-1.89825	-2.03463	1.04016	55.9298	-1.96449	-2.10476	-0.721066	15.7451	20.6549	7.08621	0.5337	46.9361	27.2607	23.124	0.2527	16.8786	8.62998	3.73808	-0.855306	33.3602	39.4133	24.5025	-8.97821	558.079	51.4638	42.7744	-0.669554	27.8877	10.5608	-2.92908	0.956404	128.381	126.449	89.195
Temperate diallel	P03×P15	F42×Ye478	-4.00048	231.155	33.928	26.4982	-2.5897	96.9187	44.2285	38.0555	0.00760677	56.5855	-4.62614	-6.16968	0.0358608	54.6884	-6.02568	-7.96499	-0.157305	17.3844	33.1057	18.0604	0.573181	45.9911	24.59	20.4422	0.984679	16.8827	16.0391	3.76328	-0.922746	34.0393	48.8379	37.9399	17.2732	571.492	72.604	65.1554	-0.35995	27.5523	9.68753	-3.39069	3.38047	124.67	134.334	104.8
Temperate diallel	P03×P16	F42×B73	-22.6655	231.632	20.9137	15.5836	-10.2227	105.369	33.7231	20.5735	2.77286	59.8119	-0.618683	-3.55144	3.288	58.1826	-1.06371	-4.06431	-3.37826	12.4643	5.76994	2.39721	-5.15887	39.8716	12.1758	11.8647	-1.69365	15.7345	0.0360484	-3.29359	-8.01436	25.9954	22.3558	21.3134	-177.15	416.767	21.0575	20.4415	-2.03754	20.9657	-5.16326	-6.80171	-27.092	87.4014	90.9925	90.0287
Temperate diallel	P03×P17	F42×LH132	7.05756	246.905	44.008	35.1169	3.52178	109.405	61.3738	55.8419	-1.64145	52.7415	-7.5771	-9.61833	-0.952811	51.1293	-7.32921	-10.2503	0.249768	16.3345	31.62	21.6768	-0.183849	44.0979	23.9332	23.7221	-0.0496665	16.2132	7.60307	-0.351559	1.27247	33.3552	56.9919	55.6494	15.4884	539.792	66.5971	55.9946	2.85512	29.7369	29.4507	22.7545	-1.69817	110.93	133.623	124.393
Temperate diallel	P03×P18	F42×Mo17	9.02415	265.194	39.4958	34.2866	4.6569	118.204	67.0387	65.7229	0.0969656	56.9392	-8.32604	-13.5542	-0.187747	54.5751	-7.06888	-9.76936	0.0859471	18.5459	33.9973	13.8847	0.713036	44.2042	37.4139	24.0203	0.169925	15.5312	17.6459	-4.54322	0.163728	38.7786	80.1164	76.296	13.885	601.928	108.753	73.9511	-0.435302	25.3568	1.97357	-9.48396	-7.90704	113.789	186.454	149.924
Temperate diallel	P03×P19	F42×PH4CV	7.93569	265.439	41.3362	37.6191	4.57314	112.797	67.4513	60.6727	-0.415688	55.2907	-6.2415	-7.21262	-0.172349	54.191	-7.33595	-9.67188	0.930031	17.5221	38.8362	26.5572	1.45131	48.014	31.2588	27.9807	0.568697	17.7971	13.5979	9.3833	2.01791	37.5213	65.303	54.1942	55.2712	663.267	85.561	79.8228	0.924766	27.5011	15.6726	6.46384	21.2496	156.863	175.45	129.445
Temperate diallel	P03×P20	F42×PH6WC	2.06532	265.15	35.9129	27.8189	5.3298	114.051	55.5661	49.2344	0.606384	56.7945	-5.88663	-8.89499	0.397153	55.251	-6.3966	-9.55003	-0.771093	16.5636	23.4243	7.25011	0.0318717	45.9185	24.8009	21.0162	0.399491	17.3196	11.3919	6.44852	-1.71447	30.5701	38.0804	31.6797	-20.0524	526.623	51.5374	50.8915	-0.70687	29.2249	8.50158	-9.10253	-4.82458	125.266	125.203	90.6133
Temperate diallel	P03×P21	F42×Chang7-2	-15.5883	235.11	31.3493	28.6623	-3.30794	119.885	52.0571	37.0403	-0.427606	55.6965	-7.83041	-10.8889	-0.051546	54.9757	-7.48141	-11.1485	-0.101272	15.771	39.0079	38.3882	0.959832	48.3983	29.3837	23.5568	-0.116473	17.3403	9.3046	6.57574	1.15572	36.9149	75.1875	75.1173	12.9612	634.933	87.6089	83.4894	0.473726	26.4457	14.6121	8.25225	-3.6686	130.768	163.426	143.277
Temperate diallel	P03×P22	F42×Qi319	2.49301	265.125	40.8941	36.9358	4.14784	124.049	61.0813	47.9988	-1.01775	56.288	-6.2839	-8.8753	-0.499662	54.9549	-6.35694	-9.01838	0.574403	19.0622	35.6552	14.0923	0.787389	47.7912	28.9225	24.1436	-0.297123	15.8518	9.85994	-2.57277	2.66984	38.4346	64.7531	50.1704	33.5091	607.955	81.5381	75.6929	0.336102	30.2257	12.6822	-5.33524	5.73064	149.06	172.536	133.425
Temperate diallel	P03×P23	F42×Si287	-1.47951	240.773	37.4115	31.7613	1.53618	103.238	64.6365	47.0569	-0.598837	53.2644	-7.05631	-8.72225	-0.732463	51.4432	-7.98269	-9.69934	0.275499	16.649	29.838	16.8384	1.44526	47.1606	33.3118	32.3149	0.241261	16.3929	12.4207	0.752901	1.47859	34.2399	61.4949	60.4456	29.8913	560.31	78.5971	61.924	0.0554944	28.1719	12.654	-0.439985	6.69467	124.382	145.3	122.577
Temperate diallel	P03×P24	F42×Tie7922	-13.9573	257.737	26.7638	15.1087	-5.3656	122.389	46.2597	25.9721	0.415067	56.8109	-3.58541	-4.5081	0.263102	55.2443	-4.86996	-6.64408	-0.609546	15.5332	22.5393	11.3012	-0.793748	45.5059	20.7961	14.6227	0.512862	17.5366	13.4464	7.78223	-0.972566	33.9615	37.8632	20.4086	-0.521854	591.525	55.0149	41.8009	-2.38789	23.8681	-2.7574	-12.7988	-15.9238	113.675	85.4251	47.4752
Temperate diallel	P03×P25	F42×Zheng22	2.47293	240.696	37.5098	31.7194	-1.71515	92.4228	56.0077	31.6513	-1.11595	53.1177	-7.35958	-8.97365	-1.29833	51.3487	-8.21895	-9.86522	0.0760119	17.7711	43.7478	33.3247	0.0370397	43.5111	27.7304	22.0758	-0.11165	15.2121	9.21721	-6.50445	0.143054	36.5859	87.3064	73.6958	2.85166	557.623	98.3351	61.1475	-0.119222	25.7919	1.09713	-11.9896	-7.63229	119.71	172.93	162.928
Temperate diallel	P03×P26	F42×Zheng58	-3.63759	227.736	34.6066	24.627	-4.09513	94.5699	47.6577	34.7098	0.365778	56.5646	-2.31795	-3.06679	-0.480305	54.191	-5.14823	-5.4189	0.606184	17.9586	35.3915	18.6781	0.34507	45.5566	26.5371	25.2849	0.336091	15.978	13.1322	-1.79713	1.39445	35.6813	63.2248	57.4831	35.0934	570.936	83.5186	64.9947	-0.70859	27.6851	5.25133	-10.3726	5.93355	131.681	148.443	117.743
Temperate diallel	P04×P05	FAPW×LH51	8.40137	260.53	45.2273	38.7572	3.20562	97.9703	74.0248	28.9629	-0.460986	54.9256	-6.45126	-10.3855	-0.562906	52.8455	-6.81951	-12.154	-0.0585153	18.0491	41.4583	36.3717	-0.495407	43.5596	27.4295	16.8438	-0.141697	16.0472	13.0526	6.93286	0.690561	38.4532	73.8693	57.2709	6.55692	616.876	93.0441	65.8221	-1.91839	23.4048	2.93684	2.76351	-11.6399	105.805	133.232	112.248
Temperate diallel	P04×P06	FAPW×LX9801	10.2211	274.85	39.8956	33.9582	8.02436	124.659	53.8956	44.8899	-0.862315	55.7459	-8.16986	-9.04717	-0.772938	54.5881	-9.16524	-9.25728	0.442865	17.6339	32.0485	30.8832	1.16921	49.0494	27.1021	22.9281	0.186234	16.0487	12.9625	6.94285	3.40737	38.4129	56.3193	55.5405	58.6689	614.353	74.0769	65.144	0.824641	30.1474	18.449	7.17856	21.017	154.777	178.09	151.814
Temperate diallel	P04×P07	FAPW×NS701	10.6716	277.955	35.9354	25.6624	9.51748	123.564	53.3962	45.1362	0.933496	57.3139	-6.60614	-6.7231	0.754234	55.8811	-7.6698	-8.22494	0.327181	17.9125	30.8183	26.5892	1.14804	47.6723	27.773	27.6705	0.544777	16.4567	18.9631	9.66162	1.65649	37.7359	55.4664	54.3372	46.7901	619.668	80.3573	66.5727	-0.058502	27.867	15.5178	9.40377	13.8026	143.19	178.014	169.358
Temperate diallel	P04×P08	FAPW×PHG83	6.48489	247.444	43.3398	31.7877	3.04357	105.799	54.3936	39.2677	-0.258792	54.5414	-7.12334	-11.0124	-0.398578	52.2706	-8.575	-13.1097	0.233419	17.1916	29.9382	29.8928	0.441485	43.7564	26.5821	17.3717	0.565894	16.4248	17.5817	9.44905	0.401661	33.1206	42.9781	35.4609	22.049	542.814	62.8225	45.9135	-0.987282	25.1816	11.2109	10.5649	-3.64096	103.555	111.932	107.736
Temperate diallel	P04×P09	FAPW×PHN47	-1.55382	248.969	38.7411	32.5997	-0.184257	107.174	50.0523	41.0775	-0.783898	54.5308	-9.76592	-11.0297	-0.652753	52.8407	-11.0132	-12.162	-0.167346	16.3667	30.0151	23.6602	-0.0285535	44.8658	25.0649	20.3475	-0.280013	17.0545	16.8064	13.6451	0.243273	33.5804	60.2524	37.3415	-3.99545	572.8	79.8825	53.9741	-0.947462	22.8672	3.7593	0.403066	2.09875	110.931	135.752	122.531
Temperate diallel	P04×P10	FAPW×Dan340	16.2124	272.885	53.3206	45.3375	8.44364	123.365	65.1329	62.3913	-0.512596	57.6356	-8.17305	-10.2807	-0.296065	55.5203	-8.81307	-9.89232	1.15245	18.7272	44.6612	41.4952	0.992139	49.0495	26.8304	22.4205	0.705183	18.8307	23.3138	21.2201	3.48196	37.9381	75.2722	55.1641	84.8783	709.357	110.151	90.682	-0.48619	25.5625	6.18666	0.754997	18.3472	139.176	196.738	179.193
Temperate diallel	P04×P11	FAPW×HZ1	1.07862	284.076	35.773	23.1379	0.0567354	132.582	47.557	27.8085	0.109636	57.8384	-5.43819	-5.63313	0.54675	57.0333	-5.32124	-5.44956	0.490919	18.5966	26.9067	15.7059	0.817496	48.3087	25.8873	22.3969	0.200355	16.8077	13.7104	12.0006	1.68434	36.3559	49.8681	48.6931	33.1497	609.225	66.0616	63.7656	0.23313	30.7244	10.5755	-6.31777	5.64369	144.221	140.25	105.414
Temperate diallel	P04×P12	FAPW×HZ4	15.1045	267.061	45.3835	42.2353	3.6835	120.001	51.4692	45.4878	-0.993492	54.4665	-8.70501	-11.1346	-1.06487	52.6547	-9.26539	-12.4712	1.11122	17.3653	43.0407	31.2052	1.17207	48.2066	29.0997	28.8912	-0.459553	15.7546	10.9913	4.98307	3.11094	36.2486	64.8465	48.2542	33.0306	571.333	79.9348	53.5797	2.04028	30.4082	26.4079	20.0205	19.0199	146.488	142.144	105.906
Temperate diallel	P04×P13	FAPW×Nan21-3	-0.526293	253.305	38.6193	34.9089	-2.3634	109.25	41.2224	38.7255	0.75502	58.1382	-4.71537	-5.14399	0.886093	56.0347	-6.47127	-6.85257	1.15363	18.3937	29.7258	21.6305	-0.651504	45.126	21.7686	21.0455	0.267456	16.0099	14.0181	6.6843	1.84639	35.7733	42.9357	39.7133	37.2994	572.004	61.772	53.7602	-1.44027	27.0194	4.15452	-7.17503	-6.07036	110.279	101.937	85.7436
Temperate diallel	P04×P14	FAPW×Qi205	-1.8482	244.578	29.7326	29.2085	-5.65762	106.102	28.4085	18.8294	-0.153135	56.6369	-5.45381	-7.59345	-0.121766	55.2538	-5.78203	-8.15067	-0.234002	16.8595	20.6904	14.6655	0.766748	47.2823	25.4152	24.0322	0.0333531	16.1528	8.36514	7.63654	0.320056	34.9754	36.5024	30.5306	6.97325	564.701	48.042	44.4684	0.032606	29.7105	15.3703	3.41569	3.62455	130.114	121.083	91.7488
Temperate diallel	P04×P15	FAPW×Ye478	-3.74217	232.495	32.7711	23.8257	0.345367	97.735	39.4609	28.6532	0.574612	57.6136	-5.23861	-5.9999	0.435334	55.5738	-7.05036	-7.61873	0.528959	18.698	33.7472	26.9813	0.189029	45.7201	21.1684	19.7325	0.554533	15.9461	14.5771	6.25916	0.800717	36.2026	47.3831	46.7064	30.6581	575.546	67.2668	54.7124	0.335719	29.3686	14.5093	2.97802	-0.806889	119.548	115.939	96.3845
Temperate diallel	P04×P16	FAPW×B73	-28.7887	226.59	16.7502	13.0676	-13.2268	100.246	22.7318	14.7114	2.52597	60.0261	-2.63825	-3.20603	2.80807	58.1886	-3.66485	-4.05441	-2.9522	13.5177	6.40624	2.13431	-4.26962	40.874	12.4067	9.63997	-1.11141	15.8103	4.72443	4.10211	-9.5285	24.9211	8.63932	1.92554	-173.11	411.477	15.1755	10.609	0.150618	24.2745	7.24036	6.5821	-41.3541	72.204	50.6709	44.844
Temperate diallel	P04×P17	FAPW×LH132	-2.46592	238.462	37.075	27.0039	-1.06745	102.697	45.3015	35.1852	-0.677344	54.1667	-7.46082	-11.6237	-0.988838	51.5792	-9.139	-14.259	-0.241468	16.4706	23.5617	22.6906	0.403599	44.7985	23.0703	20.167	0.125787	15.8822	10.0195	5.83336	-0.0766633	32.4459	41.4381	32.7014	0.420554	515.394	52.9362	38.5429	-0.173318	27.8291	18.4215	14.879	4.60247	116.296	134.266	133.294
Temperate diallel	P04×P18	FAPW×Mo17	1.69996	258.951	34.435	31.1253	-1.97193	109.457	48.6231	44.0829	-0.58893	56.7144	-10.7969	-13.8954	0.0177264	55.2665	-8.37858	-8.62625	-0.290889	18.7964	27.3468	15.423	0.946384	44.5507	35.0537	19.5023	0.357279	15.2121	21.0205	1.36805	1.62519	40.6799	75.1685	66.3779	40.6805	619.393	105.55	66.4988	-1.32374	25.589	0.765914	-8.65508	4.58871	125.35	199.283	151.457
Temperate diallel	P04×P19	FAPW×PH4CV	8.7663	267.351	40.4746	38.6103	5.5022	111.607	58.886	46.9134	0.144417	56.3119	-6.82977	-8.1237	0.237124	55.0864	-8.30433	-8.42894	1.1477	18.3671	35.6486	32.6604	0.467357	47.1432	26.0567	25.6596	-0.28305	16.4389	9.33791	9.13358	1.53957	37.4828	53.6681	53.302	15.6138	614.279	65.8298	65.1242	1.11523	28.8122	18.5521	11.5394	10.2577	144.936	145.206	111.999
Temperate diallel	P04×P20	FAPW×PH6WC	-11.6067	252.559	27.8127	21.7494	-8.32713	98.2749	28.9768	28.592	1.74319	58.3924	-5.5373	-6.33177	1.43453	56.7743	-6.34518	-7.05628	-0.258629	17.7034	23.4585	14.6304	0.36322	46.363	23.266	22.1876	0.376844	16.7905	12.5629	11.8859	-1.83231	30.8921	29.6196	26.3465	-19.2079	518.137	43.7238	39.2803	-1.36631	29.6861	8.09312	-7.66807	-15.1045	114.05	97.3761	73.5474
Temperate diallel	P04×P21	FAPW×Chang7-2	6.25355	258.033	42.16	37.4271	5.28883	126.363	54.6205	44.4453	-1.06967	55.5155	-10.3094	-11.1785	-1.6294	53.8838	-11.6882	-12.9133	-0.448608	16.051	30.8693	21.2749	1.52898	49.0806	28.3974	25.2986	0.0488805	16.9992	11.599	9.97024	0.15688	36.3559	59.6995	48.6931	3.72832	616.37	75.3925	65.6862	1.73349	28.8261	22.1313	17.9961	16.634	150.135	189.83	179.308
Temperate diallel	P04×P22	FAPW×Qi319	-0.618078	263.095	37.9729	35.8874	3.83671	121.619	52.228	45.0998	-1.16994	56.5969	-8.01836	-8.37522	-1.02879	54.9117	-8.905	-9.0899	-0.283733	18.8314	25.782	12.7109	1.01304	48.13	27.0308	25.0237	0.11293	15.7554	14.1919	4.98841	-0.363299	35.8413	43.2383	40.0379	-0.842982	564.273	62.2033	51.6819	0.742062	31.7523	16.0864	-0.554038	7.37499	149.769	163.429	134.535
Temperate diallel	P04×P23	FAPW×Si287	9.55071	252.884	42.2831	34.685	4.94615	104.529	59.3696	37.5966	-0.945332	53.379	-9.18332	-12.9089	-1.41329	51.2483	-10.8727	-14.8091	0.858043	17.8589	29.9545	25.329	1.62821	47.4567	31.1143	27.2973	0.297814	15.943	14.2871	6.23851	1.80525	35.0064	52.8971	43.1737	36.2077	557.296	70.5744	49.8065	1.14115	30.3782	18.9627	7.35712	3.52702	120.279	127.517	115.235
Temperate diallel	P04×P24	FAPW×Tie7922	-9.08151	263.694	28.1103	17.7692	-5.79323	119.842	38.4474	23.3511	0.681772	57.5387	-4.72455	-6.12211	1.18208	56.6492	-5.05694	-5.83108	-0.139082	16.631	22.3263	19.1674	-3.2477	43.1651	12.1451	8.72657	-0.193585	16.3237	10.1	8.77536	-1.148	34.2259	29.9993	21.3461	-24.1525	558.564	41.5588	33.8995	-0.439031	26.9376	7.43519	-1.58451	-9.98366	118.68	87.0005	53.9682
Temperate diallel	P04×P25	FAPW×Zheng22	3.94715	243.252	37.0029	29.5548	1.45332	93.4725	50.4588	23.0423	-0.97754	53.7172	-8.65338	-12.3571	-0.478253	52.6547	-8.49194	-12.4712	0.630766	18.9532	42.6961	42.1931	0.0956877	43.6829	25.2249	17.1745	-0.594597	14.2227	6.96574	-5.22496	2.30992	39.1926	84.6426	60.295	13.8917	559.333	90.1582	50.354	-0.339863	26.6919	2.50168	-8.91846	8.76466	135.172	193.718	171.16
Temperate diallel	P04×P26	FAPW×Zheng58	-4.56187	227.893	32.728	21.3747	-1.83066	94.7156	41.516	24.6786	0.138982	56.7989	-4.3391	-7.32913	0.179768	55.337	-5.77151	-8.01237	0.571648	18.5514	30.7937	22.5955	0.202318	45.527	23.6431	22.1211	0.531784	15.6672	16.1267	4.40094	0.630656	35.3573	50.1133	44.6089	28.2712	554.783	71.1797	49.1311	-1.15153	28.3628	5.70414	-8.17861	8.60169	133.414	141.856	120.608
Temperate diallel	P05×P06	LH51×LX9801	-0.429885	265.723	41.265	29.5101	1.90233	107.524	75.3159	24.9736	-1.07293	53.9999	-7.10142	-10.1797	-0.491147	53.1485	-6.18441	-11.471	1.40173	19.8514	54.1473	47.3421	1.19985	48.0803	35.4617	20.4993	0.0941207	15.3992	14.9644	14.856	1.58427	40.6006	82.5632	64.3989	23.889	624.077	107.706	86.9446	1.52069	30.5771	20.3186	8.70621	15.2452	153.952	200.851	150.472
Temperate diallel	P05×P07	LH51×NS701	-4.57643	264.232	34.7359	19.4581	-4.51905	98.514	61.8136	15.7129	1.46848	56.3135	-4.21294	-8.35122	0.753425	54.1589	-5.11614	-11.0534	-1.06674	17.7772	34.5052	25.6331	-0.612815	44.9117	31.2699	20.2774	-0.435037	14.9195	14.5794	11.4885	-1.69931	38.3909	74.9929	59.3307	-42.0429	575.34	97.6302	82.5631	-0.19665	27.4625	14.0223	7.81573	-8.06164	126.273	168.553	137.535
Temperate diallel	P05×P08	LH51×PHG83	4.68472	247.169	50.4716	44.5181	2.23994	93.9815	92.3714	53.8594	0.0776944	53.3425	-4.99475	-5.0137	-0.213587	50.7342	-5.57434	-6.37615	-0.625516	17.5913	37.9202	33.0056	0.599426	42.9146	36.3637	34.7186	0.293501	15.595	18.5349	16.5364	1.00616	37.7359	81.1557	72.4731	23.2236	588.493	109.489	99.6618	-1.21453	24.688	9.21598	8.76394	-4.85968	107.283	141.752	124.089
Temperate diallel	P05×P09	LH51×PHN47	-3.91448	248.133	45.0361	44.9905	-3.57158	92.7727	79.2604	38.7143	0.612189	54.3915	-5.98644	-8.69957	0.268038	52.0401	-6.96567	-11.2001	0.314418	18.1071	49.4923	47.4111	-0.368813	43.5258	32.7933	26.2796	-0.171927	16.6052	20.4296	16.9833	1.90577	39.2537	110.808	98.4314	27.8772	649.177	144.078	143.053	0.44779	23.9961	9.07145	5.71575	5.54783	119.327	180.314	169.614
Temperate diallel	P05×P10	LH51×Dan340	-3.43697	254.761	50.1963	48.957	0.0551154	103.963	88.9019	41.5517	0.51909	57.1319	-5.07727	-11.0648	0.594926	54.6899	-4.79159	-11.24	0.0669167	18.9003	51.5704	49.3398	1.13688	48.1945	35.4676	20.2866	-0.17213	17.396	20.3193	11.9844	1.00126	39.4682	104.381	99.5157	14.0139	682.997	139.574	125.35	1.80936	27.5917	14.7988	8.75312	-1.54259	124.233	192.885	182.64
Temperate diallel	P05×P11	LH51×HZ1	4.00665	288.529	43.6441	25.068	3.82571	125.337	78.5936	20.8248	-0.977578	55.2158	-5.75418	-9.53909	-0.727759	54.0374	-4.85502	-10.4162	0.973684	20.338	43.4491	26.5407	-0.511663	45.9798	30.3369	16.4963	-0.128959	15.921	13.9754	9.38133	2.37714	41.0595	87.2772	70.6057	32.6022	653.182	107.75	80.575	0.528382	30.7533	10.8325	-6.22965	7.89397	151.418	172.606	115.665
Temperate diallel	P05×P12	LH51×HZ4	1.94215	255.423	45.6822	42.1955	5.05947	110.364	85.3177	33.8035	0.263794	54.1884	-5.06961	-6.61809	-0.163078	51.8351	-5.04235	-7.28185	1.06098	18.5737	59.2368	51.2098	0.419809	46.4546	35.6588	24.2068	0.574434	16.2312	21.2904	21.2904	1.30544	38.4539	95.6429	94.3883	40.22	623.027	135.048	133.262	0.691934	28.7935	19.8867	13.6474	9.46008	141.875	153.297	99.4217
Temperate diallel	P05×P13	LH51×Nan21-3	-1.32107	254.035	45.688	42.9503	-3.03403	97.5658	69.1233	23.889	0.263506	56.1113	-3.98091	-7.61991	0.191884	53.6191	-5.04482	-10.1353	-0.353802	18.1449	32.4155	19.9853	-0.0692635	44.7085	31.6431	21.3671	-0.473258	14.7118	11.2071	9.93641	-0.336715	37.601	65.6913	46.8514	-23.9666	555.243	84.3876	65.6634	0.762386	28.9557	11.7838	-0.522882	1.04392	122.34	144.067	106.058
Temperate diallel	P05×P14	LH51×Qi205	4.80314	252.754	40.2945	33.5278	-3.12275	97.6236	55.0625	9.3338	-0.863148	54.3915	-5.11947	-7.04993	-0.538575	53.1156	-3.77731	-7.03052	-0.273637	18.0785	33.9813	22.9562	-1.40081	44.115	27.4864	15.7236	-0.445761	15.1163	7.25687	2.10267	0.235156	38.9013	67.0415	45.1823	-14.7466	587.485	78.5738	50.2974	-0.850142	28.5614	11.0736	-0.584075	12.355	143.791	164.478	111.905
Temperate diallel	P05×P15	LH51×Ye478	-9.50333	228.258	36.8911	33.4612	-3.21526	83.1609	64.9707	29.5476	-0.481402	55.0222	-5.49416	-8.76195	-0.870975	52.5461	-6.74254	-11.5703	-0.122376	19.3053	42.9577	31.1056	0.611269	45.1426	30.3351	18.2201	-0.233781	14.6004	11.4109	9.10395	-0.264283	39.1484	76.1105	58.6439	-17.6413	571.751	96.0537	80.8383	0.595471	29.362	14.655	2.95488	-10.8926	114.409	124.874	87.9429
Temperate diallel	P05×P16	LH51×B73	7.57139	264.475	42.4082	31.972	1.09699	103.556	67.0053	18.4994	-0.599046	55.3657	-6.27897	-10.7211	-0.620339	53.0388	-6.88135	-12.5458	0.465266	18.1938	48.7886	48.117	0.476817	44.6207	34.1343	25.8871	0.475273	16.8396	17.8856	10.8795	0.563504	39.0239	89.3891	82.1138	24.9278	654.019	114.572	90.9482	-1.22073	22.6368	0.175021	-0.272703	-1.13904	117.366	170.2	155.178
Temperate diallel	P05×P17	LH51×LH132	3.13991	245.593	48.305	43.5966	1.37342	94.1246	84.5304	43.9443	-0.490657	52.818	-5.60823	-5.91014	-0.189247	50.6574	-4.99932	-5.09561	0.272996	18.2437	41.9307	35.8985	0.82104	44.2162	32.766	24.478	0.435133	15.6342	14.7592	12.7615	1.92324	38.4566	86.6295	79.4547	43.6827	603.161	111.977	99.7297	-0.408366	27.3277	16.4779	12.8092	11.5542	128.194	183.881	159.315
Temperate diallel	P05×P18	LH51×Mo17	-10.6332	248.142	34.6722	25.6522	-1.78666	98.6284	82.7262	38.2776	1.26216	57.0301	-6.51003	-13.4161	0.891117	54.4185	-4.32173	-10.0283	-1.18482	19.1611	34.1429	17.6625	-1.19278	41.4118	38.545	33.2152	0.0345651	14.332	21.8967	7.09829	-4.72101	38.3445	83.5618	74.3225	-67.2351	555.982	123.398	108.161	-1.16169	25.4847	0.506978	-9.0274	-14.846	110.862	196.435	171.192
Temperate diallel	P05×P19	LH51×PH4CV	2.70574	262.815	44.4398	36.2587	-0.795825	94.2954	86.4564	46.1514	0.557404	55.1895	-4.619	-7.38245	0.563415	53.6913	-5.19148	-10.5048	-0.66971	17.8083	36.3129	28.6246	-0.744702	44.9314	30.9896	19.7641	0.362636	16.5272	16.2038	9.71978	-2.15403	37.8	71.3672	55.3395	-20.734	622.436	95.7538	68.7528	0.019878	27.4505	13.1277	6.26795	8.99551	148.62	172.084	117.389
Temperate diallel	P05×P20	LH51×PH6WC	7.32047	273.011	44.2702	31.6084	1.73614	97.3247	72.1807	27.3487	-0.501924	54.6119	-7.8088	-12.3961	-0.361583	53.2568	-6.85601	-12.8147	0.279836	19.5005	40.6592	26.2667	-1.45794	43.5421	26.1532	14.7533	-0.74387	15.1124	7.14823	1.92968	-2.93891	33.7963	57.2012	45.5764	-68.5865	513.263	66.6167	47.0635	2.78984	33.5759	22.4276	4.43028	0.642748	134.745	152.812	105.037
Temperate diallel	P05×P21	LH51×Chang7-2	11.8892	265.193	53.1636	51.3161	10.2146	120.275	93.8249	37.4865	-0.0778844	54.9719	-7.32834	-12.0482	0.604918	54.3967	-5.51437	-12.0843	0.273157	18.0314	52.9511	46.7949	1.05262	47.6045	35.5147	21.5303	0.428167	16.8211	16.6508	8.81809	1.86878	42.0786	105.954	99.6129	48.4507	705.597	136.014	113.277	0.520338	27.3466	16.0515	11.94	12.4401	150.888	218.894	180.709
Temperate diallel	P05×P22	LH51×Qi319	-3.67994	261.558	43.46	35.0934	-1.38952	105.379	74.9859	25.7247	-0.623125	55.6083	-5.67345	-9.97562	-0.423298	53.7958	-5.34849	-10.9373	0.990832	21.3646	47.3873	27.8728	0.199957	46.3172	33.1277	20.3147	-0.355383	14.7297	13.4367	10.0702	1.0731	41.2885	81.9839	61.321	0.385746	610.006	106.487	88.4191	1.42571	32.1696	17.7772	0.752916	-1.19713	146.144	179.067	128.858
Temperate diallel	P05×P23	LH51×Si287	-8.76026	236.098	39.3993	38.045	-10.834	77.7355	69.2918	40.7987	0.643954	53.4329	-4.92197	-5.02894	0.128001	51.0682	-5.52749	-6.88326	0.724428	18.9839	43.0965	33.2241	-0.707048	44.1217	33.3062	25.6685	-0.1395	14.9483	13.7826	11.7037	-0.64665	36.5653	77.836	71.3423	-16.589	549.004	100.177	95.0805	-0.029094	28.9416	13.5074	2.28015	-12.4296	109.27	125.852	95.5339
Temperate diallel	P05×P24	LH51×Tie7922	-8.28228	266.018	34.7141	18.807	-11.6473	102.975	53.9452	5.98979	-1.60074	53.7208	-7.08043	-9.70217	-1.98673	51.759	-7.93907	-12.5338	0.690283	18.719	42.6786	34.1287	-0.112759	45.3003	27.9905	14.1048	-0.165499	15.7944	12.7052	7.84326	2.355	41.7397	73.9618	47.9858	30.9259	658.147	92.3719	57.7716	-1.23288	25.8774	3.36489	-5.45791	-8.25308	125.358	112.542	62.6312
Temperate diallel	P05×P25	LH51×Zheng22	-4.78812	236.041	39.5148	38.0118	-9.41341	71.5923	68.6352	48.2789	0.374346	53.5337	-4.79216	-4.94862	0.583638	51.9952	-3.88542	-5.33436	-0.529169	19.0519	48.7697	42.9336	-0.164771	42.4227	33.4607	30.584	-0.28771	13.9722	11.9195	4.40962	-1.52058	39.3729	108.41	99.034	-37.5029	552.443	128.582	106.835	0.208589	26.974	3.73778	-7.95584	-3.74116	127.613	207.234	202.454
Temperate diallel	P05×P26	LH51×Zheng58	0.176563	234.156	43.3601	36.9096	3.72271	89.2555	88.8678	54.1793	0.0543692	55.1789	-2.84994	-3.96906	0.653059	54.0889	-2.159	-5.59709	-0.493888	18.7445	36.7433	23.8716	-0.154141	44.1708	30.9758	21.4738	-0.47147	14.1066	11.2582	5.41395	-0.0588445	38.6786	82.2777	70.7122	-21.6214	549.395	102.255	98.9282	0.580822	29.8288	11.3268	-3.4326	4.88447	134.643	165.687	122.641
Temperate diallel	P06×P07	LX9801×NS701	-0.200722	281.107	31.8614	27.0874	0.553187	125.457	46.5838	45.8165	-0.551147	55.5155	-8.66517	-9.64995	-0.936608	54.4215	-9.9908	-10.6221	0.486326	18.4137	33.321	30.1312	-0.413399	48.9363	26.7107	22.6446	-0.167105	14.861	14.0194	10.8418	-0.624504	36.7086	50.4713	48.6395	-16.8194	545.928	68.2431	63.5347	0.622877	32.2816	20.454	14.766	5.52751	156.177	172.502	154.092
Temperate diallel	P06×P08	LX9801×PHG83	1.99323	256.977	41.7134	25.2473	1.34768	114.96	56.28	33.616	-0.694335	53.7921	-7.47674	-10.5253	-0.783519	52.1169	-8.74655	-13.1893	0.922764	18.223	36.5071	35.2557	0.636142	46.7765	30.3767	17.2317	-0.401288	14.5738	10.6663	8.69967	0.803968	34.7766	49.3337	40.8165	-2.29361	508.341	61.7439	52.2753	1.68	31.5821	24.7343	12.2791	8.98638	137.444	151.407	123.615
Temperate diallel	P06×P09	LX9801×PHN47	-5.64457	258.903	37.5995	26.1857	-7.36964	110.845	44.9734	28.8337	0.16666	55.1676	-7.81902	-8.23737	0.434206	54.1589	-8.69959	-9.78794	-0.681001	16.1951	27.4482	20.2041	-0.563996	47.1558	26.8163	18.1823	-0.0881953	16.3625	18.5607	15.2735	-0.96292	33.6279	59.5422	36.1652	-18.4241	548.241	83.15	64.2274	-0.105683	27.4422	11.0341	-2.43883	-0.755112	129.339	144.675	110.428
Temperate diallel	P06×P10	LX9801×Dan340	-7.03346	263.664	41.2297	28.5064	-8.82394	116.954	46.6673	35.9345	0.528461	58.3629	-6.13864	-9.14852	0.217594	56.2652	-7.49704	-8.68337	-0.370103	17.5467	34.3088	30.236	0.750897	51.6337	29.137	28.8703	-0.146699	17.095	18.134	10.0468	-2.03723	33.6726	54.6864	36.3462	-41.0006	573.348	80.0395	71.7484	1.21949	31.0014	15.8949	10.2147	-6.61614	135.475	157.021	120.411
Temperate diallel	P06×P11	LX9801×HZ1	-5.13444	291.887	33.9322	26.5239	2.29325	145.675	53.5266	40.4305	0.648193	58.0632	-4.15308	-4.87415	0.315509	57.0333	-5.22535	-5.44956	-0.601306	17.8464	20.8072	11.0384	-0.590847	49.7258	25.3016	24.6233	-0.447627	15.2759	9.25834	4.94933	-0.627349	35.2979	44.7724	42.9273	-24.6887	541.257	55.6333	49.6327	-0.435891	33.7886	10.9194	3.02533	-28.8072	131.032	99.0241	86.629
Temperate diallel	P06×P12	LX9801×HZ4	-20.3975	245.583	27.6407	19.694	-10.1324	117.042	38.9067	36.0368	1.89567	57.0419	-3.44049	-5.11977	0.97019	54.921	-5.2606	-8.51852	-2.31594	14.2802	16.4875	5.99124	-3.61691	46.2431	19.6428	15.8948	-0.252635	15.0777	12.5643	12.458	-4.97915	29.4122	33.0125	19.0951	-81.7847	446.387	49.5776	33.7168	-4.78974	27.3114	2.16738	-2.90385	-40.9301	107.8	62.5846	51.5252
Temperate diallel	P06×P13	LX9801×Nan21-3	3.61845	271.474	41.8048	32.3128	-1.92399	120.546	46.3029	40.1092	-0.0445228	57.0249	-5.63439	-6.11578	-0.0246484	55.3552	-7.51134	-7.79527	0.250519	17.8326	24.723	17.9205	1.18465	49.7876	29.7595	24.7781	0.240574	15.0992	14.0264	12.6184	0.881792	36.0624	43.3858	40.8423	23.4786	548.053	63.8442	63.5184	0.844813	33.0377	15.4436	13.5008	18.0035	155.614	157.563	153.177
Temperate diallel	P06×P14	LX9801×Qi205	3.68225	264.133	33.9195	28.7349	0.33699	122.954	40.2566	37.7023	0.0346228	56.5109	-4.73293	-6.003	0.204493	55.8113	-4.73237	-7.03555	-0.451557	16.984	20.5556	15.5123	0.114605	49.4556	26.7736	23.9461	0.510361	15.746	11.6246	6.35589	-0.223917	35.6851	38.6067	33.1793	15.4231	563.02	55.3776	44.0384	-1.38341	32.0277	12.6597	11.4813	2.91018	150.661	133.003	122.03
Temperate diallel	P06×P15	LX9801×Ye478	6.47468	256.736	39.669	25.1298	2.79258	111.039	47.8249	29.0593	0.139069	56.8643	-5.5615	-5.70737	0.280893	55.6506	-6.82693	-7.30323	-0.143596	18.3675	30.2752	24.7368	0.140586	48.4971	24.2144	21.5439	-1.05095	13.4568	2.58545	0.368453	0.973024	37.6286	52.4249	52.3647	-25.8369	508.921	56.5917	52.4491	1.29309	34.0592	20.2496	19.4251	3.96215	145.579	137.992	136.849
Temperate diallel	P06×P16	LX9801×B73	14.1984	283.602	39.8506	38.2237	9.46123	133.791	54.2906	53.0969	-1.29617	55.8902	-8.4774	-9.8753	-1.42077	54.191	-10.1925	-10.6459	1.19895	18.0109	40.4605	33.6814	0.588634	48.5577	28.8927	21.6958	0.323004	16.3609	14.4331	7.72751	3.87261	39.5759	71.6039	60.2497	70.0358	644.492	90.5819	88.1668	-0.444903	27.4122	8.29725	-2.54549	18.4954	153.315	185.348	149.437
Temperate diallel	P06×P17	LX9801×LH132	0.708422	255.661	39.9557	24.6059	-0.504837	114.117	50.7218	32.6363	0.0860136	54.6163	-5.74987	-9.15437	0.00902083	52.8083	-6.87385	-12.0376	0.593977	17.6481	31.2248	30.9886	1.41316	48.6335	28.9634	21.8857	0.307505	15.1801	11.3229	9.48661	0.877644	34.6539	50.2572	40.3196	22.2759	527.119	65.8081	57.9004	0.843261	32.5789	24.4588	15.8229	11.8591	144.814	161.161	135.605
Temperate diallel	P06×P18	LX9801×Mo17	-0.529094	270.746	34.4791	31.9582	-3.83842	118.447	50.5392	37.6694	-1.03467	55.9549	-11.1734	-15.0485	-1.01192	54.4681	-9.61084	-9.94627	-0.0208437	19.4085	30.4431	19.1817	-0.373259	46.0565	34.2843	15.4272	-0.0904033	13.8806	17.9305	3.52939	-0.221002	40.0874	71.7074	62.3208	-9.76003	558.822	97.9928	67.3972	-1.78066	28.8653	2.82998	2.6205	-9.70926	132.314	177.44	115.268
Temperate diallel	P06×P19	LX9801×PH4CV	-0.188354	272.42	36.8757	32.7742	-0.709685	116.252	54.4298	35.118	1.95267	57.8064	-3.42139	-3.84814	1.66828	56.7488	-5.4412	-5.47396	-0.75926	16.8022	23.011	21.3576	-0.860085	48.6412	25.6594	21.905	0.299468	16.1376	13.3637	7.13333	-0.76892	36.428	48.5941	47.5033	-2.11645	586.419	66.9104	58.9879	-3.86299	27.5672	2.17718	-1.99444	-13.1452	142.795	119.97	108.867
Temperate diallel	P06×P20	LX9801×PH6WC	3.21288	281.403	36.3989	35.654	2.67328	120.132	47.8904	39.628	-0.636593	55.6989	-9.03301	-10.6525	-0.429515	55.1415	-8.9471	-9.72929	-0.0746837	18.2294	26.0813	18.0362	0.886077	49.7113	27.7187	24.5869	-0.355438	15.1744	7.4914	2.34785	-0.907002	33.0711	38.0496	33.9106	-22.685	504.53	47.7744	44.5612	1.94107	36.7267	21.8543	14.2301	-3.096	147.321	131.67	124.174
Temperate diallel	P06×P21	LX9801×Chang7-2	-12.9232	252.881	32.9434	23.2507	-2.45736	129.474	49.2331	48.0011	1.09979	57.3712	-6.42608	-8.20946	0.865086	56.6095	-7.12812	-8.50798	-1.65646	15.1852	22.6215	12.7084	-3.71256	46.6645	18.0307	16.951	-0.704002	15.3625	6.44232	-0.617803	-5.42451	32.0282	39.9329	29.6877	-101.237	501.274	50.8348	50.1585	-2.21473	28.6111	8.87459	1.71678	-29.1047	125.658	118.124	104.439
Temperate diallel	P06×P22	LX9801×Qi319	7.69987	285.438	43.1524	39.1186	4.11762	132.757	56.318	54.3014	0.914416	58.3675	-4.22938	-5.5088	1.01297	57.1847	-5.03822	-5.32679	1.39601	20.8532	38.189	24.8119	1.95859	51.901	32.4046	30.0748	0.644848	15.4035	18.5103	14.888	1.24361	38.7019	53.9137	51.2147	42.3013	597.287	81.6621	78.9193	1.26444	36.0079	19.9116	12.7742	2.13712	165.793	164.586	159.628
Temperate diallel	P06×P23	LX9801×Si287	-14.4503	242.908	30.2865	18.39	-8.44094	101.999	44.4256	18.552	-0.598775	53.4118	-8.21311	-11.1579	0.321869	53.2147	-7.35465	-11.3607	-1.27399	16.0689	15.9264	12.7674	-1.19093	47.463	26.5503	18.9522	-0.364968	14.3964	9.47625	7.37652	-1.96594	32.4889	41.1429	31.5532	-40.2035	470.755	53.0276	41.0162	-0.653167	32.3171	14.5497	14.2092	-13.7141	124.3	111.85	102.23
Temperate diallel	P06×P24	LX9801×Tie7922	10.6796	297.48	38.6583	32.8582	11.008	147.5	61.0331	51.819	-0.203371	56.3398	-5.79637	-6.2876	-0.0477664	55.6506	-6.6352	-7.30323	-0.0220369	17.0901	24.6134	22.457	0.814557	50.0528	25.7584	25.4428	0.280733	15.9142	13.4577	8.66125	0.403004	37.0306	39.998	31.29	14.746	587.332	56.4172	40.7958	2.05785	33.1677	19.5243	17.9162	16.9151	166.841	140.846	116.449
Temperate diallel	P06×P25	LX9801×Zheng22	-3.52931	249.8	34.1133	21.7491	-2.71477	100.161	49.1389	16.4161	0.503817	54.8848	-5.72918	-8.70777	0.549415	53.9136	-6.20474	-10.1965	-0.940609	17.7239	32.2569	31.5511	-0.387155	46.0255	27.1637	15.3495	0.415821	14.3493	14.8238	7.02522	-1.89698	36.2394	69.7455	46.7396	-14.6857	520.625	89.2833	55.955	0.349716	31.1147	8.34998	6.17359	-6.20601	141.463	172.944	130.153
Temperate diallel	P06×P26	LX9801×Zheng58	-4.97243	241.507	33.8676	17.7073	-3.46215	103.941	44.4347	20.8092	0.67224	57.0184	-3.01294	-5.15886	0.695627	56.0841	-4.40012	-6.58115	-0.587907	17.7339	23.9907	17.1931	-0.845425	47.3047	24.0563	18.5555	0.151162	14.4028	13.4811	7.42426	-1.33934	34.641	46.3078	40.2674	-15.7316	500.65	64.1455	49.9715	-0.235151	33.0124	11.8736	6.87395	-4.98057	141.093	131.414	129.552
Temperate diallel	P07×P08	NS701×PHG83	6.43799	264.077	39.4694	19.388	2.0595	113.083	54.6758	32.8252	-0.916124	53.3425	-9.28378	-13.1864	-0.702947	51.9633	-9.69077	-14.6592	0.0796599	17.7742	29.8519	25.6117	0.544577	45.329	31.0179	21.395	0.666215	15.6908	22.6273	21.3434	0.604089	35.6506	55.0889	47.9579	30.7715	558.6	83.1805	77.2515	-1.20135	27.3035	13.8061	7.19151	-2.80766	121.278	140.072	128.139
Temperate diallel	P07×P09	NS701×PHN47	0.541682	267.744	36.4893	21.0458	2.07577	117.702	54.8536	38.2506	-0.0559296	54.7172	-9.57262	-10.9492	-0.112422	53.3781	-10.659	-12.3357	0.362415	17.6328	35.1613	24.6125	-1.78776	44.5761	24.1537	19.3786	-0.155053	16.3451	21.7304	15.1509	0.489201	36.1539	74.0084	50.0467	4.57341	588.432	102.91	86.7177	-0.353326	25.7973	10.3069	1.27828	-6.00105	119.721	145.788	125.209
Temperate diallel	P07×P10	NS701×Dan340	-1.55981	271.793	39.5958	22.8763	1.58287	124.773	57.3606	46.5559	0.756272	58.3629	-7.12815	-9.14852	0.989466	56.8029	-7.26413	-7.8107	-0.446207	17.8649	33.2902	26.2527	-0.220069	49.3068	27.3971	23.0627	-0.100456	17.1907	21.9441	10.6629	-3.06511	33.7186	57.067	39.9397	-54.1336	577.409	86.7945	83.2198	0.405846	28.7905	13.2533	13.0294	-24.6721	113.047	132.812	112.655
Temperate diallel	P07×P11	NS701×HZ1	0.723618	300.4	32.953	30.2141	0.657663	141.451	49.7857	36.3585	0.330704	57.5179	-6.08034	-6.39109	-0.120719	56.3629	-6.99936	-7.43367	0.18688	19.0289	25.9258	18.3956	-1.26691	47.6938	24.1881	20.8389	-0.401385	15.3716	12.9617	5.60682	-1.26423	35.7349	48.3946	48.3077	-32.0813	551.058	62.8256	52.3423	-0.584034	32.2432	10.6719	-1.68677	8.59789	164.065	165.973	133.678
Temperate diallel	P07×P12	NS701×HZ4	-3.04388	265.592	32.5241	20.0729	-3.59878	120.987	44.3604	42.1099	-1.20122	53.7172	-10.0769	-12.5766	-1.21564	52.501	-10.0974	-13.7762	0.395276	17.3857	38.0086	22.8663	0.50336	49.0074	31.1391	31.0323	-0.256492	15.1233	16.1446	13.0114	0.163978	35.6292	63.3491	47.8691	-5.47155	539.894	86.7568	71.3159	1.25692	31.9608	25.8113	25.4757	9.98919	154.347	148.34	116.953
Temperate diallel	P07×P13	NS701×Nan21-3	5.96061	276.471	38.6166	24.9914	4.97062	124.852	52.3618	46.6494	-0.352012	56.4896	-7.53393	-8.06462	0.428124	55.5738	-7.80394	-8.72963	-1.22291	16.7535	14.465	10.7845	-0.766812	46.4802	25.3216	24.478	-0.461983	14.4461	12.2621	10.4756	-1.20189	35.0526	41.057	36.8986	-32.0231	509.746	56.7703	52.0888	-1.70993	29.0857	6.58085	-0.076268	-7.00647	126.232	124.351	112.615
Temperate diallel	P07×P14	NS701×Qi205	-5.1818	257.924	25.6689	16.6062	-0.596194	119.432	36.9428	33.7582	0.624633	56.8731	-5.18132	-7.44049	0.112365	55.485	-5.97476	-8.87547	-0.105331	17.7245	22.8595	20.5487	-0.18746	47.7976	26.6814	25.3839	0.448044	15.7331	14.5682	6.26903	0.460184	37.4431	47.1534	39.7402	24.4694	589.26	66.9228	50.7515	-0.784958	31.2289	15.2339	8.7009	2.37684	145.756	140.887	114.801
Temperate diallel	P07×P15	NS701×Ye478	3.46403	256.381	33.6528	15.9085	-1.0624	104.596	40.0866	22.8562	-0.0174204	56.48	-7.22055	-8.08025	0.511665	55.6472	-7.49403	-8.60908	0.15332	19.0587	32.0079	29.4309	0.142321	47.1429	24.84	23.4586	-0.604407	13.9528	9.48525	8.76917	1.03234	38.7618	58.951	57.0773	-9.24884	542.703	71.9285	71.6507	2.78125	34.1501	26.5029	19.7438	18.89	156.135	173.838	156.487
Temperate diallel	P07×P16	NS701×B73	9.58125	281.64	33.6068	27.328	3.40614	125.147	45.076	43.206	-0.570864	56.3877	-8.65371	-9.07307	-0.299999	55.0776	-9.36466	-9.54455	0.723763	17.93	36.2327	26.7129	0.680969	47.2941	29.9554	26.6577	0.217447	16.3048	17.1011	7.35812	3.44203	40.2192	76.6968	66.9186	62.0637	653.714	98.801	90.8592	-1.43675	25.0231	4.33356	-1.76117	9.54028	139.988	182.367	163.335
Temperate diallel	P07×P17	NS701×LH132	2.85918	260.467	36.5982	17.7559	-3.19252	108.84	44.6134	27.8422	0.130724	54.4332	-7.12762	-11.4114	-0.226607	52.3385	-8.39222	-14.043	-0.701107	16.7473	21.469	18.3546	-0.0913091	45.7731	25.6443	22.5843	0.649777	15.5718	17.4129	12.312	-1.39824	33.4519	46.9612	38.8328	0.770314	522.808	69.4309	65.8941	-0.719982	29.6184	19.1974	16.2796	-16.3166	112.266	118.852	111.187
Temperate diallel	P07×P18	NS701×Mo17	2.41826	276.349	32.0108	24.936	-1.2065	118.49	51.4612	39.1768	0.177438	56.9392	-10.5516	-13.5542	0.0206568	55.2665	-8.9313	-9.23431	-0.238628	19.585	28.7009	20.2655	0.689276	45.7631	38.6032	22.5575	-0.531761	13.4887	18.3583	6.54497	0.416918	41.7992	81.3753	73.4759	-21.1001	564.676	106.916	79.1795	2.48069	31.7294	18.6472	13.2643	1.4666	139.118	219.527	161.697
Temperate diallel	P07×P19	NS701×PH4CV	-5.5474	269.716	30.2753	21.9376	-1.77417	112.599	50.4774	32.2567	-0.0942152	55.5317	-8.23747	-9.62358	0.231255	55.0776	-8.87431	-9.54455	-0.601244	17.3545	23.9815	22.6458	0.351149	48.4965	29.5716	29.2668	0.214111	16.1017	16.1605	6.895	-0.350199	37.9206	56.6032	55.8351	2.84606	608.575	77.9485	64.9949	-1.92164	28.1113	9.58909	8.82608	-14.046	137.522	126.325	101.155
Temperate diallel	P07×P20	NS701×PH6WC	-1.21187	279.633	30.4765	26.4208	10.3232	125.194	54.9806	47.0503	0.0660572	56.1737	-9.23953	-9.89082	0.406057	55.7429	-8.59857	-8.74476	0.479032	19.1774	29.6033	24.1746	0.116912	47.5862	26.4175	25.4113	0.631805	16.2111	17.9572	9.34016	0.655708	35.7077	50.9501	48.1948	33.0424	577.451	73.891	65.4551	-1.02807	32.3603	12.3169	0.649425	9.42346	155.468	161.562	136.572
Temperate diallel	P07×P21	NS701×Chang7-2	14.3776	282.837	42.6846	27.8691	6.43596	135.779	57.3167	55.2081	0.221197	56.2648	-9.21166	-9.97963	0.524458	56.0347	-8.71069	-9.43697	0.123153	17.3591	36.4457	22.6783	0.854272	49.8754	30.3745	27.3277	0.468341	16.5843	17.9617	7.28619	0.896008	39.4226	74.532	63.6125	32.1452	651.851	101.817	97.0313	0.430522	29.8591	19.6724	17.2246	14.7969	165.188	209.016	207.312
Temperate diallel	P07×P22	NS701×Qi319	-2.10548	278.287	34.1775	25.8125	0.305138	126.356	49.5741	48.4154	0.324126	57.5494	-6.58717	-6.83322	0.603642	56.5412	-6.768	-7.14084	-0.295172	19.5563	26.7511	17.0496	0.651329	49.2378	29.852	27.9014	-0.387509	14.4206	14.2321	13.9059	-0.277471	38.2547	53.9762	49.4675	-18.1942	553.985	73.4198	71.1154	1.0173	34.3635	19.7316	7.62406	3.10978	162.394	177.554	154.305
Temperate diallel	P07×P23	NS701×Si287	-6.77309	253.24	30.2344	14.4886	-1.67952	106.172	51.299	24.7076	0.0546356	53.8374	-8.52318	-12.381	0.131241	52.7899	-8.77248	-13.3017	0.0867939	17.824	25.5222	25.084	-0.287397	47.0106	29.7745	25.8984	-0.265725	14.5451	13.8417	12.8131	0.890678	36.4194	60.3122	51.1486	5.92595	534.078	79.0497	69.4703	-1.00491	30.5681	13.7035	8.02823	-3.27359	130.369	139.115	133.29
Temperate diallel	P07×P24	NS701×Tie7922	-3.83411	285.621	28.3403	27.562	0.157095	134.061	47.0838	37.9862	0.32414	56.6395	-6.33284	-7.82067	0.570506	56.0347	-6.65955	-7.97268	-0.380921	17.1255	21.8632	21.0274	-0.601808	47.2805	22.7416	19.0927	-0.215524	15.4674	13.2902	5.61052	-1.23818	36.4633	39.4382	29.2786	-25.4095	564.371	54.1371	35.2915	-0.0946944	29.6179	12.0977	8.20787	4.32164	149.876	130.151	94.4388
Temperate diallel	P07×P25	NS701×Zheng22	-9.73795	246.246	26.7556	11.3268	-11.3408	88.9468	33.3347	4.4754	-0.692472	53.4607	-9.20837	-12.9941	-1.33082	51.7992	-10.5478	-14.9288	-0.339273	18.7195	36.2444	32.2924	0.59668	45.6534	30.7615	22.2637	-0.0904357	13.8925	14.5948	9.73452	-0.613555	38.5967	83.3694	60.1849	-13.2523	539.252	102.949	71.1122	0.455574	29.8233	8.88946	1.7669	-8.35965	134.937	183.029	153.834
Temperate diallel	P07×P26	NS701×Zheng58	-10.2064	238.928	26.8091	8.01825	-4.62173	100.193	40.1032	17.6849	0.19455	56.3129	-5.28038	-8.3522	0.265899	55.4202	-6.21449	-8.98189	0.571309	19.2874	31.7342	27.4593	0.61221	47.4064	28.6426	26.9584	0.221705	14.5228	17.8976	14.7132	-0.169116	36.8851	57.7895	53.0813	1.70371	535.279	81.0447	69.8515	1.54021	33.3905	18.4884	8.098	-11.5065	130.195	129.146	115.286
Temperate diallel	P08×P09	PHG83×PHN47	-1.65817	239.22	45.5846	39.7824	2.24327	106.578	66.576	59.356	0.149582	53.3425	-7.81744	-10.4604	0.469566	51.5024	-8.67818	-12.1176	-0.172648	16.4706	30.8885	24.5322	-1.76742	41.3871	24.805	20.0747	-0.181935	16.2652	19.9261	14.588	-0.655627	31.6486	60.9044	44.6509	-18.4888	513.257	83.439	74.136	-0.672806	23.7212	8.28434	5.37697	-2.35559	101.175	119.626	111.33
Temperate diallel	P08×P10	PHG83×Dan340	3.56395	250.592	53.8776	48.9781	2.02937	113.928	69.374	55.1191	-1.29952	54.7269	-9.09002	-14.8086	-1.01215	52.3436	-9.60037	-15.048	0.556451	18.2404	40.9511	37.9134	-0.0834475	46.2341	28.5684	15.3936	-0.457939	16.7802	17.8999	8.02032	0.693665	34.1169	67.5703	55.9323	-9.20677	570.223	90.7647	88.1405	0.436366	27.0644	13.0468	6.67476	-1.87731	113.65	147.523	137.388
Temperate diallel	P08×P11	PHG83×HZ1	9.21647	282.569	45.5816	22.4847	2.88686	132.389	60.6491	27.6225	-0.789884	54.8171	-6.45259	-10.1923	-0.752231	53.2737	-6.95355	-11.6823	0.415018	18.6299	27.174	15.9131	0.616329	46.3677	30.0201	17.4791	0.0676327	15.7876	14.8758	8.46484	0.0341435	33.6728	46.5749	39.9133	0.797102	531.823	62.0256	47.0248	1.65179	32.7224	18.3296	-0.225635	1.29415	134.57	127.92	91.668
Temperate diallel	P08×P12	PHG83×HZ4	7.29037	249.602	48.0772	38.9548	2.49192	115.787	61.3024	40.378	-0.969812	52.3684	-8.27599	-9.75447	-1.06245	50.1965	-8.8128	-10.2128	1.08811	17.4514	43.8047	31.9479	1.1448	46.4395	34.1097	24.1665	0.332075	15.6588	19.02	17.0134	1.32254	33.4273	61.4549	52.7805	30.3248	523.577	87.7367	77.6375	1.91504	30.8623	29.0051	21.8129	11.1032	133.27	123.948	87.3259
Temperate diallel	P08×P13	PHG83×Nan21-3	5.23186	249.418	48.8156	40.3526	5.60602	114.196	63.3296	45.0063	0.7037	55.9651	-4.24944	-7.8606	0.043512	52.7315	-7.37151	-11.6229	-0.415968	16.9333	19.4649	11.9735	0.209129	44.2468	28.8259	20.1138	0.293134	15.1482	16.4926	15.8449	-1.65941	31.2346	31.5581	21.9873	-15.879	473.776	50.4272	41.357	1.10989	30.1489	16.8139	3.57635	-2.4975	108.55	102.43	82.832
Temperate diallel	P08×P14	PHG83×Qi205	-0.369446	236.412	36.3448	24.8944	3.16924	111.906	48.8386	25.3293	0.172845	54.8411	-4.35387	-6.2816	0.661553	53.5765	-3.74473	-6.2238	0.496197	17.6989	26.7413	20.3745	-1.83662	42.9391	22.7252	12.639	-0.658269	14.5738	5.08991	-1.56163	0.372156	33.9946	39.6825	26.8701	-15.3598	497.318	45.0696	27.2298	0.182262	30.4395	18.8115	5.95318	-8.26679	112.921	95.1424	66.4116
Temperate diallel	P08×P15	PHG83×Ye478	-0.172114	226.42	41.5324	39.3704	1.31679	95.6833	52.756	49.055	-0.151008	54.7662	-5.95195	-9.18645	-0.100047	52.5778	-7.44217	-11.5169	0.287558	18.5658	32.8454	26.0835	0.742362	44.5336	27.1658	16.6253	0.316911	14.8211	15.0761	14.618	2.27442	36.6434	57.4158	48.4927	43.4332	543.272	77.856	71.8306	-0.774334	28.8379	13.0231	1.11714	1.43557	116.489	114.233	91.3593
Temperate diallel	P08×P16	PHG83×B73	-2.01809	243.716	36.1929	21.6133	-7.23586	103.213	39.0341	18.1074	0.743548	56.1219	-5.01691	-9.50168	0.619989	53.5399	-6.75488	-11.7195	-0.1155	16.4636	29.6424	24.4792	-1.19829	42.2055	25.425	19.0732	-0.175436	15.8589	12.8018	4.42212	-2.4567	30.96	42.9772	41.5036	-48.7496	490.788	54.0315	43.2909	0.844874	25.5481	13.5305	13.4926	6.21584	114.472	143.898	139.105
Temperate diallel	P08×P17	PHG83×LH132	-34.9919	196.292	23.5837	22.5521	-11.9449	88.7966	40.4206	35.7962	3.99214	56.7144	1.3348	0.990596	3.23858	53.346	-0.81317	-1.55639	-3.40497	13.4163	0.683365	-0.0610823	-4.75297	37.9021	12.5087	6.70246	-0.614335	14.2547	6.39555	2.81216	-7.00166	24.488	13.085	11.9231	-116.967	352.957	18.2964	16.8777	-4.57666	24.0051	2.72748	-0.906513	-26.8772	79.5145	63.4231	60.844
Temperate diallel	P08×P18	PHG83×Mo17	-5.42559	242.181	36.4477	22.6333	-1.81161	106.594	61.0068	49.4451	-1.08975	54.0918	-11.3431	-17.8771	-0.594455	52.1937	-8.96982	-13.7066	-0.28939	18.9071	28.1369	16.1027	0.120117	41.9846	38.6784	31.7991	-0.127643	13.8398	20.0133	7.02915	-0.39321	37.6286	71.524	71.0679	-8.43691	525.226	99.9331	78.1969	-0.923986	26.5681	5.16938	-5.15999	0.370868	115.831	183.229	141.942
Temperate diallel	P08×P19	PHG83×PH4CV	-3.78515	245.154	39.9382	27.1025	-0.728274	102.353	62.9808	58.6406	-0.376503	53.6692	-7.2644	-9.93378	0.317943	52.7066	-7.6804	-12.1461	-0.550406	16.7782	23.9562	21.1842	-0.0882095	44.8478	29.2973	19.5412	-0.155582	15.679	12.0169	4.08873	-1.68083	33.2295	43.8099	36.557	-32.7264	520.89	56.9915	41.2219	1.55988	29.8362	23.4375	15.5036	-2.80301	126.573	117.776	85.1403
Temperate diallel	P08×P20	PHG83×PH6WC	8.49599	263.017	44.1434	26.7908	-0.880712	102.698	49.3721	34.3799	0.162869	54.6903	-7.6939	-12.2704	0.178145	53.0573	-7.94576	-13.1413	1.08937	19.1606	33.6636	24.0658	1.35975	45.6197	30.7172	20.2287	0.235022	15.7613	13.5656	6.30636	3.78569	35.4772	57.345	52.8169	66.0926	558.388	73.4792	59.9931	-0.362354	31.2694	14.4094	-2.74357	3.04093	126.894	123.42	93.0916
Temperate diallel	P08×P21	PHG83×Chang7-2	6.7939	248.929	49.6173	42.0356	0.78115	118.832	59.9743	35.8369	-1.04599	53.4174	-9.96592	-14.5353	-0.858854	52.1937	-10.0598	-15.6448	0.864091	17.4729	42.5162	32.1104	1.54601	47.3578	33.3536	20.9005	0.266058	16.329	15.038	5.63462	0.91378	36.0799	67.9721	64.9043	20.0453	587.638	87.8694	77.6219	2.17144	29.8434	27.1542	22.1603	14.6911	142.89	181.203	165.83
Temperate diallel	P08×P22	PHG83×Qi319	-1.46013	252.609	43.8919	30.471	-0.928768	113.83	57.1156	35.8074	-0.654062	54.991	-6.73833	-10.975	-1.51657	51.9633	-9.30696	-13.9712	-0.00523409	19.2191	28.4112	15.0314	1.02267	46.3998	31.9081	20.5293	0.393108	15.1482	18.7225	17.1476	-0.901099	34.2706	44.3784	33.9009	-0.274926	519.791	68.0828	60.5536	0.737418	32.327	18.7619	1.24588	-5.15045	131.942	136.173	106.618
Temperate diallel	P08×P23	PHG83×Si287	5.06426	238.753	46.8335	42.3635	4.89677	101.457	74.4843	66.0971	-0.133952	52.0686	-7.36806	-7.45384	0.149129	50.3501	-7.64212	-8.19263	0.541162	17.6512	28.4865	23.8715	0.823644	44.9123	34.1374	27.9203	-0.215908	14.5419	12.6233	12.4588	1.97965	34.1479	58.0197	56.074	22.6532	498.692	73.1062	69.1945	0.0988104	29.9152	17.7597	5.72087	9.36458	120.815	132.879	116.194
Temperate diallel	P08×P24	PHG83×Tie7922	10.0195	273.151	43.2344	21.9925	3.46449	126.077	59.3509	29.7683	-1.16785	53.5673	-7.36388	-9.96018	-1.27371	51.7328	-8.73265	-12.5781	0.847247	17.7265	30.4285	27.0173	1.59112	46.2641	29.3095	16.5325	0.348093	15.978	15.881	9.09687	-0.346403	33.9946	35.749	20.526	5.05496	542.722	52.4722	30.1018	1.60763	29.5636	18.5339	8.00948	-0.179396	123.183	97.1616	59.8097
Temperate diallel	P08×P25	PHG83×Zheng22	-3.5763	226.084	39.1966	35.1006	-3.18956	85.8065	56.9178	40.4759	-0.12966	52.4433	-6.74998	-6.88467	0.292266	50.9646	-6.5851	-7.21073	-0.0548353	18.3768	38.4046	37.8687	-0.221079	41.6263	29.391	28.1326	-0.0901185	13.8398	12.8993	7.02915	2.63752	38.4873	93.0088	75.9074	34.2698	534.661	109.254	81.398	-1.96701	25.6441	-1.01918	-12.4939	6.82442	127.93	184.075	167.214
Temperate diallel	P08×P26	PHG83×Zheng58	-5.02432	217.786	39.1004	38.2803	-4.75144	88.7717	49.2295	45.3303	-1.06034	53.4778	-5.86353	-6.92958	-0.771213	51.9254	-6.8479	-9.37311	0.779946	18.8689	33.0755	24.6937	0.913751	44.4986	30.4611	22.3753	0.405622	14.6537	17.667	13.3234	1.05696	34.7507	56.0549	53.376	29.4813	510.944	78.9889	73.3513	0.680626	30.7743	15.2598	-0.371652	12.3976	131.908	143.483	118.118
Temperate diallel	P09×P10	PHN47×Dan340	-6.91316	249.678	47.1532	45.8936	-7.88736	108.614	54.8023	47.8838	0.698078	57.239	-7.54042	-10.8981	0.548779	54.7288	-8.95172	-11.1769	-0.384914	16.8749	37.2094	33.3362	-1.72504	46.1719	23.8946	15.2385	0.359854	19.0736	28.3173	22.7838	-1.02812	33.0133	81.895	75.228	-5.74587	629.714	121.757	107.769	-1.46101	22.8128	-2.24402	-10.083	-14.1209	103.042	133.622	132.82
Temperate diallel	P09×P11	PHN47×HZ1	-0.813734	282.102	40.407	22.2823	-2.38707	131.718	54.4032	26.9754	0.21831	56.3398	-6.57718	-7.69763	0.032194	54.8824	-7.70196	-9.01534	0.367752	18.1585	29.6401	12.9801	-0.490809	46.84	26.703	18.6757	-0.164475	17.0311	18.4772	17.008	0.519756	34.7766	67.4931	44.4997	4.4592	591.516	88.8099	63.527	-0.791694	27.9247	3.23669	-14.8544	-5.46554	129.446	126.169	84.37
Temperate diallel	P09×P12	PHN47×HZ4	-2.54063	249.334	42.1657	38.8057	-4.17841	113.719	52.2726	37.8712	-0.360318	53.4924	-9.02885	-10.2088	-0.580825	51.5024	-10.0473	-12.1176	-1.25475	14.6844	27.766	22.9705	0.608863	47.483	32.138	26.9565	0.739318	17.5417	27.2216	23.581	-1.30435	31.4186	69.8881	60.8875	-2.25546	547.028	107.253	106.543	-1.30944	25.2836	8.42528	-0.206151	-4.13863	119.664	107.387	68.2011
Temperate diallel	P09×P13	PHN47×Nan21-3	11.2347	264.984	51.9206	49.1119	5.67079	118.864	63.2373	50.933	-0.399406	55.3765	-7.94655	-8.82966	-0.0202632	53.492	-9.5428	-10.3484	-0.809133	16.116	19.0955	6.56898	3.52989	49.147	37.8497	33.416	0.196526	16.5272	21.2081	16.4338	-0.232803	33.2794	54.5582	29.9733	1.6934	547.379	82.456	63.3173	2.58201	29.2668	16.1153	0.5459	19.0021	131.685	154.146	121.799
Temperate diallel	P09×P14	PHN47×Qi205	-1.55505	244.79	35.8332	29.3203	1.83757	115.177	47.5022	28.9928	-0.18036	55.0024	-6.84751	-7.67413	0.151388	53.8906	-6.87329	-8.04246	-0.502968	16.2756	22.1681	10.6943	3.04504	49.4002	36.1097	29.5879	0.172423	16.8801	16.4165	14.0162	-0.921632	33.319	50.5811	24.3488	-11.6823	557.026	69.8947	42.5049	2.24828	30.1513	20.53	4.95002	5.17142	127.995	128.328	88.6261
Temperate diallel	P09×P15	PHN47×Ye478	-4.98722	231.168	38.5915	35.0776	-1.37354	97.5957	48.9173	45.9257	-0.332914	55.0988	-8.07705	-8.63493	-0.032122	53.47	-9.39215	-10.0154	0.132393	17.9865	34.9001	22.1494	-0.179377	45.1913	24.4031	18.3477	0.189803	16.1696	19.6755	13.9145	1.54203	36.5292	73.3871	48.0299	32.1725	588.042	102.418	85.9907	-0.697214	26.5608	6.62428	-6.86728	1.84418	118.533	125.492	94.7176
Temperate diallel	P09×P16	PHN47×B73	13.1026	268.4	44.4798	33.9305	7.30961	122.362	58.6333	40.0188	-0.761058	55.1318	-9.31412	-11.0982	-0.922286	52.8219	-11.4108	-12.9034	0.462235	16.6172	37.8226	36.5143	2.20457	47.1878	34.9904	33.1296	0.992657	18.5026	25.946	21.8294	0.264516	34.2994	76.4037	60.0659	34.8055	630.373	107.578	84.0445	1.84609	24.1951	10.4855	7.55385	25.0342	134.926	198.999	193.358
Temperate diallel	P09×P17	PHN47×LH132	6.49933	247.346	49.3152	44.5308	4.36595	109.71	65.8883	64.0394	0.288931	53.5257	-7.19492	-10.1529	0.761006	51.6927	-7.67603	-11.7929	0.922165	17.3193	36.5558	29.0126	0.442294	44.6768	27.6679	25.7747	0.194157	16.5388	17.8846	16.5156	-0.244151	31.8637	63.8708	48.6894	-2.72339	523.231	84.6141	73.262	1.17036	27.3979	20.3597	13.099	5.58094	113.608	142.509	129.81
Temperate diallel	P09×P18	PHN47×Mo17	-1.48999	255.679	38.7222	29.4687	-0.356234	112.652	63.0193	57.9386	-0.0857248	55.6103	-11.3363	-15.5717	-0.05703	53.5554	-10.0573	-11.4553	0.154845	18.9272	34.1109	16.2262	-0.319221	43.1247	36.5518	25.1159	0.117729	15.5608	27.928	9.62542	-0.497098	38.1429	93.3469	73.406	3.88969	593.583	139.586	124.121	-0.936766	24.2011	-1.85215	-13.6095	0.0788805	117.174	199.772	164.751
Temperate diallel	P09×P19	PHN47×PH4CV	1.48365	259.986	42.8432	34.7923	0.550799	108.235	64.7422	61.8338	0.431092	54.9913	-7.70391	-7.71507	0.038268	53.2512	-10.1983	-11.2384	-0.371471	16.533	28.2294	19.4132	-0.789048	45.7264	27.0453	21.8831	-0.15028	17.1599	17.3022	13.9201	-0.0715149	35.457	69.6795	45.7109	-3.53254	606.114	91.2955	64.3276	-0.244898	25.6772	8.95543	-0.596948	-2.994	128.018	127.336	87.2536
Temperate diallel	P09×P20	PHN47×PH6WC	-0.827518	263.256	39.0761	26.9063	0.129062	108.311	51.1619	41.7238	-1.46084	53.5811	-12.1	-14.0497	-1.26913	52.4343	-12.382	-14.1612	-0.647395	16.9997	24.152	10.0739	-3.19399	42.6454	17.7856	12.3901	0.548714	17.5506	20.9519	18.3748	-1.6171	30.6926	50.9178	32.2074	-10.8081	537.518	75.1281	54.0132	-5.80723	23.4703	-12.1842	-27.0009	-22.6223	102.867	87.0724	56.5298
Temperate diallel	P09×P21	PHN47×Chang7-2	-8.86691	242.831	40.2046	38.5564	-4.34648	118.308	53.2857	35.2369	-0.811196	54.1667	-11.2578	-13.3365	-0.684429	53.1924	-11.6974	-14.0307	-0.170574	16.0141	37.8387	34.1057	-0.0204255	47.3708	28.6574	20.9337	-0.0925491	17.446	17.6697	12.8607	-0.455708	35.3286	83.3385	67.5922	-9.90902	613.714	106.053	85.5038	0.414762	25.7325	12.5368	5.33285	-15.4084	114.427	133.498	112.877
Temperate diallel	P09×P22	PHN47×Qi319	1.11837	264.75	45.168	36.7421	1.23851	120.6	60.0558	43.8845	0.330033	56.4896	-6.89384	-8.54893	-0.420375	53.8838	-9.44361	-10.7917	0.458901	19.2591	34.4482	15.2708	-0.428969	46.5276	27.5349	20.8613	-0.156999	16.0737	20.0323	13.2389	0.244013	36.0339	67.3928	40.7904	-0.244823	575.852	95.6687	77.8696	0.897838	30.1332	13.2163	-5.62495	2.06666	140.795	160.451	120.482
Temperate diallel	P09×P23	PHN47×Si287	-8.42015	234.832	38.6077	37.2184	-3.73535	97.4272	59.5979	45.6738	0.178642	52.8957	-8.67179	-11.2104	0.322954	51.3482	-9.47632	-12.3808	-0.0877037	16.5982	26.7474	16.4819	-0.266594	45.4015	30.5065	29.3136	0.380884	16.6143	22.6709	17.0474	0.228662	33.0151	70.1827	54.7063	13.9002	545.97	99.8887	94.0023	-1.43807	26.0241	4.93927	-8.03035	-10.9421	102.145	104.001	82.7836
Temperate diallel	P09×P24	PHN47×Tie7922	10.8919	283.586	43.5716	26.6531	4.17396	131.389	60.1956	35.236	0.190946	55.4406	-6.87503	-6.93857	0.360219	54.191	-7.97913	-8.42402	0.622652	17.0778	31.8881	22.3689	-0.302505	45.9499	23.9069	15.7411	0.276685	17.3822	20.5415	18.6847	1.01341	35.9726	57.5524	27.5389	29.2987	622.996	82.6966	49.3452	-1.39235	24.2094	-0.522874	-11.5519	-2.84608	122.152	101.34	58.4723
Temperate diallel	P09×P25	PHN47×Zheng22	-7.41811	231.805	36.9674	35.4497	-3.18388	90.4149	57.0213	35.1889	0.682934	53.7704	-7.20842	-9.74214	0.61279	52.1094	-8.20064	-11.0819	-0.0979605	17.9095	41.7421	34.3632	1.44098	44.8678	34.0243	30.1731	-0.392426	15.0131	16.4677	5.76702	-0.209371	36.2586	104.497	101.413	-14.2163	542.206	125.393	104.722	1.02951	26.2864	3.88342	-10.3022	-11.0851	111.656	158.311	152.283
Temperate diallel	P09×P26	PHN47×Zheng58	11.8021	244.175	49.4451	42.678	3.33984	101.466	62.643	51.7122	0.705057	55.7577	-4.71514	-6.4063	0.901412	54.4223	-6.08717	-7.1352	-0.366819	17.298	27.785	14.3125	1.91461	47.0789	32.9345	29.4714	-1.10399	14.6197	11.7257	2.99553	0.428368	34.7403	73.1979	53.3301	-27.2692	510.224	88.6131	84.7448	2.90905	30.6485	17.4472	-0.778916	8.93656	130.083	148.406	115.1
Temperate diallel	P10×P11	Dan340×HZ1	-5.06672	283.999	42.3896	23.1047	1.35483	143.023	61.444	37.874	0.389512	59.3445	-5.25965	-7.6205	0.112782	57.2859	-6.0394	-7.0268	0.353851	19.1853	33.5642	19.3687	0.367183	50.861	27.8954	26.9418	-0.125678	17.8609	18.7173	14.9772	-0.108552	35.2673	64.3891	46.5386	-4.14087	630.599	89.709	74.3318	0.531678	31.4821	8.24664	-4.00745	-0.135461	146.773	157.126	109.049
Temperate diallel	P10×P12	Dan340×HZ4	-7.36742	250.658	44.1242	39.5426	-3.39221	122.069	56.5716	47.9945	-0.571216	56.115	-8.21036	-12.6477	-0.138237	54.2679	-7.64608	-11.9249	-0.387753	16.5921	40.0124	31.1017	1.01416	51.0513	31.8007	27.4167	0.203715	17.7971	23.0935	14.5665	-0.690656	33.1513	72.8048	69.7603	-8.07683	588.89	108.045	94.2996	1.32023	30.1473	18.9084	18.8261	8.71555	144.515	151.117	103.132
Temperate diallel	P10×P13	Dan340×Nan21-3	1.22517	261.125	50.9761	46.9403	1.07509	121.832	60.0964	54.7018	-0.0217044	58.5877	-6.2443	-8.79858	0.0459248	55.8811	-7.84931	-9.30675	0.0327655	17.9986	29.5866	19.0179	-0.925517	47.8546	24.4531	19.4382	-0.0266769	17.095	19.5012	10.0468	-0.00791086	34.6233	55.8029	35.2219	-2.83078	590.539	85.0503	76.1944	-0.561118	28.3577	4.10535	-2.57731	2.25349	126.934	145.696	113.796
Temperate diallel	P10×P14	Dan340×Qi205	9.44746	261.942	46.5425	38.382	4.68937	125.593	54.3524	40.6576	0.159641	58.1759	-5.21763	-9.43962	-0.059434	56.0027	-5.67792	-9.1094	-0.43407	17.3852	27.089	18.2409	2.03124	51.5494	31.8611	28.6599	0.0413203	17.54	15.6256	12.9114	0.79476	36.1544	58.4503	34.9307	13.961	630.353	81.667	61.2643	1.15095	31.288	15.667	8.90662	-0.283104	134.537	140.652	98.268
Temperate diallel	P10×P15	Dan340×Ye478	-0.507806	241.798	46.2488	43.7499	-4.58324	101.95	48.1411	38.8104	-0.0521124	58.2131	-6.51959	-9.38171	0.132866	55.9579	-7.53572	-9.18211	1.29459	20.1894	47.4707	37.1097	1.96282	50.4965	29.0619	26.032	0.0687999	16.8396	18.7468	8.4027	1.21572	37.3219	71.5275	51.2423	22.7718	626.325	102.285	98.0991	1.71906	31.2111	15.8321	9.43852	23.9074	152.593	191.128	150.669
Temperate diallel	P10×P16	Dan340×B73	10.6626	272.11	47.6414	35.782	9.46241	132.078	64.2408	51.1374	0.236044	58.9624	-6.59733	-8.2153	-0.032398	56.0347	-8.33744	-9.05746	0.295634	17.4913	40.8975	38.2067	0.560264	48.7065	29.0044	21.5645	0.772653	19.0736	24.1706	22.7838	1.26341	36.4173	80.8724	69.9496	45.546	688.797	113.384	101.102	-0.975534	23.6075	-1.36159	-6.95067	-2.01667	119.873	166.537	160.628
Temperate diallel	P10×P17	Dan340×LH132	-1.24646	245.751	49.6757	46.0998	-1.24975	111.658	60.8503	52.0291	-0.902668	55.1676	-8.06664	-14.1225	-0.638706	52.6159	-8.48836	-14.6061	-0.114736	17.3231	32.8438	29.0409	-1.26231	46.1352	22.0707	15.1469	-1.22885	15.9068	8.21284	2.39792	1.14354	34.3704	70.7002	60.3868	-24.2443	549.394	81.5962	81.2682	1.45153	29.9131	20.6279	17.903	-2.02348	118.001	152.705	138.696
Temperate diallel	P10×P18	Dan340×Mo17	-10.3925	252.927	38.3284	28.0751	-6.82623	113.746	57.1379	54.8712	-0.466354	58.0632	-10.7453	-11.8477	-0.899242	55.0361	-9.85041	-10.6782	-0.325957	19.4871	34.6692	19.6643	-1.98783	44.6191	29.7803	11.3629	-0.937354	15.2967	19.1926	-1.52952	-0.559406	39.1996	91.9832	78.21	-37.0538	600.323	124.949	98.072	-2.00129	25.3706	-4.95153	-9.4347	-14.292	114.801	194.844	161.18
Temperate diallel	P10×P19	Dan340×PH4CV	-2.67764	261.976	45.104	35.8236	-1.1525	114.096	65.3986	55.3476	0.519693	57.9134	-6.46192	-9.84824	0.575656	56.1115	-7.71818	-8.93282	-0.418473	17.5267	32.2715	26.5904	-1.09826	48.5802	25.2341	21.2492	-0.0807829	18.0204	17.7904	16.0039	-0.138223	36.5093	69.1263	50.0353	-1.99832	655.332	95.06	77.6714	-1.32893	26.8272	4.78894	3.855	7.07008	150.079	167.233	119.523
Temperate diallel	P10×P20	Dan340×PH6WC	-0.429806	269.804	43.6471	30.0629	3.46706	119.212	59.0887	55.9886	1.27257	59.148	-6.54411	-7.92638	0.475658	56.502	-7.90228	-8.29905	0.383103	19.0709	35.7369	23.485	0.657207	49.6596	27.3152	23.9433	0.197911	17.9908	18.5141	15.8134	-1.32621	32.1025	52.6666	38.2805	-21.7223	574.287	76.1371	64.5486	1.78734	33.2989	15.7771	3.56873	1.50382	138.99	153.466	111.497
Temperate diallel	P10×P21	Dan340×Chang7-2	-4.42109	253.427	47.5708	44.6025	-2.99558	127.222	58.1116	45.4271	0.176905	57.9883	-8.49409	-9.73165	0.142259	56.342	-8.74991	-8.94031	-0.192076	17.0333	42.2375	34.5878	2.22977	52.784	33.2302	31.7413	0.616348	18.9459	22.262	21.9617	0.985984	37.8893	89.8247	79.7397	44.2706	715.577	125.763	116.293	-0.716666	26.8351	7.77008	5.77097	7.04979	148.882	204.752	176.977
Temperate diallel	P10×P22	Dan340×Qi319	13.3246	283.107	56.4903	46.2232	4.91941	131.845	67.6747	57.3001	0.943434	59.9365	-4.8704	-6.69895	0.636743	57.2638	-6.13854	-7.06267	0.0391991	19.8801	35.4064	18.9877	2.09102	52.2106	32.9138	30.3102	0.966797	17.9885	27.9314	15.7986	0.581705	37.4906	68.7466	46.482	47.337	671.117	114.13	107.295	0.40301	31.8724	11.2472	-0.177894	9.96644	160.692	198.095	151.64
Temperate diallel	P10×P23	Dan340×Si287	-6.58503	242.817	44.5711	44.3559	3.36145	112.088	74.2444	52.6139	0.0130436	55.5636	-7.77994	-13.5061	0.343142	53.6913	-7.79341	-12.8607	-1.81941	15.9072	18.245	11.6326	-2.886	45.9451	22.2334	14.6724	-0.188119	16.8363	18.4512	8.38145	-3.22465	30.6808	52.7141	43.768	-61.5292	518.224	77.3197	70.9838	-2.3525	27.3437	1.90069	-3.36686	-11.4154	113.668	127.707	103.405
Temperate diallel	P10×P24	Dan340×Tie7922	4.99655	283.841	44.7744	26.767	5.58036	140.359	64.547	44.4688	0.129948	58.2131	-5.90514	-9.38171	0.265107	56.4188	-6.58482	-8.43408	0.65955	18.1554	36.4457	30.0903	-0.251912	49.1635	23.2678	22.7051	-0.466518	17.43	15.507	12.2033	1.5044	37.5826	59.7716	33.2471	9.67588	651.057	80.7901	56.0719	-0.734182	27.1016	2.76998	-0.985339	-0.766408	136.229	125.105	76.7346
Temperate diallel	P10×P25	Dan340×Zheng22	1.61691	246.99	47.2143	46.8368	1.69372	102.856	68.9942	40.0446	-0.705164	55.2158	-8.40166	-14.0475	0.141058	53.9606	-7.39608	-12.4237	0.382498	19.4307	49.5526	45.7754	-1.34082	45.249	24.7331	12.935	-0.505769	15.6908	15.7114	1.00719	-0.694379	36.8926	100.273	95.8185	-25.4752	578.63	122.827	90.9145	-1.38711	26.1038	-4.51538	-10.9253	4.93431	139.673	224.266	217.766
Temperate diallel	P10×P26	Dan340×Zheng58	-18.4083	220.115	35.9383	30.8595	-10.8257	94.8639	44.4599	29.1627	1.86486	59.751	-1.8056	-6.98771	1.3103	57.1541	-3.87104	-7.24071	-1.46232	17.2432	24.1049	13.9504	-0.669794	47.6575	24.7108	18.9463	-0.342089	16.1726	17.574	4.10897	-4.17544	31.2555	50.6384	37.9495	-78.8813	506.295	74.8073	67.0482	0.790518	30.764	9.36357	-0.404997	-30.5183	102.625	96.5433	69.6972
Temperate diallel	P11×P12	HZ1×HZ4	-15.71	268.639	30.9396	16.4466	-0.0894166	142.976	53.558	37.8279	0.522616	56.7894	-4.60942	-6.96104	0.804778	55.8811	-3.84112	-7.35969	-1.35679	16.154	19.1417	0.508328	-0.410688	49.0603	27.645	24.3012	-0.00151414	16.0737	15.0686	10.4304	-1.61148	32.4459	48.8508	34.8155	-27.8257	520.738	66.7009	43.9602	-2.41685	30.8528	6.14697	-5.92626	-28.8653	124.683	76.4129	75.2556
Temperate diallel	P11×P13	HZ1×Nan21-3	-6.58321	279.641	36.9427	21.2155	-3.65002	134.71	47.6379	29.8603	1.13313	59.3231	-2.57165	-2.81004	0.19694	56.7023	-5.48593	-5.99829	-1.46337	17.0334	9.20631	5.97985	-0.19826	48.0157	25.8499	21.6545	0.640694	16.2442	17.5762	11.6018	-2.44833	32.3983	30.4497	26.5321	-16.2109	528.755	51.7479	46.1767	-0.294798	33.0666	6.83135	0.823871	-11.192	131.237	102.555	86.9202
Temperate diallel	P11×P14	HZ1×Qi205	-4.41381	274.405	30.6734	18.946	-2.87123	135.636	40.5373	30.7523	0.241573	57.8384	-3.24402	-5.24245	0.300981	57.0333	-2.88303	-5.44956	0.432397	18.7826	22.062	16.8632	-1.59981	47.3522	22.0576	19.9734	0.188991	16.1695	10.1446	9.21648	0.765539	36.3406	42.8997	35.6256	19.1911	587.18	56.0392	50.2192	-0.610126	33.9695	10.424	3.57692	0.424759	152.994	121.623	117.909
Temperate diallel	P11×P15	HZ1×Ye478	7.64782	276.278	40.5434	19.7577	6.87756	131.014	56.0361	26.2973	0.60922	58.455	-3.65447	-4.23226	0.397781	56.893	-4.97387	-5.68215	1.28496	20.7107	34.4969	28.8596	1.37287	49.3404	27.0774	25.0108	0.424001	15.6766	14.4973	7.70245	2.6184	38.94	59.7742	57.7994	55.209	610.359	80.0758	68.7362	1.52408	35.4587	15.6594	8.11766	22.4721	168.907	157.707	140.573
Temperate diallel	P11×P16	HZ1×B73	12.6153	300.387	39.3586	30.2083	7.6944	147.914	54.7829	42.5885	-0.243724	58.0632	-5.62865	-6.37127	-0.0880828	56.6492	-6.34019	-6.59269	-0.5934	17.1332	21.3193	6.6008	-0.499079	47.081	25.6936	19.2863	-0.134575	16.6482	11.9478	9.61922	0.250616	35.6199	56.5876	48.0038	-1.34755	593.5	68.5519	64.0757	0.913686	29.9393	8.29484	-8.71163	11.3528	150.991	159.872	115.056
Temperate diallel	P11×P17	HZ1×LH132	9.54746	282.869	44.739	22.6147	1.65244	132.164	56.2922	27.4058	-0.468536	55.1823	-5.52181	-9.59398	-0.366391	53.5584	-5.78815	-11.2103	1.10463	19.0734	29.3252	18.6725	1.21594	48.0473	28.1429	21.7346	0.376225	15.9937	12.5512	9.8808	-0.47688	32.9654	44.9137	36.974	2.31991	527.555	58.971	45.8448	1.33255	34.2367	20.0843	4.39164	-6.47102	131.302	119.484	87.0131
Temperate diallel	P11×P18	HZ1×Mo17	-4.05845	285.586	33.3948	23.7923	3.24926	141.425	61.5718	36.333	0.0557784	58.1659	-8.33173	-11.6918	0.0816732	56.6872	-6.15052	-6.27736	-0.53919	19.8048	22.4139	21.6152	0.557028	46.5978	36.7236	18.0621	0.256817	14.9727	21.2934	2.86627	-0.0803269	39.8941	73.2146	65.7634	9.06078	598.035	101.909	65.3292	-1.41237	30.4021	-0.0095379	-7.3005	9.49672	156.338	200.282	122.672
Temperate diallel	P11×P19	HZ1×PH4CV	6.93099	297.908	40.6633	29.1339	-0.0365086	132.815	57.8748	28.0334	0.114825	57.0891	-5.34599	-6.47004	-0.0945288	56.1115	-6.7249	-6.97773	-0.273006	18.2031	21.6886	13.2576	0.287501	49.3998	28.3353	25.1613	-0.0944117	16.4886	11.3395	9.46352	0.489656	37.3526	54.3474	53.5009	5.51975	614.447	68.2106	66.5867	-0.830106	31.7686	8.37384	-3.13388	3.65474	164.412	137.288	134.172
Temperate diallel	P11×P20	HZ1×PH6WC	3.92052	300.479	37.1615	30.2481	2.01615	135.365	50.2734	30.4916	-0.816503	56.6395	-8.18534	-9.14363	-0.738627	55.9579	-7.81623	-8.39279	0.61987	19.8386	25.8946	23.4335	0.347164	48.7834	26.0341	23.5996	-0.0733177	16.2014	10.2819	9.27473	1.10177	34.7459	46.9718	44.3721	16.2758	563.882	58.6766	55.8877	1.88906	37.8432	16.534	15.3883	12.0439	167.279	146.13	138.255
Temperate diallel	P11×P21	HZ1×Chang7-2	5.18243	289.355	42.5551	25.4262	1.65122	149.473	56.3386	44.0911	1.04594	58.4379	-5.39483	-6.5028	0.931574	57.8015	-5.39404	-6.58147	-0.792209	16.9641	23.9753	5.54868	-0.825676	49.1624	25.0319	24.5598	-0.865281	15.9461	6.25952	3.15759	-2.18884	34.9299	54.7385	45.1367	-64.2728	558.63	61.3234	54.4358	0.568154	32.5625	13.803	-0.713188	-3.38755	156.193	152.001	122.466
Temperate diallel	P11×P22	HZ1×Qi319	-2.17919	293.927	38.5436	27.4082	-2.8986	141.631	51.0306	36.5315	0.270366	58.844	-4.16958	-4.73739	1.05216	58.3494	-3.33318	-3.39855	-0.705834	19.666	19.9878	17.7062	-0.987919	48.5655	24.5819	23.0475	0.0644187	15.5679	14.7093	6.95579	-2.34462	34.7797	40.0687	35.8901	-31.939	543.438	58.5585	50.2357	-0.66407	35.2479	8.91487	7.47491	-12.2423	156.232	133.063	122.52
Temperate diallel	P11×P23	HZ1×Si287	-5.19581	270.531	35.8073	17.2665	-4.95526	121.375	52.7252	17.0048	0.170176	55.3013	-5.71012	-9.39902	0.580157	54.5985	-5.18106	-9.486	-0.413508	17.844	17.6973	11.0235	0.847255	49.1122	31.7061	24.4327	-0.118848	15.3874	12.1179	5.71537	0.0530327	34.1739	50.5213	41.9954	-3.71626	527.633	64.0785	45.8665	-0.727978	33.4108	9.37721	1.87338	-6.31127	136.521	116.54	94.4465
Temperate diallel	P11×P24	HZ1×Tie7922	-1.62463	303.544	33.542	31.5769	-3.15384	149.229	48.5674	43.856	-0.34982	57.3139	-4.89782	-6.10174	-0.405078	56.4188	-5.57246	-6.46828	0.165517	18.1923	21.1677	13.1904	0.196044	49.0453	23.8995	23.5379	-0.240847	16.1375	10.5263	10.1859	1.58028	37.8739	44.9106	34.2798	17.4077	610.386	56.7351	46.3222	-0.606662	31.6717	5.27808	-3.42934	-3.44315	151.301	105.444	96.2875
Temperate diallel	P11×P25	HZ1×Zheng22	1.51813	273.216	37.2799	18.4304	-3.07139	115.695	52.213	11.5294	0.667368	56.1689	-4.27858	-7.97761	0.754594	55.2443	-4.12771	-8.41538	0.0757647	19.6549	33.7	22.2905	-0.808068	45.2156	25.676	14.5601	-0.329058	14.3493	9.78092	-1.41665	-0.3467	37.4557	78.0679	55.6316	-15.4732	540.229	86.9322	49.3486	0.287206	32.2207	3.7672	-1.75538	-1.35053	151.136	168.92	115.263
Temperate diallel	P11×P26	HZ1×Zheng58	1.04481	265.893	37.6484	15.2561	5.21173	128.505	59.0157	23.8784	0.59649	58.0632	-2.00122	-4.87415	0.365715	56.8797	-3.27922	-5.7042	0.00264631	19.2391	23.3098	19.7035	0.152462	47.9136	26.3689	21.3958	-0.0078175	14.9887	12.9871	2.97619	-0.179762	35.4666	51.8129	47.3667	-3.1808	533.593	67.2963	47.5139	-0.153962	34.2621	7.5978	4.46909	6.8757	157.767	141.446	124.708
Temperate diallel	P12×P13	HZ4×Nan21-3	-0.331609	254.851	42.6395	41.8773	-0.253757	121.899	51.2073	47.7888	-0.8553	55.0659	-7.2718	-9.34102	-0.699579	53.0388	-8.21562	-11.1079	0.205129	16.8503	28.7875	11.4246	0.814812	48.5721	30.8544	29.8685	0.193187	15.4035	16.4357	15.1053	-0.759435	32.5533	44.2547	27.1375	-4.01197	503.181	68.2326	50.1301	2.29145	33.5295	23.1712	15.1904	9.48676	140.806	115.771	97.919
Temperate diallel	P12×P14	HZ4×Qi205	3.97029	251.748	36.4795	32.9966	2.74873	125.048	45.5983	40.0482	0.103945	55.432	-4.87508	-5.27181	0.102752	54.0681	-4.33677	-5.36336	-0.165407	16.3332	26.8687	11.086	-0.961036	47.5343	25.882	24.6932	-0.250116	15.3372	8.82425	3.59473	0.383536	34.4247	48.6287	28.4753	-1.75796	528.457	61.6286	35.1961	-1.39037	31.0659	14.9205	8.13354	-10.4231	131.037	88.5423	84.1867
Temperate diallel	P12×P15	HZ4×Ye478	7.56002	245.149	43.3254	36.4759	4.39012	112.32	53.1538	36.1744	-0.361208	55.2158	-6.67884	-8.44092	-0.535838	53.1924	-7.7541	-10.4826	-0.301046	17.2731	34.0559	17.3046	0.413945	47.9248	26.8083	25.5062	-0.253736	14.6057	11.4514	9.14356	1.1082	35.8959	62.4058	45.4636	8.03339	525.409	81.4257	66.1809	-0.27277	31.5385	17.1235	10.5865	6.90403	142.229	115.47	99.9193
Temperate diallel	P12×P16	HZ4×B73	-13.2496	243.481	28.1378	21.4962	-7.68484	116.327	36.9592	33.1137	-0.0730524	55.9651	-6.75832	-9.75452	0.835298	54.8056	-5.9564	-9.63255	-0.392803	15.4822	33.3666	27.19	0.362293	47.4857	30.3728	26.9637	-0.826473	15.5631	8.94951	2.4745	-2.00282	31.8326	55.4455	48.554	-53.4663	503.608	66.3323	47.0341	1.71654	28.6188	19.6647	12.9578	-4.9249	123.604	111.041	73.739
Temperate diallel	P12×P17	HZ4×LH132	1.90486	244.185	43.7237	35.9393	-1.6668	112.638	52.345	36.5601	-0.264364	53.1177	-6.65171	-8.46321	-0.27001	50.8878	-6.87003	-8.9763	0.743927	16.8611	37.8132	25.5995	0.521715	46.8964	28.6202	25.3881	0.0516179	15.2759	12.1295	10.1776	0.951516	32.8599	60.4566	53.3381	15.7192	503.181	78.1101	66.6225	0.649602	31.4304	26.8364	24.0551	7.67619	134.34	122.825	88.8299
Temperate diallel	P12×P18	HZ4×Mo17	0.0597464	258.663	37.181	30.9794	4.27002	126.238	64.15	53.0493	0.20075	56.0421	-9.53342	-14.9161	0.473454	54.312	-6.67247	-10.2044	0.0977063	18.5901	36.0427	14.1561	2.0746	47.6587	44.2114	27.4263	0.41091	14.7336	25.3124	10.0993	0.73347	39.174	88.6785	78.0936	27.783	578.983	134.553	120.118	0.908878	30.6	14.7154	9.23266	8.42913	144.161	174.433	102.634
Temperate diallel	P12×P19	HZ4×PH4CV	7.03959	266.976	43.3399	38.4161	4.47065	121.115	64.7812	46.838	-0.638503	54.067	-8.06292	-9.2662	-0.744248	52.6948	-9.06819	-12.1658	0.28179	16.9063	35.847	22.1095	-0.336726	48.3189	28.9921	28.7934	-0.103819	16.086	13.1017	6.79077	0.964053	36.2931	65.4873	49.1469	11.2053	582.359	84.3262	57.8871	-0.560254	29.9151	16.9307	15.8091	4.07555	153.724	120.378	116.076
Temperate diallel	P12×P20	HZ4×PH6WC	3.21372	268.731	38.8542	29.5455	2.03891	119.181	50.0016	44.4928	0.00226917	55.1895	-8.29902	-11.4696	0.359654	54.2892	-7.19057	-11.1246	0.0420663	17.4092	31.4452	12.7254	-0.873264	47.1063	25.0414	24.1466	-0.501325	15.3802	9.04695	3.73593	0.29677	32.407	51.6337	39.5921	-12.2564	497.577	62.5958	42.5689	0.32651	34.1573	18.8342	6.23859	-0.129514	143.996	110.427	102.403
Temperate diallel	P12×P21	HZ4×Chang7-2	-21.4591	231.672	30.5616	28.9733	-3.59682	128.017	50.6407	46.3361	2.11581	57.239	-5.02202	-8.42097	1.54766	55.6506	-5.5006	-10.0577	-2.54071	13.364	19.644	18.322	-3.8853	45.6461	19.2242	16.5306	-0.472088	15.9461	10.5828	3.15759	-4.81024	30.7746	51.5677	45.9889	-93.949	491.181	65.417	48.4664	-4.52159	25.3494	1.87533	0.0535605	-43.188	105.283	68.594	47.9877
Temperate diallel	P12×P22	HZ4×Qi319	5.25701	270.322	44.8515	39.6201	-1.79704	126.525	52.1651	50.953	1.30874	57.6136	-3.81631	-6.72929	1.50444	56.0347	-3.64454	-7.2307	0.695862	19.2161	38.4809	15.0134	-0.549747	48.547	27.9275	26.1069	-0.0259385	15.0844	16.1683	12.7207	0.94948	36.5399	61.9594	42.7674	15.5615	553.165	88.5416	70.8621	0.273882	34.0625	18.9644	6.68134	-1.35609	156.009	131.122	119.288
Temperate diallel	P12×P23	HZ4×Si287	-7.90641	236.779	36.3406	31.8163	-4.8652	105.257	52.8878	27.6125	0.885348	53.7477	-5.94596	-7.37754	1.30994	52.5613	-5.08057	-5.98289	-0.564142	15.8418	25.2584	11.1736	-1.46895	46.3393	27.8139	23.8986	-0.286855	14.8262	12.8532	10.7913	-1.19607	31.3909	53.6179	47.0954	-24.9262	468.65	72.1529	66.5279	-1.46653	30.5489	13.9199	7.96038	-0.556095	131.167	106.52	84.3698
Temperate diallel	P12×P24	HZ4×Tie7922	15.7574	289.885	43.6726	29.4663	8.10182	144.277	60.6314	48.5014	-0.179148	55.2158	-6.03301	-7.18926	-0.0963168	53.9606	-6.22246	-8.8134	0.313913	16.4891	31.9075	18.1506	0.980017	49.3726	28.0715	24.3624	-0.0709537	15.9142	13.5601	8.66125	1.76488	36.5246	53.0355	29.496	25.4716	580.676	70.7405	39.2002	1.16389	31.3189	18.8412	14.4224	16.9843	160.619	116.724	108.377
Temperate diallel	P12×P25	HZ4×Zheng22	-3.01547	237.641	36.9797	32.2962	-1.60063	100.958	54.4126	22.4003	1.53344	54.7662	-4.2127	-5.62238	0.701475	52.4242	-5.39812	-6.22812	-0.883339	16.8442	38.2134	26.3707	-0.402096	45.1649	29.2496	20.7585	0.320535	14.6057	16.9939	9.14356	-1.9519	34.3166	82.8736	75.7275	-14.2291	503.7	110.179	91.4964	-1.06984	28.7403	5.19619	-1.92865	-8.46102	132.917	134.554	86.8293
Temperate diallel	P12×P26	HZ4×Zheng58	6.78431	240.591	43.5222	33.9385	3.68849	110.775	57.829	34.3013	-1.23894	53.959	-6.55504	-7.01341	-1.0013	52.7457	-6.81128	-7.94142	-0.175257	17.2096	31.4854	13.7283	0.600635	47.9051	29.8885	28.0851	-0.254625	14.3487	13.1677	7.22308	1.11304	35.2255	67.0029	55.4715	8.23754	507.237	88.1406	83.6635	2.03079	34.3235	22.0935	11.1185	6.43921	146.222	122.19	105.531
Temperate diallel	P13×P14	Nan21-3×Qi205	2.36647	252.019	37.3412	33.1398	5.12613	122.721	46.0599	37.4418	0.587157	57.8384	-3.00168	-4.77646	0.102624	55.497	-4.96991	-6.98801	-0.472888	17.0117	14.0737	12.4919	-0.294808	46.9435	25.2521	23.1434	0.255993	15.3716	10.2647	3.82709	0.54418	35.3746	35.0186	32.0204	16.2875	542.906	49.5515	38.8925	-1.68422	30.8638	6.72665	6.03238	-5.17929	125.161	96.7512	84.45
Temperate diallel	P13×P15	Nan21-3×Ye478	-3.95109	235.513	38.4686	32.5277	-1.86788	101.357	41.8116	28.7029	-0.149396	57.3508	-5.24116	-5.57923	0.142024	55.2993	-7.12852	-7.31935	0.601773	19.1619	28.3983	26.7104	-0.987627	45.2662	20.6735	18.5438	-0.567128	13.8206	6.70556	5.69214	3.09414	38.6711	53.8178	51.0307	24.6839	538.463	65.3425	60.6569	-2.63942	29.2636	1.56176	0.534906	-3.14433	121.062	101.357	98.8711
Temperate diallel	P13×P16	Nan21-3×B73	5.50193	264.108	39.6986	31.7887	-0.944437	118.363	42.4843	35.4433	0.62636	58.5877	-4.54446	-5.5255	-0.28644	55.1129	-8.38489	-9.12585	0.465915	17.3269	26.9598	14.5762	-0.360779	45.5056	25.9106	23.531	0.443026	16.3609	15.7737	7.72751	0.397228	35.0219	48.9245	36.7787	17.5195	570.997	68.5166	66.7089	-1.47521	25.5188	-1.09701	-12.3303	-9.74916	107.66	104.356	81.3333
Temperate diallel	P13×P17	Nan21-3×LH132	-2.16185	241.993	43.2428	36.1744	-2.651	106.949	48.3935	35.8035	0.764648	56.0699	-3.75604	-7.68807	0.087452	52.6743	-6.80727	-11.7188	0.269045	17.3722	21.709	14.8757	-0.520757	44.5969	23.2662	21.0642	-1.04817	13.7044	1.73608	-1.15689	0.242061	32.9397	40.0661	28.6466	-26.8972	456.967	43.4406	36.3417	1.92075	32.7933	22.9766	12.6612	-5.33037	110.214	102.586	85.6348
Temperate diallel	P13×P18	Nan21-3×Mo17	2.78653	263.264	40.3358	33.3095	7.44962	124.713	66.1969	58.3609	-0.739638	57.0249	-9.9179	-13.424	-0.023284	55.2443	-8.0415	-8.66295	0.436225	19.9146	26.8147	22.2895	-0.466372	43.8607	33.8604	19.0657	-0.157882	13.6931	17.9973	4.71709	1.69801	40.9278	71.9616	59.8442	16.4498	564.053	99.3753	68.2921	-1.04857	28.7343	0.607652	-1.2835	12.9903	137.603	195.004	131.766
Temperate diallel	P13×P19	Nan21-3×PH4CV	-1.49503	260.316	40.4883	34.9632	2.58365	114.523	59.8691	45.4219	-1.10849	55.5202	-7.71872	-8.59308	-0.618486	54.2496	-9.32709	-9.5742	-0.646991	16.9635	17.1197	12.1732	0.908701	48.3073	29.9387	28.7625	0.0367895	15.7549	11.9776	4.59268	-0.480182	35.6381	42.7277	39.1853	-7.38775	560.168	59.137	51.871	0.568098	31.1352	13.344	6.96478	5.91249	144.442	126.154	111.276
Temperate diallel	P13×P20	Nan21-3×PH6WC	-1.93479	265.457	37.8463	27.9674	4.45931	116.897	50.6627	48.4351	0.136881	57.2473	-6.97486	-8.16864	0.325716	55.6843	-7.77012	-8.84069	-0.221515	18.1316	18.6371	17.403	-0.226736	46.4958	24.3511	22.5376	-0.470717	14.9391	7.08042	0.76081	-0.214885	32.6846	33.8976	27.6503	-14.6199	491.616	43.7114	40.861	-0.978538	32.944	7.55574	2.46489	-4.71107	128.295	105.127	95.223
Temperate diallel	P13×P21	Nan21-3×Chang7-2	-7.33828	247.668	40.3353	39.3677	-6.19482	120.715	45.2344	37.9885	-0.735379	56.311	-8.61712	-9.90572	-0.756783	54.7752	-9.86488	-11.4726	0.712506	17.6032	33.2707	16.4033	-0.330376	47.944	26.1546	22.397	0.40292	16.3494	14.5948	5.76659	0.0453047	36.4194	56.0222	42.2366	11.8831	593.416	78.2031	77.0528	0.962458	30.9252	15.527	6.24332	-15.8873	121.465	114.746	104.585
Temperate diallel	P13×P22	Nan21-3×Qi319	1.03089	267.971	44.3339	38.4057	3.62056	127.238	56.5331	51.8036	-0.23975	57.9883	-5.33288	-6.12268	0.229001	56.1883	-6.40642	-6.9764	0.879681	20.3859	28.0912	22.015	-0.337319	47.5024	26.1113	23.3934	0.28617	14.9248	16.3089	14.1364	0.635625	37.0153	44.5944	44.5639	21.2961	555.302	68.5512	65.6812	-0.769766	33.1106	8.49336	3.70006	1.84675	148.092	140.352	131.909
Temperate diallel	P13×P23	Nan21-3×Si287	-2.62712	243.933	41.2407	37.2661	-5.4217	99.9964	49.2896	26.9754	0.31316	55.0987	-5.81572	-9.28702	0.0771	52.7575	-7.85497	-11.5794	0.0684763	17.4604	18.8907	15.459	1.05005	47.6013	32.3232	29.22	0.140453	14.7818	13.8402	13.0429	-0.710126	32.6661	39.1666	27.578	-2.74427	487.235	58.0424	45.3724	4.44443	36.5516	27.348	25.5728	5.29268	125.896	118.467	112.049
Temperate diallel	P13×P24	Nan21-3×Tie7922	1.90666	277.909	38.3955	24.1177	5.05552	136.526	55.2245	40.5235	0.595264	57.9134	-3.66432	-4.65298	0.471965	55.9579	-5.82847	-6.21555	0.945032	18.1062	24.5328	19.7294	-1.15796	45.9776	20.1432	15.8108	-0.301345	15.2121	9.74757	3.86735	1.37432	36.9233	37.2358	30.9095	10.275	561.882	49.3742	34.6949	-0.980658	29.2661	3.63497	0.543495	2.0725	134.588	97.2667	74.6053
Temperate diallel	P13×P25	Nan21-3×Zheng22	-17.3712	225.16	30.5077	26.7022	-12.9388	84.9155	33.6886	7.82565	-0.230348	54.9256	-6.15853	-9.57201	-0.106564	53.0452	-7.41869	-11.0972	-0.34722	18.3663	29.1047	21.4494	0.279232	44.5892	28.6395	21.0433	-0.429757	13.3837	8.53491	2.35097	-2.21066	34.8471	59.8238	36.096	-45.1928	469.139	70.1522	39.9733	1.17301	31.0749	6.39648	6.03777	-11.0113	119.247	134.822	100.849
Temperate diallel	P13×P26	Nan21-3×Zheng58	0.186999	235.869	41.5154	32.728	2.24139	104.623	53.1327	32.85	-0.190626	56.9305	-3.67016	-6.2712	0.071958	55.248	-5.52853	-7.40533	0.563861	18.9347	25.1682	25.1285	-0.663538	45.3839	24.0001	23.2006	0.0205837	14.1522	12.9804	8.22803	0.69955	35.6013	47.5333	39.0414	10.0959	505.499	65.3738	50.8217	-1.43406	30.9504	3.17316	0.198452	4.92025	133.583	122.924	120.889
Temperate diallel	P14×P15	Qi205×Ye478	-1.5954	230.464	31.0387	21.752	2.5337	105.905	38.0024	18.6086	-0.198251	56.7088	-4.5492	-5.96522	0.247765	55.632	-4.53834	-6.37701	0.790537	19.2041	30.5149	30.4183	-0.214675	46.7772	22.6039	22.5009	0.649469	15.4142	11.5641	4.11483	-0.531388	35.774	39.0045	33.511	14.7163	551.518	56.0055	41.0957	-0.393446	32.7278	14.3359	13.9182	-4.31092	130.035	102.027	91.6331
Temperate diallel	P14×P16	Qi205×B73	4.06262	255.263	31.0078	27.3755	1.07205	120.526	36.4352	34.9836	0.545205	57.9134	-3.90306	-6.61283	-0.129299	55.497	-5.76143	-8.49252	0.17128	16.8857	25.6578	14.8437	1.05007	47.6545	29.5558	25.0085	0.00222306	16.2971	8.67523	7.30742	1.8768	37.2299	54.4069	38.9445	29.3975	605.897	65.2312	55.0077	0.580562	28.7928	12.417	0.221378	9.76695	137.316	141.223	102.363
Temperate diallel	P14×P17	Qi205×LH132	6.76035	243.511	39.3641	28.6446	3.49298	113.239	46.4184	26.8226	-0.656506	54.0556	-5.40914	-7.62395	-0.267707	52.5461	-4.9022	-8.02733	0.11711	17.0737	21.4013	16.1223	1.02699	46.8827	27.3255	22.9839	-0.151577	14.978	4.48625	1.16852	-1.82487	31.6012	31.0587	17.9378	-32.4411	474.446	36.9508	21.3783	1.62093	33.7117	27.3247	17.343	-9.55856	116.126	98.0116	71.1351
Temperate diallel	P14×P18	Qi205×Mo17	5.58733	258.66	33.753	30.9781	-4.8734	112.537	40.1316	26.0359	0.592108	57.7635	-7.12054	-12.3027	-0.228043	55.2665	-6.02238	-8.62625	1.22779	20.5596	32.6939	26.2502	-1.18432	43.8808	31.349	15.1093	0.282015	14.51	16.3691	-1.99257	0.583686	40.5419	66.1856	51.3051	18.0198	588.646	89.4154	50.5942	-1.1674	29.8337	5.15413	3.84452	-10.0976	124.655	144.965	83.7043
Temperate diallel	P14×P19	Qi205×PH4CV	-5.51473	248.892	30.2522	29.04	-1.83467	110.252	43.3623	23.4767	0.276354	56.3119	-4.64136	-5.49887	0.190655	55.2857	-5.59603	-7.84718	-0.170527	17.2934	21.1514	17.6166	1.01695	49.1536	29.9713	28.941	0.167387	16.2625	8.89544	7.9625	-0.236332	36.6104	43.2091	36.6325	1.66206	592.241	55.9089	51.514	2.01147	33.7968	23.8872	17.6392	7.9495	156.619	129.946	129.088
Temperate diallel	P14×P20	Qi205×PH6WC	-13.7366	246.251	24.1399	18.7085	0.292396	112.876	36.2306	26.4159	0.871527	57.3888	-5.02985	-7.94166	0.986857	56.5724	-4.2905	-7.3868	-1.01805	17.1885	14.0309	11.2964	0.127616	47.5882	25.1249	24.8346	0.254981	16.0418	8.27605	8.19827	-1.46821	32.1597	28.6123	20.0222	-14.5765	514.682	39.1239	31.6719	-0.787666	34.3531	12.8538	6.84758	-3.35816	139.788	109.305	106.006
Temperate diallel	P14×P21	Qi205×Chang7-2	-1.50359	246.098	35.0156	30.0114	-3.50794	123.548	39.7831	38.368	0.860666	57.3139	-5.28131	-8.30113	0.583058	56.342	-5.31234	-8.94031	0.34757	17.0917	31.4857	16.2448	-0.837024	48.1754	24.6583	22.9877	-0.345483	15.978	5.59429	3.36395	-0.240624	36.8619	53.9926	37.5711	-14.9631	589.592	63.3857	50.8364	-0.22977	30.9512	16.4479	7.73429	1.18061	148.673	144.51	119.099
Temperate diallel	P14×P22	Qi205×Qi319	-6.88861	252.647	31.9641	30.4907	-3.49226	120.272	38.9565	34.6986	-0.395904	57.239	-4.82944	-7.33573	-0.382058	55.8042	-5.04201	-7.61231	0.0992451	19.4589	23.899	16.4667	-0.734867	47.8429	24.8873	24.2779	0.260267	15.2759	11.5322	3.18068	-0.230804	36.8773	40.7831	37.6286	5.47957	562.508	57.4262	43.9075	-0.958394	34.1402	12.5654	6.9247	-1.05894	155.327	135.854	128.905
Temperate diallel	P14×P23	Qi205×Si287	8.33067	247.486	38.6493	30.7448	2.59478	108.159	49.7017	21.1334	0.359605	54.552	-4.94445	-6.77565	0.472941	53.3803	-4.65718	-6.56721	0.186641	17.432	20.4167	18.5592	-0.118293	47.171	28.8287	23.7402	-0.0812493	14.9371	7.8565	0.892266	0.110745	34.2154	42.1634	27.6942	0.429341	513.431	52.7372	31.3519	0.0745984	33.4	17.1404	16.258	2.23129	132.975	114.928	95.9656
Temperate diallel	P14×P24	Qi205×Tie7922	-0.418946	268.179	29.8067	19.772	3.334	134.951	44.7626	38.9024	-0.600191	56.1248	-4.88112	-5.66135	-0.626494	55.0864	-5.2752	-6.91091	0.622096	17.6367	23.0788	19.9514	1.4665	49.3401	26.8031	24.2805	-0.686648	15.2038	3.24916	2.69368	0.293292	36.5707	32.9844	29.6594	-18.4665	556.163	37.6584	33.3239	3.36451	34.8295	24.1682	21.2338	7.66901	150.325	107.434	95.0212
Temperate diallel	P14×P25	Qi205×Zheng22	1.76731	236.894	32.8498	25.149	4.15635	102.157	48.5148	14.4112	-0.326403	54.2364	-5.54252	-7.31498	-0.279922	53.0988	-5.22928	-7.05993	0.604244	19.1712	36.7789	30.3879	0.319084	45.3671	28.5043	19.0082	-0.11696	14.0735	6.65298	-4.9409	0.521012	38.3072	71.0261	42.9651	2.17097	539.525	77.7229	38.0276	0.682182	31.8023	9.59753	8.5199	7.65723	148.056	169.073	118.19
Temperate diallel	P14×P26	Qi205×Zheng58	-4.77921	223.498	29.5908	18.0719	0.24877	102.777	39.661	15.105	-0.93752	55.5905	-4.13488	-5.00102	-0.751001	54.652	-4.47801	-4.6143	-0.316354	17.9079	20.0448	18.3431	-0.585486	46.2	24.0545	21.193	-0.445419	14.0632	5.02293	-5.01047	0.373151	36.0033	45.6091	34.3667	-9.2904	509.135	52.6505	30.2528	-0.415286	33.1874	11.3329	7.44049	-1.13364	137.67	114.553	102.884
Temperate diallel	P15×P16	Ye478×B73	-17.1195	223.892	23.4035	11.7213	-11.8265	93.2575	23.045	6.71477	-0.205248	57.4119	-6.12874	-7.42151	-0.138499	55.2507	-7.96826	-8.89864	1.20134	18.9913	41.2124	28.9732	0.703733	46.3237	25.8279	21.3132	0.797803	16.3648	16.828	7.75319	0.43826	36.5379	58.498	48.0652	33.3589	597.019	81.278	74.3066	-0.644534	26.9227	5.54797	-5.59831	-17.5561	103.859	94.3684	70.6119
Temperate diallel	P15×P17	Ye478×LH132	3.93648	230.498	42.8869	41.8802	4.99437	100.37	54.9132	53.4961	-0.07016	54.8909	-5.42802	-8.97967	-0.343507	52.2332	-7.38679	-12.0968	0.382271	18.4144	30.8329	25.0553	0.528176	45.3994	23.1897	18.8927	0.407903	14.8096	10.9637	6.81438	0.682193	34.8548	51.1922	41.2446	22.4607	516.508	67.1127	63.3656	0.51203	31.9578	21.1808	12.0567	-1.5275	118.023	113.983	93.879
Temperate diallel	P15×P18	Ye478×Mo17	6.00866	248.892	38.2955	26.032	1.25929	104.299	53.9249	46.2282	0.501754	57.9221	-8.18629	-12.0619	0.582857	55.8403	-6.85933	-7.67757	-0.31085	20.0965	29.6139	23.4065	-0.206739	43.8739	31.2022	14.8977	-0.494005	13.0061	13.2896	1.38916	-2.07415	38.6306	65.5365	56.5456	-50.5492	507.237	85.5211	60.4333	3.80421	34.1603	20.851	19.7796	8.44544	137.064	189.189	125.158
Temperate diallel	P15×P19	Ye478×PH4CV	-1.5775	242.64	36.5681	25.7987	-1.71478	96.0014	49.1721	48.7955	0.280101	56.5646	-5.64295	-6.20434	0.101255	54.9592	-7.95245	-8.39141	-0.440966	18.0985	26.6949	22.91	0.668934	47.8211	26.3407	25.2346	-0.219034	15.1482	8.62429	0.564957	0.0353291	37.6286	53.5526	52.4851	-7.81149	569.928	66.3994	54.517	0.149574	31.2899	15.1407	9.71482	-9.83064	132.704	105.36	94.1081
Temperate diallel	P15×P20	Ye478×PH6WC	7.69913	257.497	39.2251	24.1301	2.84549	101.059	43.7364	32.235	-0.201627	56.5646	-7.75942	-9.26377	-0.235543	55.1129	-8.53079	-9.77611	0.59341	19.8755	31.7615	28.6948	-0.0470035	46.4291	21.9743	21.5893	-0.29364	14.7653	6.78523	-0.411431	-0.579154	33.7953	41.1301	36.9512	-16.7194	499.7	50.2461	43.1773	1.29744	35.7932	17.9915	11.3267	-2.0462	134.966	113.23	105.374
Temperate diallel	P15×P21	Ye478×Chang7-2	3.95345	241.366	42.9395	37.7203	3.01815	115.704	52.5683	32.2608	-0.0366872	56.6655	-7.7173	-9.33854	0.118758	55.6406	-8.25574	-10.0739	-0.414269	17.4054	33.7868	18.2031	-0.924243	47.1037	21.7841	20.2518	-0.575603	15.02	6.20132	-2.83348	0.164236	38.0133	66.1529	54.0441	-19.4894	572.227	76.8852	72.9637	-1.34217	29.1938	10.2714	2.36507	0.377771	141.736	147.299	132.833
Temperate diallel	P15×P22	Ye478×Qi319	-4.71738	244.629	37.4041	26.3495	-2.26717	107.127	44.7551	27.8093	0.479042	58.3629	-4.38307	-5.51624	0.392842	56.342	-5.95835	-6.72194	-0.802594	19.6326	24.9183	17.5063	-1.66489	45.9284	19.7894	19.3048	-0.320353	13.9674	9.91159	8.88298	-1.31474	36.5399	45.372	42.7674	-31.0243	513.165	60.3851	58.507	-2.55869	31.8949	5.52752	-0.107425	-11.4988	138.752	122.48	117.283
Temperate diallel	P15×P23	Ye478×Si287	5.52681	234.493	42.0456	39.8234	0.38657	91.581	53.3973	42.6644	-0.757148	53.6842	-7.89244	-10.9806	-0.886159	51.7841	-9.361	-12.8526	0.126602	18.4475	27.3357	25.2801	0.293088	46.5979	27.152	22.0313	-0.45287	13.8376	7.59768	7.32562	-0.315594	34.5356	50.098	39.9511	-16.1672	483.995	61.9819	53.082	0.823702	33.5041	17.9396	17.4787	1.70825	126.318	116.377	107.505
Temperate diallel	P15×P24	Ye478×Tie7922	-7.93481	250.474	29.6559	11.8647	-6.86791	110.379	36.8206	13.6109	0.939456	57.9134	-3.3158	-3.96775	0.789406	56.2652	-5.11555	-5.3114	-1.71354	16.3766	14.1982	11.2163	-1.36622	45.5229	16.8965	14.6655	-0.490069	14.6725	6.81163	0.182989	-3.07195	33.952	28.4064	20.375	-62.2267	499.564	36.2474	19.7559	-1.85128	28.9687	3.66215	1.57578	-5.11203	131.409	90.5093	70.4815
Temperate diallel	P15×P25	Ye478×Zheng22	5.01735	229.955	39.4494	37.4139	2.92334	86.554	53.9073	34.8334	-0.570056	54.2417	-6.9826	-10.0562	-0.410122	52.7315	-7.76885	-11.2583	-0.0803949	19.5621	39.4593	32.8496	0.223865	44.2874	25.3321	15.9805	0.34292	13.8055	13.0945	7.62089	-0.645027	37.8877	77.5473	53.5351	1.92483	526.44	97.7468	66.5068	-0.943215	29.5319	2.14268	0.772551	-3.10497	131.159	154.513	115.459
Temperate diallel	P15×P26	Ye478×Zheng58	-10.8031	207.285	30.3275	27.5917	-8.75164	79.4061	30.0844	23.6984	1.61547	58.3924	-0.832925	-3.17347	1.3866	56.5525	-3.09475	-4.8279	-2.04791	17.2519	15.5627	14.0079	-2.27171	43.5293	16.7826	13.9952	-0.39624	13.3845	7.92167	4.33898	-6.62539	29.7513	25.7077	20.5634	-96.6189	408.967	38.0841	29.3515	-0.769083	32.1886	8.3638	4.20699	-16.442	116.227	91.557	90.9294
Temperate diallel	P16×P17	B73×LH132	3.034	248.737	37.9678	24.1188	4.75182	116.211	52.1292	32.9803	-0.882004	54.5402	-7.39488	-12.0522	-1.03467	51.7841	-9.17046	-14.6146	0.995813	17.3288	35.3971	29.0834	-0.152076	44.3317	24.9373	24.8031	-0.360013	15.5718	7.19934	2.53192	2.22198	35.4423	65.3941	65.3887	19.4349	553.181	71.6621	61.5074	-0.773662	25.7631	10.2861	6.35054	4.08387	116.837	144.866	136.342
Temperate diallel	P16×P18	B73×Mo17	6.85608	268.882	35.1551	34.1709	6.60414	125.727	58.4303	43.8697	0.25671	58.1382	-9.07467	-11.7338	-0.156207	55.3433	-8.62278	-8.74595	-0.168507	18.5397	30.2984	13.8467	0.442209	44.1354	37.6229	24.518	0.0860487	15.1163	19.4011	-0.467496	0.682133	40.4346	86.229	83.8246	15.7404	613.225	113.977	79.0381	-1.18749	24.2596	-3.94026	-13.4006	-0.755492	121.066	203.002	163.223
Temperate diallel	P16×P19	B73×PH4CV	7.57252	270.931	37.7799	35.1938	3.25727	117.056	54.1142	33.9478	0.392457	57.1381	-6.0251	-7.86303	0.270491	55.3705	-8.20617	-8.7011	0.967617	17.8079	36.891	28.6218	1.30028	48.065	31.7542	28.1166	0.32702	17.2244	13.8788	13.4132	2.47712	39.1181	70.9629	60.7562	52.4991	669.937	88.3549	81.6311	0.341582	26.5729	9.97078	2.87054	7.79413	143.532	151.019	109.946
Temperate diallel	P16×P20	B73×PH6WC	-7.31125	261.629	28.2985	26.1217	-4.64887	109.647	33.8689	25.4699	0.985729	58.2131	-6.37511	-6.61939	0.905093	56.4956	-7.18044	-7.51253	-1.05855	16.5244	19.6709	6.99629	-0.648255	45.4404	23.8342	19.7562	0.154814	16.7439	11.5754	10.2494	-0.889367	32.5328	45.7439	40.134	-12.8661	543.252	57.1183	55.656	-1.16085	28.4259	4.03405	-11.5876	-17.7621	112.453	101.329	71.1168
Temperate diallel	P16×P21	B73×Chang7-2	5.44197	261.996	39.4856	30.735	4.3858	133.154	52.2887	52.2084	-1.42303	55.7403	-10.4693	-10.8188	-1.72651	54.0374	-11.7909	-12.665	0.399274	16.5198	40.7912	35.7141	2.8318	50.4723	35.2856	28.8515	0.83085	17.9566	17.1899	16.1638	3.04712	39.9439	87.9341	86.4072	82.5127	713.927	112.053	108.439	0.257242	25.8842	10.3204	5.95382	10.7476	145.309	191.357	170.33
Temperate diallel	P16×P22	B73×Qi319	6.16224	274.65	39.411	37.0494	4.40148	129.878	51.7205	48.6198	-1.0311	57.3139	-7.39737	-7.57954	-1.07832	55.1129	-8.9417	-9.12585	0.0926487	18.8287	30.3918	12.6947	1.07616	48.282	30.5948	25.4185	-0.19097	15.6269	12.5247	2.89472	2.09094	38.9933	65.8502	52.3533	23.0779	606.966	82.2007	77.2105	0.924318	30.4689	11.9666	-4.57356	24.8898	168.344	206.494	163.623
Temperate diallel	P16×P23	B73×Si287	2.19883	250.307	35.9961	24.9022	4.05992	111.337	56.1533	27.4034	-0.759092	54.1434	-8.44613	-12.6921	-0.244123	52.6682	-8.79231	-13.1568	0.238944	16.8607	27.6257	18.324	-0.195464	45.7219	29.6071	28.9939	-0.0283161	15.7923	12.4792	3.98359	0.724893	34.6238	61.9115	61.5798	6.44419	546.305	75.1159	59.4999	0.96491	28.7363	13.1524	1.55461	-3.52818	114.285	124.359	104.508
Temperate diallel	P16×P24	B73×Tie7922	-11.3773	266.173	25.4616	18.8762	-4.54916	128.781	39.5657	32.5513	0.778012	58.2131	-4.18165	-6.12955	0.931342	56.6492	-5.44559	-6.59269	-0.1705	16.2205	24.1594	16.226	0.252125	46.7538	24.4352	17.766	0.785185	17.4779	17.1716	15.0823	-0.37506	35.6966	43.8408	26.5604	20.385	621.874	63.7237	49.0762	-1.31497	24.596	-1.3538	-10.1395	-10.9174	118.807	93.0645	54.1325
Temperate diallel	P16×P25	B73×Zheng22	4.73377	248.813	35.3175	24.1567	6.39519	106.109	56.4198	21.4204	-1.0524	54.2205	-8.36109	-12.5677	-0.386486	52.9972	-8.2876	-12.6144	0.0961475	18.0395	41.4768	35.3382	-0.334987	43.3411	27.6016	22.277	0.154073	15.1468	13.1477	-0.26667	-0.00274046	37.5777	90.6027	75.3648	8.40542	572.619	104.952	67.1825	0.481194	26.0473	0.566202	-11.118	1.71436	129.182	192.975	180.868
Temperate diallel	P16×P26	B73×Zheng58	-1.31445	235.915	32.5213	17.7207	2.33891	106.579	46.7227	21.9592	-0.739078	56.499	-5.42027	-8.89359	-0.720165	54.6878	-7.26425	-9.82679	0.814329	18.415	34.8852	21.6941	1.42754	46.8411	30.4632	28.8174	0.510514	15.8214	16.4901	4.1752	1.7015	37.1259	68.4268	63.8592	41.7017	586.986	89.7516	71.3772	0.762926	28.8116	7.93914	-6.72567	17.8395	143.712	169.959	137.637
Temperate diallel	P17×P18	LH132×Mo17	-0.891694	246.683	37.9454	24.9133	1.92767	111.343	62.8817	56.1031	-0.0936012	55.1318	-9.35512	-16.2982	0.134885	52.8219	-7.21711	-12.668	0.519623	19.47	31.0701	19.5593	0.361431	43.3059	34.8759	21.9153	0.291049	14.156	17.978	2.10028	2.60727	40.4327	86.2142	83.8159	48.8118	576.684	116.536	90.9622	-1.01732	28.3083	8.3814	1.05199	0.7929	120.75	189.73	144.255
Temperate diallel	P17×P19	LH132×PH4CV	-2.07615	246.832	39.8288	27.9724	2.85251	106.944	64.6445	63.5485	0.0771452	54.1667	-6.09525	-9.09889	0.213483	52.501	-7.38179	-12.4889	-0.0245933	17.0579	25.1052	23.2044	0.240925	46.2569	26.6655	23.2972	0.0225203	15.7546	8.92322	4.59069	-0.688651	34.0253	48.7006	39.8273	-12.4004	535.425	59.6297	45.1625	-0.0539536	30.0559	20.0889	16.3541	-3.50638	130.367	121.332	90.6893
Temperate diallel	P17×P20	LH132×PH6WC	10.2685	264.758	44.0423	27.6302	1.88717	106.476	50.1631	39.3227	-0.120182	54.4511	-7.80079	-12.6541	0.186385	52.9644	-7.45497	-13.2934	0.366883	18.192	26.034	17.7941	1.01487	46.3548	26.1949	22.166	0.0178143	15.4416	7.64035	4.15006	2.29317	33.7883	51.3636	45.542	35.814	522.319	60.4675	49.6581	1.16311	34.6284	22.8476	7.70384	36.0424	164.393	185.521	150.152
Temperate diallel	P17×P21	LH132×Chang7-2	3.25989	245.363	46.2988	40.0014	3.26253	122.323	60.0345	39.8274	-1.38954	53.1177	-10.1823	-15.0148	-1.06491	51.8865	-9.95913	-16.1413	0.257104	16.6198	34.4693	23.802	1.63693	48.5287	29.9432	23.8897	0.432451	16.3929	11.8099	6.048	1.17156	36.1413	70.0375	68.6505	28.2792	590.081	86.491	78.3603	0.951606	30.4571	25.1977	24.6724	11.175	143.871	178.852	167.655
Temperate diallel	P17×P22	LH132×Qi319	-4.77233	249.265	40.9142	28.7441	-1.50899	114.26	53.156	36.3197	-0.473113	55.2158	-6.05316	-10.6111	-1.26183	52.1169	-8.38965	-13.7169	-0.702921	18.2753	21.3008	9.3825	0.314884	46.772	26.3801	21.4961	0.0488007	14.7014	11.1528	6.03399	-2.82072	32.1546	36.7591	25.6334	-40.6208	473.654	51.3906	46.3027	0.693182	34.1163	21.51	6.84984	-13.9785	127.611	125.275	99.836
Temperate diallel	P17×P23	LH132×Si287	5.61485	239.272	45.9527	42.6732	1.50455	99.074	64.3018	51.5134	0.198296	52.4447	-6.38127	-6.78536	0.259769	50.3596	-6.9315	-8.17531	0.697774	17.5617	26.9179	23.2435	0.169558	45.3382	28.3806	27.6367	0.146984	14.8023	10.6387	6.76173	1.62503	33.5969	57.1042	56.7773	31.0289	501.277	71.8429	65.992	-0.537626	31.1123	18.4754	9.95144	0.83991	116.788	121.78	108.987
Temperate diallel	P17×P24	LH132×Tie7922	7.10153	270.202	40.7014	20.6753	1.70427	125.326	54.2051	28.9957	-0.9206	53.8584	-6.55221	-9.47088	-0.641066	52.2643	-7.12969	-11.6799	0.52013	17.1533	25.2957	22.9099	1.32535	47.0783	25.1718	18.5833	0.488885	16.0163	12.3537	9.35838	0.0465727	34.1912	37.7708	21.223	15.5096	547.386	52.2333	31.2198	0.90119	30.6907	18.9654	12.1273	2.20774	130.067	105.612	68.7407
Temperate diallel	P17×P25	LH132×Zheng22	0.41789	230.047	40.4802	37.4688	-3.34028	86.6654	52.4836	32.537	-0.698012	51.9188	-7.36841	-7.81594	-0.835694	49.7355	-8.15439	-9.4485	0.0590775	18.2446	36.3894	35.9052	0.612835	43.5402	28.044	22.5749	0.363374	14.1908	11.5147	2.35128	1.46919	37.1226	88.2876	73.2297	33.435	528.035	103.773	74.8528	-0.893642	28.551	6.6725	-2.5746	19.4843	145.087	216.686	193.485
Temperate diallel	P17×P26	LH132×Zheng58	-5.52433	217.255	37.5862	35.64	-2.38026	92.1525	49.5008	40.9284	-0.415289	54.1667	-4.32963	-5.73065	-0.785773	51.8097	-6.37345	-9.57505	0.00204911	17.8449	24.9787	17.9266	-1.24763	43.4172	20.7985	19.4014	-0.369686	13.7759	6.62049	-0.641192	1.01853	34.5159	56.5812	52.3397	3.50941	479.181	65.7589	58.6752	-1.08881	30.8384	11.9081	-0.164136	3.62098	127.628	132.239	111.042
Temperate diallel	P18×P19	Mo17×PH4CV	-10.335	254.896	30.5944	29.0721	-10.378	101.377	49.2536	42.1312	0.54026	57.0891	-8.98908	-13.3266	0.605547	55.5738	-7.7441	-8.11818	0.148786	19.6065	30.146	20.3975	-1.72521	43.5002	31.3983	15.9492	-0.639688	14.1908	12.6433	-5.79097	-0.244197	41.0019	76.999	68.4977	-27.7429	583.821	94.7687	58.2836	-0.212978	28.8072	7.00046	2.83291	-15.9048	127.037	148.401	85.8178
Temperate diallel	P18×P20	Mo17×PH6WC	1.31336	272.126	34.4078	31.1818	-0.346472	111.906	51.4799	46.4281	-0.540968	56.4896	-11.8772	-14.2367	-0.269051	55.1897	-9.20402	-9.65039	0.808062	21.0084	32.4252	29.0062	0.184452	44.7338	34.2577	17.894	-0.363294	14.1589	13.4564	-4.50146	2.03932	40.0666	77.2396	72.5856	19.3791	569.623	96.5351	63.212	2.31879	34.6944	15.3306	7.90912	16.1323	153.551	208.228	133.654
Temperate diallel	P18×P21	Mo17×Chang7-2	-3.25813	255.168	36.9142	29.2097	-2.17305	124.552	56.8581	42.3746	1.48007	58.4466	-8.93984	-11.2656	0.85315	56.4853	-7.67185	-8.70871	0.715983	19.4539	41.0756	19.4605	0.0813117	46.1825	36.1001	17.9	-0.0778571	14.981	17.0807	-3.08578	1.94881	43.4507	101.738	97.5364	28.5303	654.071	132.975	97.7022	-0.921118	27.4947	4.85496	-1.85231	8.23267	149.997	242.186	179.051
Temperate diallel	P18×P22	Mo17×Qi319	-6.46045	263.9	34.9538	33.6312	-5.64687	117.786	51.8407	40.5265	-0.129499	58.0187	-9.0881	-11.9152	0.279934	56.3394	-6.78936	-6.85239	-0.555742	20.7977	26.0753	24.4797	-0.730931	44.9356	33.7542	16.7258	0.178093	13.9291	22.6115	10.6556	-0.00926966	41.4982	74.3977	62.1403	3.28185	581.296	109.7	79.5512	-0.265342	32.0681	6.99567	0.435025	4.57552	155.233	217.531	143.092
Temperate diallel	P18×P23	Mo17×Si287	-5.27257	244.708	34.0166	23.9129	-0.0522278	105.181	66.2459	47.4645	-0.28779	54.4179	-10.8847	-17.382	-0.514667	52.2659	-9.36067	-13.5872	-0.779446	18.4597	20.9108	13.3554	-0.742057	43.636	36.781	24.2851	0.0385763	13.7923	19.7976	6.97427	-2.84246	35.6616	64.5786	62.1253	-37.068	496.919	94.078	76.5728	0.64225	31.2025	10.824	10.2702	-6.93015	118.086	162.997	111.31
Temperate diallel	P18×P24	Mo17×Tie7922	11.0186	290.441	37.8487	29.7146	2.88649	134.172	59.2723	38.1008	0.300414	57.5387	-8.20231	-12.644	0.448598	56.0347	-6.34347	-7.35616	0.0893091	19.0977	26.3042	17.2732	0.380732	45.3431	32.5915	14.2126	-0.562623	14.0632	13.5109	-3.97728	0.677826	41.3546	64.7544	46.6205	-12.8932	582.722	79.9054	39.6906	1.61717	30.317	9.47749	8.22243	3.27857	140.206	152.627	81.8943
Temperate diallel	P18×P25	Mo17×Zheng22	3.87897	249.83	36.9578	26.5069	7.46504	105.135	75.7977	47.3993	0.912802	55.9889	-8.35591	-14.9969	0.25447	53.5064	-7.27525	-11.5363	1.39756	21.9583	48.2968	34.8392	0.64892	42.7857	39.8648	31.7014	0.209766	13.1356	20.959	13.3728	1.69085	43.8764	119.391	99.4717	21.5017	579.841	159.478	151.386	2.59663	30.9516	7.99751	5.61703	1.90629	136.577	258.894	223.699
Temperate diallel	P18×P26	Mo17×Zheng58	6.50655	245.608	39.1066	24.3689	-0.914938	101.282	56.7621	41.9975	0.722225	57.7635	-6.32419	-12.3027	0.758491	56.0347	-4.84837	-7.35616	0.773439	20.9915	33.6315	28.9024	-0.61285	43.2614	32.9954	18.9729	0.0852065	13.3292	20.5766	11.2974	-0.882915	39.1466	75.335	72.7777	-15.8025	523.608	106.619	89.591	0.166466	31.004	5.27191	0.371976	-9.45738	123.618	161.923	104.41
Temperate diallel	P19×P20	PH4CV×PH6WC	9.4044	281.55	40.6622	35.725	4.15372	111.082	57.6275	45.3504	-0.331122	55.5636	-8.85849	-10.8695	-0.371453	54.6878	-9.66525	-10.472	0.365946	18.6984	27.6816	21.073	-0.580075	47.0408	24.6763	23.974	-0.567923	15.8214	5.86629	5.03416	0.742873	35.6587	49.9861	46.5397	-7.36678	562.83	56.8093	52.5925	0.964154	34.124	17.7037	6.13502	3.24752	154.583	130.577	126.11
Temperate diallel	P19×P21	PH4CV×Chang7-2	-4.12899	255.631	38.8779	32.5339	1.08158	122.483	61.1604	40.0093	0.658918	56.4896	-7.46305	-9.61997	0.648448	55.8811	-8.29181	-9.68521	0.521367	17.3914	38.3575	25.6132	0.661785	49.8345	29.9677	27.2233	0.839114	17.7651	16.4119	14.925	-0.0411073	38.3493	68.8879	57.5968	32.8037	678.297	93.8875	83.8976	-0.80795	28.3921	12.9784	9.91313	3.69849	159.38	161.024	133.126
Temperate diallel	P19×P22	PH4CV×Qi319	-7.98321	263.71	36.4635	36.205	-4.43373	113.675	53.2665	35.6222	-0.501452	56.5109	-6.86979	-8.51445	-0.514368	55.1456	-8.39274	-8.70266	-0.698158	18.7874	22.9828	12.4476	-0.636658	48.1014	26.5605	24.9494	0.0931739	15.7113	13.6405	4.3033	-0.718087	37.6779	50.9295	47.2138	-17.2776	580.689	67.6853	57.4346	-0.201074	32.9166	13.976	3.09247	-8.08296	156.491	136.706	128.902
Temperate diallel	P19×P23	PH4CV×Si287	-4.40193	246.912	36.9503	28.0136	-3.72749	96.182	60.6656	49.0755	-0.395643	53.1742	-8.20235	-10.7645	-0.261169	52.1199	-9.2278	-13.1241	0.489768	17.861	27.1483	25.3441	0.549917	47.9995	32.1823	27.942	0.581347	16.2022	15.9113	7.56219	-1.51474	33.8778	48.3451	39.2212	-6.48471	547.455	68.378	48.4242	0.0740184	31.4185	16.0901	11.0336	2.31867	141.251	127.368	106.61
Temperate diallel	P19×P24	PH4CV×Tie7922	0.478354	281.234	34.9535	25.6027	-1.54648	124.416	53.9088	28.0583	-0.725939	55.3765	-6.99395	-7.06863	-1.0967	54.0899	-9.22191	-9.8404	0.292593	17.4331	25.4126	24.9147	0.309906	48.3438	25.2151	21.771	0.475349	16.9683	14.2308	12.6481	0.948509	38.5138	46.6103	36.5486	35.5732	651.141	65.6855	56.0921	-0.486166	28.9979	9.00913	5.94272	2.07919	152.923	110.28	98.3929
Temperate diallel	P19×P25	PH4CV×Zheng22	0.524214	247.809	37.5861	28.4788	3.83858	96.1843	70.5377	49.079	-0.948451	52.9918	-8.56341	-11.0706	-0.760632	52.0918	-9.34139	-13.1709	0.997441	19.6903	44.918	42.2175	-0.162807	45.0455	28.695	20.0682	-0.270163	14.5228	8.99198	-3.58691	2.12873	41.2028	94.6471	69.3233	20.6228	598.915	104.717	62.3759	0.991302	30.1305	9.29341	2.81517	6.08551	154.673	179.802	126.242
Temperate diallel	P19×P26	PH4CV×Zheng58	-2.05381	238.381	36.7971	23.5908	-4.9218	91.951	50.2348	42.5177	-0.321558	55.5839	-5.02388	-6.72063	-0.871061	54.0057	-7.91035	-9.98083	-0.323377	18.0268	24.4197	19.1287	-0.798936	46.1468	24.9255	23.0038	-0.380222	14.7309	8.95918	-2.20539	-0.199032	36.719	56.281	50.8971	-16.4807	542.883	68.3298	47.1845	0.497634	32.1194	13.255	3.98296	-3.64876	143.343	122.511	109.67
Temperate diallel	P20×P21	PH6WC×Chang7-2	5.13195	270.473	41.3499	30.385	-5.30945	116.589	42.2634	33.2722	-1.39631	54.9161	-12.023	-12.1375	-1.00825	54.7149	-11.0025	-11.57	0.481543	18.0942	35.3419	17.1608	0.222148	48.7188	26.3536	24.375	0.385908	17.0036	12.2932	9.99871	0.0881099	35.2597	59.2018	51.88	13.086	597.259	75.7047	71.1306	0.222714	32.7782	15.8625	1.94921	-2.47517	147.683	147.231	124.725
Temperate diallel	P20×P22	PH6WC×Qi319	-5.68468	271.59	35.438	30.9236	-4.28277	114.323	42.6891	36.3956	0.11952	57.6136	-7.15712	-7.58106	0.114734	56.2652	-7.37232	-7.88971	-0.0651817	20.163	25.4246	20.6809	-0.0860955	47.9759	25.5243	24.6234	0.572358	15.8822	15.8688	7.1218	-0.75327	34.4239	41.0541	34.4999	10.1977	546.844	62.5681	56.6854	-0.90181	35.5713	11.0203	10.6365	-1.20932	157.842	143.63	140.184
Temperate diallel	P20×P23	PH6WC×Si287	-6.08019	250.815	33.7149	20.9086	-12.3689	88.0379	33.7614	15.197	0.339929	54.3915	-8.27887	-12.7497	0.0824332	52.954	-8.64314	-13.3104	-0.760086	17.3538	16.8862	12.3667	-0.214221	46.5593	27.466	22.705	-0.694359	14.6182	5.4727	-1.40359	-1.31332	30.8604	38.5241	32.9302	-34.1915	458.428	45.4329	31.3517	0.278582	34.9785	15.7311	8.79275	-11.9249	121.485	99.8105	84.86
Temperate diallel	P20×P24	PH6WC×Tie7922	2.13029	288.467	33.7512	28.8331	1.14439	127.604	47.0266	31.3399	1.47903	58.0632	-4.68356	-6.85985	1.2794	56.9565	-5.2782	-6.758	-0.550131	17.333	17.912	12.232	-0.161132	47.1967	21.571	18.8816	0.240143	16.4248	11.4604	10.7815	-1.21057	33.1359	28.8816	17.4815	-10.182	544.066	42.0241	30.4239	-0.724702	32.1148	7.90756	-0.114147	-9.73167	135.59	89.9037	75.9051
Temperate diallel	P20×P25	PH6WC×Zheng22	-1.83135	251.034	33.9614	21.0146	-1.40476	91.4383	46.6462	19.6464	-0.393179	54.0288	-8.93542	-13.3315	-0.42733	52.9156	-8.77384	-13.3733	-0.355483	19.08	32.6239	23.5439	0.154656	44.6869	26.8955	17.7704	-0.463469	14.0212	6.17094	-5.43022	1.11395	36.9692	79.3855	59.2436	4.44423	521.416	84.481	49.3996	0.592666	33.0873	7.67626	2.9106	12.2639	155.328	187.886	136.359
Temperate diallel	P20×P26	PH6WC×Zheng58	4.26913	250.285	37.8677	20.6534	4.26446	101.635	51.3382	32.9882	-0.249956	56.1372	-6.2811	-9.94937	-0.300709	55.0665	-6.96686	-9.85207	0.350099	19.4429	27.1771	25.8937	0.585986	46.8557	26.1147	23.4861	0.154672	14.9575	11.6127	0.884914	0.797985	34.4972	50.4041	48.5956	19.9999	518.043	65.7246	48.433	1.8482	36.8254	16.8307	14.5371	10.8652	152.334	141.432	131.803
Temperate diallel	P21×P22	Chang7-2×Qi319	6.80843	271.697	47.3129	40.3301	4.40199	137.481	60.5151	57.1534	0.78306	58.2131	-6.31386	-6.86247	0.863136	57.187	-6.46235	-7.57462	0.889939	19.6557	40.3863	17.6446	-0.588035	49.0258	26.2452	25.1587	-0.602506	15.244	8.7079	-1.3844	2.59542	41.2472	76.7456	61.1596	15.4192	627.363	91.6823	89.6293	-0.363714	32.1496	14.0888	0.690277	15.6951	179.092	204.552	180.455
Temperate diallel	P21×P23	Chang7-2×Si287	2.98872	247.497	44.3284	41.2191	4.28183	119.161	67.0184	36.2125	0.0933688	54.0809	-8.92758	-13.4737	-0.229266	52.8157	-9.49777	-14.6395	-0.260265	16.3912	28.336	15.0292	-0.137161	48.1882	29.7466	23.0204	-0.172592	15.6766	10.5892	1.41435	0.00357954	35.6519	68.0877	67.0622	-8.53219	559.384	82.7274	69.0818	0.242278	30.9824	17.5221	9.49237	3.90388	141.659	158.42	153.494
Temperate diallel	P21×P24	Chang7-2×Tie7922	1.8161	275.767	38.1718	23.161	3.43545	144.367	56.3794	48.5941	-0.180327	56.3398	-7.63604	-9.85964	-0.276701	55.5738	-8.18019	-10.1819	-0.0853101	16.3354	29.3862	17.0493	-0.147372	48.7623	23.65	22.8251	-0.232721	16.4886	9.54534	6.6671	0.190816	38.0119	54.2525	34.7691	-3.95277	625.592	67.2731	49.9674	0.926094	29.8058	15.0781	8.89435	14.6357	164.303	151.163	113.156
Temperate diallel	P21×P25	Chang7-2×Zheng22	-5.92554	234.554	36.925	33.8338	-4.3039	103.011	51.7509	17.7521	1.93176	56.2897	-5.25462	-9.93979	1.22277	54.7391	-6.2677	-11.5309	-0.613862	17.3592	40.9953	30.2344	-2.23438	43.8497	22.3864	11.9446	-0.199632	14.8217	9.61093	-4.11632	-3.53746	35.7924	83.1647	69.7924	-61.7518	530.517	93.9352	60.3563	-1.05924	27.4756	2.26295	-6.24422	-8.87128	138.539	188.788	157.735
Temperate diallel	P21×P26	Chang7-2×Zheng58	10.047	243.677	47.283	39.0392	-3.85878	107.984	48.5615	23.4358	-0.426516	55.8966	-6.80933	-10.5687	0.900292	56.4409	-5.27627	-8.78047	0.2059	17.8363	34.9863	17.8697	1.32805	49.1496	30.1402	25.4748	0.312712	15.6522	14.1072	1.25633	0.941875	38.1157	74.2938	68.2278	23.1877	596.528	96.5449	80.309	0.087094	31.1045	12.4554	0.697333	-5.38435	140.431	145.878	132.211
Temperate diallel	P22×P23	Qi319×Si287	2.93669	259.379	43.5735	33.9681	0.318852	111.906	60.9834	33.5114	-0.253102	54.9161	-6.94757	-11.0963	-0.740782	52.7315	-8.48832	-12.6994	-0.22769	19.0393	23.0036	13.9552	-0.0461043	47.8446	30.0014	24.2823	-0.0633721	14.478	13.6381	12.2926	0.0886899	35.7426	52.3084	39.6523	-1.91149	518.478	71.3486	60.148	-1.12285	33.5349	11.3643	5.02894	3.32853	149.977	150.504	134.861
Temperate diallel	P22×P24	Qi319×Tie7922	-1.10723	284.778	36.4138	27.1853	0.28593	137.926	52.4268	41.9639	0.510202	58.212	-3.99066	-5.76054	0.448783	56.7266	-5.12217	-6.08521	-0.944835	18.0914	17.9988	8.28181	0.0937849	48.5688	24.2212	22.3377	-0.638571	14.7749	8.50533	0.88217	-1.37766	36.449	35.5002	29.2279	-41.7415	540.277	45.8431	29.5156	1.85917	34.6565	16.8843	8.54171	8.13615	166.697	136.551	116.261
Temperate diallel	P22×P25	Qi319×Zheng22	6.84723	259.261	43.6519	33.907	0.757182	104.781	58.6385	25.0103	1.34919	56.8888	-3.65269	-7.90267	0.920255	54.8639	-4.85531	-9.16904	0.650413	21.239	41.4194	27.121	-0.900927	44.7485	26.0812	16.2398	0.0463175	13.7598	13.8397	9.3106	-0.658743	38.6767	77.4319	51.1163	-8.54646	536.196	98.5835	65.6207	0.740038	33.1925	8.41075	3.95657	-15.2079	141.096	166.092	120.952
Temperate diallel	P22×P26	Qi319×Zheng58	-0.627086	244.937	40.264	26.5087	1.9463	110.497	55.9496	31.8301	0.509113	58.0139	-2.68557	-6.08124	0.866876	56.8348	-3.42266	-5.90608	0.345295	20.5912	29.3421	23.2438	-1.0353	46.3516	23.8369	20.4041	-0.133142	13.8985	13.1615	10.4125	0.884796	38.0642	57.7751	48.7231	6.49087	532.304	77.4564	64.4186	-2.11753	32.8175	4.48388	2.78209	-6.1365	148.572	138.99	132.66
Temperate diallel	P23×P24	Si287×Tie7922	5.15126	270.657	38.226	20.8785	1.86517	121.305	59.2293	24.8572	-0.317388	53.9419	-6.80004	-9.33053	-0.267418	52.7315	-7.50417	-10.8904	-0.257639	16.6643	18.1631	16.9457	1.38196	48.5685	29.8446	22.3369	0.306483	15.7227	14.1856	7.35349	0.597386	35.4206	42.9815	25.5818	17.6779	555.669	59.0861	33.2054	0.287062	31.3112	12.4932	10.6544	4.43418	137.353	106.602	78.1927
Temperate diallel	P23×P25	Si287×Zheng22	2.57012	234.604	40.0407	39.8896	-1.11608	84.7079	63.6985	53.4274	0.6026	52.6997	-6.3808	-6.42942	0.135854	50.8006	-7.44031	-7.50932	0.136609	18.6109	34.9653	30.6065	-0.0237531	44.3372	31.1819	26.2823	0.443901	14.1601	15.6904	9.82696	-0.186794	36.1452	83.7459	69.3737	12.5351	513.25	106.251	82.376	-0.56517	30.1141	4.5594	2.75921	6.7614	137.423	180.24	145.913
Temperate diallel	P23×P26	Si287×Zheng58	10.4475	235.632	45.7462	40.5023	6.58864	96.9397	71.4213	67.453	-1.01948	53.0428	-6.71481	-7.68663	-0.725725	51.9633	-7.32341	-9.30696	0.68479	18.8164	28.082	24.3468	0.725277	46.8237	31.0267	28.7696	-0.0350583	13.9993	12.583	8.57978	0.999345	35.1753	59.8961	55.25	12.9671	494.753	77.4576	75.8034	1.78526	34.9471	18.0935	13.1373	7.73313	136.8	135.136	126.207
Temperate diallel	P24×P25	Tie7922×Zheng22	3.966	265.442	35.6885	18.5498	1.12444	113.001	55.3945	16.3095	-0.784196	53.8455	-7.01359	-9.49256	-0.672882	52.7974	-7.45506	-10.779	-0.204736	18.0388	32.2241	29.2548	0.455236	45.4005	25.7849	14.3572	0.141402	14.7297	12.3037	0.573547	0.139653	38.6444	67.2653	37.0116	7.48263	569.826	79.9196	36.5992	0.599165	29.418	3.80974	0.383955	11.6755	154.249	158.647	100.112
Temperate diallel	P24×P26	Tie7922×Zheng58	0.927478	255.554	34.6628	14.1336	-0.903241	115.5	48.9885	18.8821	1.16863	57.7635	-1.21879	-2.9069	0.69374	56.1883	-3.51604	-5.04884	-0.684654	17.2162	18.3724	13.772	-0.870833	45.8119	20.4578	15.3935	-0.332657	14.5738	9.4873	-0.490929	-0.253408	36.0953	41.9331	27.9739	-15.6845	527.73	52.2306	26.5079	-1.77882	29.5226	1.34706	-4.42389	-12.6493	128.329	86.5836	66.4857
Temperate diallel	P25×P26	Zheng22×Zheng58	0.941338	222.097	37.5282	32.7181	2.72661	85.5139	61.0842	47.7161	-1.18699	53.2457	-6.40612	-7.33351	-0.620288	52.5401	-6.36307	-8.30026	-0.0431065	19.4101	36.396	28.2702	0.828054	44.6852	29.8058	22.8885	-0.229669	12.9768	10.1484	8.3549	0.911512	38.769	90.7018	71.1112	4.42357	510.562	107.357	84.8674	0.0589452	31.0155	3.05077	0.409206	-1.14613	137.575	168	127.489
NCD II	P29×P16	TR0397×B73	3.34909	305.562	43.5987	35.6998	5.69838	165.098	51.6811	26.7044	1.1384	64.2484	-4.08382	-10.7084	1.39338	62.3001	-7.46674	-15.8186	-0.450232	18.0446	36.0204	25.6614	0.0656877	47.3973	43.3432	33.7207	-0.217037	13.7313	4.90277	-9.58696	-1.77685	35.6746	69.7529	66.4836	-34.8466	497.239	70.4402	45.1745	-0.858619	34.7439	48.0527	42.1675	2.6185	146.983	255.26	219.572
NCD II	P29×P17	TR0397×LH132	-1.55006	280.257	45.4577	24.4619	-1.19023	142.218	45.3488	9.14468	-1.36291	59.4192	-6.96132	-17.42	-1.15866	57.505	-9.71415	-22.2979	0.268643	18.0586	29.9919	25.7589	-1.13734	44.3549	33.9875	24.8685	0.124213	13.4589	8.29237	-2.92756	-0.583608	32.1588	53.0184	50.0665	2.91448	438.642	61.5761	45.2511	-0.937917	36.5222	50.1013	49.4441	-5.67082	126.791	194.217	156.476
NCD II	P29×P18	TR0397×Mo17	0.620329	295.018	39.6013	31.0175	-1.86505	148.57	47.3696	14.0194	-0.246681	64.294	-6.69886	-10.6451	-0.196575	61.7064	-8.23713	-16.6209	1.39815	21.1605	38.1031	29.9402	-0.473027	43.2659	45.7235	40.9946	-0.133999	11.7921	11.6428	7.28088	1.08781	39.575	85.8016	79.9166	-1.20625	475.724	101.74	97.4246	0.757143	37.668	43.6276	34.4633	6.84655	140.73	298.27	282.906
NCD II	P29×P19	TR0397×PH4CV	-3.49876	286.574	37.0991	27.2674	-8.69736	135.316	38.9136	3.84835	-1.65258	59.8392	-9.01894	-16.8363	-1.20326	59.4666	-11.2442	-19.6473	0.114561	17.9497	27.2807	25.0005	0.437082	48.0967	41.0403	28.2011	-0.189168	14.0037	7.49379	-7.03308	-0.209123	35.2965	57.0943	45.0513	-6.02127	500.352	64.1009	35.6537	1.16265	38.2077	52.0096	47.9118	2.27667	146.054	177.883	113.635
NCD II	P29×P20	TR0397×PH6WC	-0.116107	300.386	38.8697	33.4015	-0.526262	150.228	45.3403	15.2922	0.15583	62.9886	-6.19235	-12.4593	-0.533075	60.9924	-9.70216	-17.5856	-0.775411	17.9603	20.5244	16.2938	1.14202	48.3209	40.8151	27.3476	0.46836	14.0945	9.18309	-4.93582	0.107354	33.6709	53.6838	45.0363	21.499	479.185	62.4431	37.2992	0.526578	41.5574	46.8714	29.2549	0.841207	143.986	181.03	119.1
NCD II	P29×P21	TR0397×Chang7-2	-2.08595	290.758	45.2218	29.1254	0.9166	165.232	51.74	26.8073	0.90952	64.9184	-3.43533	-9.77729	0.939232	63.7667	-6.14311	-13.8369	-0.180929	17.6179	37.3485	22.6899	-0.0633599	47.3537	35.573	20.89	-0.0722475	13.6571	3.26808	-11.6503	0.612916	37.642	80.6108	78.5665	0.697305	518.215	81.257	56.6379	-1.18058	35.0635	43.5017	43.4753	5.6742	148.029	227.116	175.39
NCD II	P29×P22	TR0397×Qi319	0.177184	292.689	39.7792	29.983	-2.06715	151.434	41.4478	16.2175	0.177701	63.9822	-4.30694	-11.0784	0.242101	62.4444	-7.08315	-15.6237	-1.32855	17.59	13.2377	5.2808	0.226338	47.212	36.4846	22.6391	-0.20295	12.334	4.61585	-2.01624	-3.14243	31.802	37.6802	24.2557	-47.068	399.789	41.5898	23.4872	1.37755	40.9226	45.1982	28.1667	-1.94995	140.417	179.128	119.889
NCD II	P29×P23	TR0397×Si287	0.0094644	283.161	44.1456	25.7515	-5.79837	134.953	45.4924	3.56955	-0.693705	60.1376	-6.19315	-16.4216	-0.608216	58.8014	-8.72905	-20.5462	0.161629	17.9695	25.62	25.1384	-0.27754	46.1885	40.3995	31.5552	-0.198535	12.6463	5.89368	-1.9142	1.09003	34.6551	65.247	62.3912	11.0789	446.341	70.8843	58.6006	1.08142	40.2252	52.5557	42.1566	-3.86116	136.412	194.512	144.104
NCD II	P29×P24	TR0397×Tie7922	-4.41568	309.385	37.7852	37.3976	8.70606	181.818	59.8698	39.5357	0.48129	63.3908	-3.54882	-11.9003	0.523115	62.1408	-6.68359	-16.0339	-0.391827	17.8136	25.8212	24.0525	0.0122159	46.9292	33.3467	18.2079	0.538767	14.0827	9.86017	-3.84413	-1.18161	35.1215	43.9167	24.5214	-1.40281	496.928	51.015	19.1239	-1.18759	36.3269	40.2312	32.7189	-5.16017	139.035	144.277	80.3751
NCD II	P29×P25	TR0397×Zheng22	4.12874	287.252	46.3633	27.5686	3.42025	142.012	59.0424	8.98705	-0.386999	60.889	-5.06438	-15.3773	-0.486907	59.4666	-7.75517	-19.6473	0.201941	19.4812	40.7149	35.6658	0.194304	44.5895	41.1661	37.2538	-0.26187	11.6428	3.13402	0.488512	1.86395	38.7745	100.878	88.1992	14.9557	471.559	106.265	95.6961	-0.589556	36.8717	37.2118	25.8184	1.53704	141.916	259.529	236.354
NCD II	P29×P26	TR0397×Zheng58	5.8816	283.021	48.6402	25.6894	6.95618	148.361	57.6692	13.8593	0.123759	62.4911	-3.42377	-13.1507	0.0388716	61.2346	-6.72766	-17.2584	1.0589	20.2169	37.1014	33.6019	-0.20197	46.041	37.3362	26.6171	0.253355	12.4591	8.49094	4.03216	0.880699	36.2	67.3598	59.7726	15.1715	456.75	76.6438	65.3827	0.00922133	40.9989	48.2036	32.7293	2.65429	146.591	201.539	142.398
NCD II	P29×P27	TR0397×Dan598	4.33988	299.066	48.2504	32.815	1.22046	158.238	56.9857	21.4397	1.08141	65.7182	-1.35054	-8.66574	0.585997	63.6079	-4.86646	-14.0515	0.250235	17.5282	31.0779	22.0652	0.200125	51.735	40.9216	21.0527	-0.738744	14.0945	1.71614	-15.7108	1.09089	34.9563	81.7356	69.6669	0.814569	498.795	85.5366	68.1066	0.610718	39.2192	50.4585	41.6152	2.93475	145.79	248.051	210.047
NCD II	P29×P28	TR0397×Huang C	-8.19678	268.118	40.518	19.0713	-7.93246	138.731	47.6355	6.46867	0.00552358	65.2981	-5.69187	-9.24958	0.27874	64.3975	-6.88304	-12.9846	-0.38989	18.3679	27.0414	26.1818	-0.263047	45.0319	38.8634	31.7815	0.611241	13.6882	10.6788	-0.400198	-0.122908	30.1461	54.269	46.3197	18.4558	415.869	64.2843	56.7456	-0.520433	41.0014	61.0099	54.7713	-8.81534	116.553	217.342	217.125
NCD II	P30×P16	CL04934A×B73	0.141966	299.53	42.8531	36.802	1.30182	150.557	52.1393	36.2135	-0.584479	61.9388	-9.83809	-17.8316	-0.211476	59.4666	-12.6211	-21.1993	0.0701889	17.6055	48.9379	44.6334	-0.866894	48.1266	45.8999	35.7782	0.220178	16.7279	20.6876	10.144	-0.216731	37.3757	89.2354	74.4221	6.2835	622.138	114.25	81.64	0.598396	30.8956	39.6623	37.3394	-2.28805	142.156	254.088	209.077
NCD II	P30×P17	CL04934A×LH132	-3.11548	275.867	45.5295	25.9946	-7.4354	125.827	43.051	13.8401	0.903606	61.099	-6.83067	-18.9457	-0.148009	57.287	-11.074	-24.0876	0.156864	16.9873	36.4804	26.5395	0.0847771	47.2389	43.0433	32.9875	-0.165072	15.729	19.1659	13.4456	-0.913589	31.9698	61.8593	49.1845	-23.2684	496.227	83.7078	64.3199	0.814599	32.9694	43.4319	36.0983	1.01974	133.561	219.004	170.171
NCD II	P30×P18	CL04934A×Mo17	-0.680694	290.893	39.7062	32.8572	-10.9292	129.36	42.2663	17.0363	0.0845378	64.0385	-9.32422	-15.0461	-1.20773	59.4666	-12.5161	-21.1993	0.674873	19.4777	40.3611	19.6066	-1.38261	44.0182	48.6556	44.1938	-0.935785	13.5497	19.5565	8.10615	0.675625	39.3038	96.1767	78.6837	-16.3798	544.319	132.166	128.468	2.09246	33.698	35.4391	20.2916	3.2944	137.257	302.408	300.161
NCD II	P30×P19	CL04934A×PH4CV	-7.74099	279.507	35.7389	27.6573	-4.4264	129.442	47.8926	17.1106	-0.645965	60.2591	-10.7067	-20.0599	-0.410509	59.0307	-12.8429	-21.777	-0.313318	16.5623	30.8543	19.6249	0.738101	50.0596	47.1396	33.4332	-0.115154	16.6371	20.5727	10.4494	-1.333	34.3136	61.8287	41.0121	-28.3132	561.828	85.0884	52.321	3.38127	35.121	47.6327	35.9624	5.72152	149.579	191.387	118.79
NCD II	P30×P20	CL04934A×PH6WC	-11.4595	286.218	34.2511	30.7224	4.18948	144.798	54.9031	31.0039	-0.681901	61.5642	-10.5951	-18.3286	0.472672	60.7695	-10.9925	-19.4728	0.978409	18.7546	39.3731	21.4369	-2.27936	46.5614	36.0029	22.7105	-1.31393	14.8716	8.71053	0.305538	1.64987	35.3544	71.2534	52.2879	-12.3269	529.128	80.2038	51.6091	-1.34501	34.3805	27.5738	6.9328	-5.96514	137.259	174.47	108.864
NCD II	P30×P21	CL04934A×Chang7-2	0.922427	290.941	47.6077	32.8795	-1.82326	152.347	53.8772	37.8337	0.401039	63.8232	-7.42385	-15.3317	-0.523021	61.0758	-11.0579	-19.067	0.0110919	16.8504	48.0475	46.9225	0.420859	49.4998	42.0408	26.3688	0.555667	16.8444	20.3528	8.96882	0.730435	37.9005	93.5991	79.7928	36.7429	638.029	124.23	92.8534	-0.0735633	30.8652	33.6816	26.3429	0.233756	142.668	224.051	165.417
NCD II	P30×P22	CL04934A×Qi319	-0.614639	289.072	40.1346	32.0259	0.340888	143.696	47.8759	30.0069	-1.27898	61.9388	-9.67768	-17.8316	-1.28906	59.6846	-12.1425	-20.9105	0.0785695	18.0376	28.0325	7.9598	1.06796	49.7155	44.0532	29.1422	-0.547735	14.5486	15.8259	15.577	-0.318154	34.7673	59.2363	35.8414	-21.7917	508.834	81.0809	57.1691	0.56746	34.8072	29.692	9.01369	2.3596	144.806	195.045	126.762
NCD II	P30×P23	CL04934A×Si287	10.1702	290.497	50.2603	32.6764	9.51617	140.123	69.0868	26.7734	0.861614	61.1062	-7.16349	-18.9361	1.21133	59.3923	-8.84306	-21.2978	-0.86325	15.9851	24.3082	12.1793	1.26778	49.3957	50.5124	40.69	0.22978	15.634	22.9726	21.2587	-1.29196	32.4141	64.4801	51.8901	-11.7943	507.236	95.2142	80.2389	0.371737	34.2102	36.7208	20.8995	-4.69701	135.656	200.845	142.751
NCD II	P30×P24	CL04934A×Tie7922	0.811296	311.787	40.8064	39.2479	2.653	165.619	59.4908	49.8414	-0.0644907	62.2583	-7.67877	-17.4077	0.712362	61.1014	-9.23778	-19.033	-0.332576	16.9133	33.0452	21.1902	-0.895806	47.6831	35.7957	20.1067	-0.170618	15.9327	17.241	8.78756	-0.41559	36.0285	55.7023	27.7371	-8.07725	574.022	75.1672	37.605	-1.86628	30.3429	23.549	10.8566	-7.96582	136.309	144.76	76.8384
NCD II	P30×P25	CL04934A×Zheng22	0.0293193	280.328	45.1365	28.0322	-0.236915	128.21	61.4611	15.9957	0.19972	60.889	-7.53456	-19.2243	0.52384	59.2487	-9.12058	-21.4881	0.0444621	18.3642	48.1097	37.7742	-0.362078	45.695	45.0313	40.6567	0.720154	15.1842	25.9061	21.1471	-0.394028	36.6575	103.226	102.825	19.2776	559.649	146.261	134.903	-2.70114	29.4548	15.3891	0.509461	-2.50621	137.952	260.693	226.96
NCD II	P30×P26	CL04934A×Zheng58	6.08337	280.398	49.7093	28.0641	2.64651	133.906	59.0139	21.1492	0.202879	61.9835	-6.67932	-17.7723	1.07402	61.0411	-8.04321	-19.1129	0.229524	18.428	38.5507	21.78	-1.23105	46.6738	39.5549	28.3573	-0.51883	14.2463	16.2494	13.664	0.117917	35.5782	74.6997	57.0282	-12.1184	513.229	99.5351	85.8329	-0.668163	35.0162	33.0489	13.361	-5.89915	138.117	191.46	128.386
NCD II	P30×P27	CL04934A×Dan598	-1.57984	290.322	46.1704	32.5964	1.0961	147.969	62.7606	33.8721	0.198331	64.2484	-5.97515	-14.7677	-0.800856	60.9924	-9.76187	-19.1775	-0.398944	15.9195	33.475	28.5386	1.49324	54.69	49.2943	27.9669	1.15137	18.544	26.7736	10.8985	-2.5281	31.4783	75.1714	74.1683	-19.1429	562.606	110.336	89.6125	0.741733	34.0449	37.7174	22.9315	-1.95569	140.979	246.716	199.815
NCD II	P30×P28	CL04934A×Huang C	5.6755	279.166	48.7336	27.5014	1.94828	138.466	64.6793	25.275	0.134643	64.8405	-8.61421	-13.9822	0.411187	63.3013	-9.42264	-16.1179	-0.398669	17.3996	33.7114	19.5298	1.80657	48.7634	50.7399	42.7013	0.871355	16.5077	25.6442	20.1154	3.95441	34.3644	88.0245	85.9586	85.9511	567.133	125.249	113.759	-1.66292	34.5536	43.2597	30.4323	18.5738	144.022	305.676	292.399
NCD II	P31×P16	CML418×B73	6.61878	289.24	50.4825	44.3295	4.53449	141.367	62.9105	61.7669	0.00596301	58.4951	-6.05053	-6.42326	-0.334877	55.0382	-11.0441	-12.7696	-0.244157	16.8723	41.5248	38.61	0.686339	49.4215	39.6121	39.4315	0.290636	16.393	17.3762	7.93887	-1.34117	35.4777	70.6052	65.5647	-11.3969	580.584	91.0481	69.5081	0.891611	29.4438	29.3991	27.9459	-5.78303	135.704	207.759	195.048
NCD II	P31×P17	CML418×LH132	3.20733	265.423	54.233	44.2405	10.6888	131.529	73.5765	52.6527	-0.408452	55.7528	-5.73293	-10.8102	-0.79281	52.3372	-10.1295	-17.0504	-0.870382	15.5412	23.856	15.7674	-1.39949	45.4963	28.3853	28.0817	-0.530815	14.9579	12.4236	7.88399	-0.207123	31.9027	53.4086	48.8714	-18.3566	477.266	68.2689	58.0412	0.425514	30.8353	30.5546	27.2887	-2.23124	127.353	177.97	157.612
NCD II	P31×P18	CML418×Mo17	-2.81198	271.994	42.593	37.7301	1.71945	129.587	64.5662	50.398	-1.03292	58.8869	-8.25957	-10.5971	-0.775029	55.5943	-10.0264	-11.8882	-0.144674	18.2393	30.4862	12.002	0.836424	45.9789	43.5766	30.0555	0.120173	14.2003	24.1393	11.4177	0.813391	38.668	83.4415	75.7932	15.4785	552.304	122.733	108.199	-0.514027	29.3465	15.025	4.75805	8.02533	139.031	265.332	229.499
NCD II	P31×P19	CML418×PH4CV	0.498728	270.98	43.7967	40.492	2.48297	123.93	64.492	43.8322	-0.726423	56.1445	-8.03439	-10.1836	-0.73351	54.4027	-11.6041	-13.7768	-0.133564	16.3232	27.9433	17.8979	0.833734	49.8969	36.9479	32.9995	-0.598796	15.7481	13.2623	4.54754	0.544462	35.4175	59.1944	45.5486	-9.21524	557.053	75.6927	51.0264	2.20458	32.1993	31.8452	24.6518	2.09925	142.999	158.679	109.166
NCD II	P31×P20	CML418×PH6WC	7.65239	288.563	47.431	39.1059	0.969744	129.157	58.8777	49.8989	0.283191	58.4951	-6.29532	-6.42326	0.317471	56.3093	-9.31005	-10.755	0.816263	18.1736	34.0483	17.6749	0.0630726	48.6455	32.7346	28.2031	0.064632	15.8448	14.9365	6.86955	0.635539	33.5665	54.7642	44.5866	13.5967	531.178	72.9419	52.1967	-0.309791	33.6707	22.0745	4.72513	7.13128	147.398	173.183	124.292
NCD II	P31×P21	CML418×Chang7-2	-12.7546	260.497	45.0142	41.564	-3.39649	138.352	59.3513	58.1499	-1.91152	57.4765	-8.04687	-8.05275	-1.30232	55.9915	-10.3913	-11.2587	-0.390854	16.0296	39.596	37.3444	0.291592	49.1122	31.802	25.3793	-0.812415	15.071	6.87449	-2.50382	0.465701	36.8622	78.7596	74.8673	-20.8166	556.597	86.7418	68.2393	-0.189648	29.0041	22.2708	18.7247	-4.54462	134.932	181.264	151.025
NCD II	P31×P22	CML418×Qi319	0.585576	273.506	44.855	41.2642	-1.10414	129.829	52.7585	50.6796	0.659763	59.8434	-3.69631	-4.26634	-0.202153	56.4665	-8.55435	-10.5059	-0.382177	17.158	20.9213	2.69516	0.675989	49.0652	32.878	27.453	0.670423	15.3614	21.2763	20.5279	-0.570848	33.741	47.482	31.8317	10.9839	517.737	75.7939	59.9189	-0.337824	32.1569	17.0578	0.71314	2.41692	141.906	167.614	122.221
NCD II	P31×P23	CML418×Si287	-8.89044	254.669	44.8133	38.3966	-5.81507	112.369	58.9685	30.4154	-0.703644	55.5068	-6.53265	-11.2038	-1.01917	52.8568	-10.3654	-16.2269	-0.880797	15.5487	19.9713	9.11675	-0.962218	46.9074	33.1406	32.6817	-0.398963	14.5999	13.8918	13.2381	-0.892189	32.0403	54.4014	50.1385	-24.5971	470.56	72.1452	67.2067	-0.154848	31.9386	24.4949	12.8716	-7.16058	130.235	165.576	133.05
NCD II	P31×P24	CML418×Tie7922	-5.26549	288.943	41.666	29.0456	0.512666	151.057	64.8035	55.48	0.699752	58.9884	-3.30024	-5.63411	0.210261	56.2943	-7.91895	-10.7788	-0.117823	16.7092	30.4026	19.7277	-0.398473	47.9221	27.7005	20.7088	0.15184	15.8498	15.7308	8.22153	0.306676	35.9772	48.7666	27.5552	10.4623	568.688	66.6659	36.3265	-0.528762	29.9354	18.829	9.36784	3.80571	145.123	143.341	88.2731
NCD II	P31×P25	CML418×Zheng22	-0.643765	262.888	49.6409	42.8631	-6.19325	109.832	63.3854	27.4702	0.913662	57.5688	-3.10819	-7.9051	1.01604	55.4359	-6.05701	-12.1393	0.356516	18.2574	46.0574	36.973	-1.29344	44.5053	31.2063	25.8873	-0.226398	13.8323	13.6996	8.53034	0.494239	36.7722	92.7052	82.3828	-1.20032	515.298	114.017	94.249	-0.825025	29.5859	13.0998	0.956817	-4.37109	133.13	215.523	215.515
NCD II	P31×P26	CML418×Zheng58	-0.01261	257.535	51.6461	39.9541	-6.20042	112.637	56.3827	30.7263	2.13912	59.8856	-0.165542	-4.19883	3.05222	58.7143	-2.46065	-6.94332	0.531378	18.311	36.6324	21.0069	-0.190319	47.4562	32.3454	30.509	0.821328	15.1811	22.818	19.1132	1.23468	35.9214	67.7814	58.543	45.2538	546.728	101.948	97.9625	-3.90405	30.0353	11.4445	-2.76408	-6.23873	134.82	162.628	122.934
NCD II	P31×P27	CML418×Dan598	5.55307	280.687	54.9477	52.536	-4.53754	129.913	65.0147	50.7767	0.029773	60.0457	-2.98984	-3.94271	0.350643	57.8389	-5.80873	-8.33074	-0.32849	15.5711	29.4566	25.7255	1.26368	54.2021	38.818	26.8253	1.04123	18.0285	22.3652	7.81564	-0.53473	32.6981	71.9658	62.1761	22.5797	580.456	106.571	95.6283	-1.68085	29.8773	17.8431	7.88288	1.34853	141.325	216.815	200.553
NCD II	P31×P28	CML418×Huang C	4.90592	261.629	53.6948	42.1792	5.17985	129.276	79.8027	50.0371	-0.217715	60.454	-6.29829	-9.12548	0.0279858	58.6131	-7.98824	-8.85609	1.72598	19.1054	45.6882	31.2482	-0.545396	46.1531	32.767	30.5482	-0.611487	14.6195	10.3846	6.37624	-1.23152	28.4049	47.0168	40.8826	-37.7298	419.579	58.155	58.1439	5.1737	39.6452	60.1687	49.652	5.42804	127.919	224.266	203.165
NCD II	P32×P16	CML84×B73	7.12074	291.321	55.128	45.3681	-1.84257	129.155	70.887	47.792	0.390654	61.5189	-1.76922	-2.72078	0.289516	58.8127	-4.78755	-6.48685	0.684791	17.4299	38.7692	34.6125	0.400744	49.7276	36.8491	33.5683	-0.437175	16.0923	13.9661	5.95893	0.785527	35.4477	73.7062	65.4247	-1.3466	568.598	86.6427	66.0087	-0.121481	30.4472	22.4798	11.8474	-1.5034	139.255	222.003	202.768
NCD II	P32×P17	CML84×LH132	-1.24611	262.548	56.5792	49.8688	6.03232	121.037	87.4253	85.1021	-0.171451	58.6289	-1.47736	-7.2907	0.476682	56.7568	-2.37047	-9.75577	-0.377134	15.6631	18.7827	16.6755	-0.621274	46.8662	28.8393	25.8826	-0.252225	15.6636	16.3801	12.9739	-0.0183307	29.9348	46.686	39.6884	-5.12886	468.458	64.7272	55.1244	-2.10618	30.3201	17.8697	11.3805	-8.68491	120.17	167.239	143.083
NCD II	P32×P18	CML84×Mo17	-3.27892	273.107	46.568	38.2934	-2.2332	119.799	77.3547	67.9583	-0.152119	62.4068	-3.32501	-5.25317	0.0541731	59.5736	-3.4279	-5.27699	-0.604125	17.4085	19.1017	6.9003	-2.00007	43.7341	32.679	17.4697	-0.433838	14.0734	21.3951	7.81571	-1.83822	33.8597	63.647	53.9336	-29.3226	485.467	95.1876	81.9732	-1.03742	30.8396	11.6655	10.088	-16.3617	113.915	206.155	181.278
NCD II	P32×P19	CML84×PH4CV	8.57778	280.638	52.494	45.4995	0.907615	116.519	81.6525	80.5959	0.561578	60.0716	-2.1859	-5.00937	0.508982	58.7953	-4.30915	-6.51452	0.451584	16.537	23.4408	19.4421	-0.374661	49.2802	31.8592	31.3557	0.300693	17.0747	21.4577	13.3545	-0.180846	32.5355	48.8395	33.705	5.88859	550.121	73.0962	49.147	0.388988	32.4002	22.1416	19.0217	-0.777524	139.393	156.084	103.892
NCD II	P32×P20	CML84×PH6WC	1.36034	283.851	48.3694	36.8341	-3.84911	118.502	69.0569	55.0595	1.30609	62.1571	-1.00725	-1.71159	0.646463	59.7884	-3.54924	-4.93547	-1.43199	15.554	9.56569	0.712903	0.112077	49.2862	31.1253	29.8916	0.650221	16.8575	20.9312	13.7	-3.92557	26.8487	26.0485	15.6499	-58.0554	437.49	42.0913	25.3525	1.50622	37.5032	26.3295	16.6453	-6.83909	132.699	149.866	101.924
NCD II	P32×P21	CML84×Chang7-2	-10.6919	264.139	50.7459	50.7148	-6.83915	129.074	70.6761	47.544	-1.49902	60.5281	-3.72637	-4.28751	-0.484229	59.9597	-3.88466	-4.6631	0.500794	16.5499	36.5346	27.8162	-0.587904	48.8244	27.8109	24.6446	-0.437486	15.873	11.3457	2.68469	1.21799	35.4578	75.2508	68.2051	6.81147	562.189	88.1438	69.9295	0.77766	31.9879	23.8598	17.5071	-5.14639	133.602	183.501	148.55
NCD II	P32×P22	CML84×Qi319	3.15633	277.656	50.5732	43.4077	1.078	126.176	70.9865	50.5367	0.801463	62.6242	0.190865	-0.972968	-0.134071	59.6847	-3.18364	-5.10037	0.131072	17.2999	16.6709	3.54447	-0.291806	48.6891	28.5915	26.476	0.0457119	15.1638	18.2778	16.1692	-0.0946554	32.0605	42.5573	25.2657	6.43393	491.151	66.3426	51.707	1.40508	35.9163	21.4388	12.4873	1.16475	139.925	168.166	119.119
NCD II	P32×P23	CML84×Si287	-15.5817	249.557	45.5602	42.4531	-3.75572	108.593	82.5418	70.2927	-0.309843	58.5397	-2.02708	-7.43175	0.197023	57.2231	-2.79392	-9.01434	-0.442048	15.6161	14.8336	9.58974	-2.16318	46.2981	28.0019	24.3566	-0.749974	14.676	13.126	12.4322	-1.2322	29.5436	45.0861	38.4391	-38.9258	434.195	58.4066	54.285	-2.90314	31.2068	12.4195	10.2854	49.3965	186.063	286.096	232.952
NCD II	P32×P24	CML84×Tie7922	3.63477	299.423	50.0516	33.7259	0.677513	145.386	80.6898	49.6433	0.381652	61.3094	-0.0925591	-3.05205	0.0511536	59.2853	-2.86547	-5.73541	0.921726	17.3774	29.1798	24.5156	0.811332	49.7236	29.2685	25.2465	0.357429	16.4825	19.0119	12.5416	3.23587	36.7497	54.442	30.2941	65.6535	601.844	75.9953	44.2744	0.373246	32.8539	20.3585	20.0305	-0.981661	139.607	137.467	81.1168
NCD II	P32×P25	CML84×Zheng22	8.95809	274.069	60.0264	56.4452	9.2754	119.465	113.233	87.3412	-0.823737	58.4705	-2.19078	-7.54117	-0.947969	56.622	-3.88188	-9.9701	0.967164	18.4967	40.7803	38.7683	-0.0328399	46.3576	32.9879	24.5165	-0.545509	13.9403	13.1545	6.79603	0.938131	35.0594	87.5476	80.8575	-3.14408	491.319	103.423	84.1665	1.53048	33.9579	20.1463	15.8755	-2.45426	134.318	224.866	218.346
NCD II	P32×P26	CML84×Zheng58	-1.04996	258.077	56.0206	47.3164	-2.54027	110.462	81.5922	73.2231	-1.16198	59.2236	-1.86563	-6.3503	-1.30699	57.5052	-4.30811	-8.5658	0.331897	17.7402	26.3527	17.2346	-0.255114	47.9831	30.4021	28.8825	-0.0793831	14.7075	17.5218	12.6735	-1.57562	30.9544	47.2536	36.6206	-22.9964	456.442	68.1318	65.2711	1.15406	37.1099	27.7203	20.1391	-11.1796	129.151	155.808	113.558
NCD II	P32×P27	CML84×Dan598	-3.92657	272.787	54.3475	53.0055	-0.00898925	128.606	90.4397	80.3889	0.726074	63.3811	1.7992	0.223911	0.602236	61.2406	-0.104103	-2.62645	-0.980142	14.5481	14.854	12.3562	1.47468	55.0048	37.5675	28.7035	0.469318	17.8837	20.1264	6.94969	-1.05944	30.0167	61.1566	54.8442	-8.65107	527.189	87.1147	77.6761	1.24076	34.8154	26.7944	25.7137	-8.15994	131.088	199.559	178.781
NCD II	P32×P28	CML84×Huang C	1.61007	259.913	56.7512	48.3644	1.93919	120.2	98.017	88.4938	-0.318814	62.992	-2.91313	-5.31036	-0.138222	61.597	-3.14993	-4.2161	-0.216367	16.7917	22.0997	15.3538	3.38951	50.6797	41.9565	36.1256	1.0936	16.7517	25.0295	21.8908	3.46447	30.9442	63.4462	59.6288	77.8258	513.099	92.86	92.3306	-1.95769	34.5303	28.5717	26.8466	11.453	133.215	245.108	228.935
NCD II	P33×P16	CML96×B73	7.4621	294.283	52.7168	46.8462	2.22813	137.617	66.8442	57.4753	-0.666622	59.6292	-9.07529	-13.7651	-0.658077	57.069	-10.7251	-15.0791	0.472489	18.1464	53.2195	49.077	0.216959	48.8641	47.621	37.8589	0.0877324	16.0015	25.412	5.36106	0.374049	37.1111	108.758	73.1873	6.99595	591.01	133.715	72.5521	-0.560635	30.4617	18.7762	5.78155	-0.412205	141.737	258.787	208.165
NCD II	P33×P17	CML96×LH132	-0.771452	265.644	53.9229	43.5952	1.06842	120.465	68.5243	55.2884	-0.0646362	57.9033	-7.29836	-16.2611	0.63309	56.1171	-6.92123	-16.4955	0.981364	17.9504	43.9556	33.7137	-0.53797	46.2698	39.6226	30.2593	-0.462218	14.8379	22.6486	7.01849	0.981091	33.0091	85.676	54.0344	2.29118	489.947	110.626	62.2403	0.614668	33.4946	26.3435	16.3136	-6.53502	123.711	200.084	150.246
NCD II	P33×P18	CML96×Mo17	-5.55676	273.45	42.9883	38.4671	0.7235	127.147	70.7797	63.9016	0.0594955	61.786	-8.47488	-10.646	0.366371	59.0897	-7.44566	-12.0722	-0.738027	18.2034	30.964	11.7815	-0.723956	44.3305	49.1311	44.1309	0.53457	14.4261	40.9907	39.639	0.835005	38.6078	113.762	75.5195	30.2033	559.062	183.861	142.378	-3.04287	29.2878	3.10718	1.70505	-6.37395	125.294	274.387	269.408
NCD II	P33×P19	CML96×PH4CV	2.64864	277.33	46.7843	43.7843	4.59242	124.595	75.3697	60.6121	-0.728108	57.9495	-9.97157	-16.1942	-0.42121	57.069	-10.266	-15.0791	0.429682	17.4439	37.5729	25.9924	0.985754	49.9609	46.3547	33.1701	0.0248008	16.1831	27.4556	7.43539	-0.931224	33.86	76.0804	39.148	-17.0175	541.284	103.457	46.7511	1.53853	34.0034	24.4903	18.0805	2.00957	143.572	183.23	110.004
NCD II	P33×P20	CML96×PH6WC	9.1006	294.212	49.9411	41.8288	0.0701904	126.813	64.6936	63.4715	0.240507	60.2591	-8.34212	-12.8541	0.248971	58.5948	-8.65052	-12.8086	1.31001	19.2248	42.6267	24.4815	0.377493	48.8719	42.2738	28.7997	0.137429	15.729	25.0452	6.0885	1.61565	34.4648	84.593	48.456	29.8796	539.494	110.637	54.5794	1.80116	38.2518	25.5221	18.9736	6.73671	147.666	199.124	124.699
NCD II	P33×P21	CML96×Chang7-2	-9.35084	268.101	48.8407	44.9235	-6.53435	133.77	62.09	52.9123	-0.894903	60.2998	-8.39356	-12.7953	-0.736022	58.9118	-8.7178	-12.3369	0.0335919	17.0115	49.1655	47.7424	0.897512	49.6301	41.9463	26.7015	0.428022	16.1228	25.0363	4.30069	0.332515	36.6472	108.187	73.8474	19.4048	588.851	138.364	77.9887	-1.49739	30.1665	13.3514	4.75643	-5.9629	134.176	209.277	149.619
NCD II	P33×P22	CML96×Qi319	-1.36041	275.76	45.6705	42.4286	-0.810197	128.679	59.4613	53.5233	-0.119922	60.8704	-7.00967	-11.9701	-0.460253	58.5624	-8.21279	-12.8568	0.37247	18.4701	30.8915	10.5484	-0.0616905	48.2395	39.3122	25.3081	-0.56868	13.9337	21.5919	10.6921	0.608886	34.8389	75.423	36.1214	-8.61992	490.166	101.304	51.4028	-0.69677	34.2681	12.8614	7.32527	-0.800254	139.351	187.697	118.22
NCD II	P33×P23	CML96×Si287	-19.7665	247.993	40.6249	34.054	-7.17082	109.569	65.0323	41.2431	1.04377	59.0609	-5.81127	-14.587	0.695431	56.9254	-6.71462	-15.2927	-1.80265	15.1843	17.8727	6.55948	-0.892558	46.889	42.3755	33.5504	-0.0178659	14.7924	27.3884	14.7311	-3.38318	29.4675	66.1714	38.0825	-49.2578	437.933	96.9714	55.613	0.575106	35.1387	23.0924	22.0229	5.18914	143.247	222.272	156.334
NCD II	P33×P24	CML96×Tie7922	-0.388573	298.021	45.7659	33.0996	-3.06989	146.031	67.1495	50.3062	-0.480233	59.6151	-7.31505	-13.7855	-0.224939	58.2131	-7.87499	-13.3766	-0.0944765	17.29	35.766	23.8894	-0.447353	47.7852	35.6422	20.3639	-0.195563	15.3138	22.6247	4.56175	0.39119	35.9799	69.9927	27.5648	-0.8384	549.421	89.3269	31.7076	-1.37931	31.555	12.3592	9.57815	0.145831	142.126	158.184	84.3844
NCD II	P33×P25	CML96×Zheng22	6.71515	274.447	55.7856	48.3538	6.3304	120.911	92.1401	55.8634	3.42758	61.8894	-1.34648	-10.4964	3.26214	60.036	-1.68316	-10.664	-1.20954	17.2488	38.8597	29.4061	-0.233424	45.4773	43.8154	39.9866	0.623299	14.4934	32.2559	25.0919	-1.56625	34.6299	115.575	92.3659	-0.0152342	508.517	167.984	135.129	1.36763	34.2487	17.891	16.8678	-0.599063	137.564	265.825	226.04
NCD II	P33×P26	CML96×Zheng58	-4.03829	257.71	51.3118	39.3061	-4.37027	113.023	66.8662	45.6953	-1.53576	58.0174	-8.35033	-16.096	-1.78248	56.2336	-9.66367	-16.3222	-0.197076	18.14	36.153	19.8768	0.685201	48.2437	43.7546	32.6747	-0.332675	13.8385	24.072	15.55	1.2458	35.8507	94.9303	58.2309	5.4111	498.918	127.081	80.6513	-1.65519	34.7543	16.4573	12.5132	-4.64581	137.076	193.239	126.663
NCD II	P33×P27	CML96×Dan598	7.78369	287.118	58.0696	55.2032	1.46781	134.474	80.6615	73.3474	-0.723612	61.099	-6.31122	-11.6395	-1.24746	58.5948	-7.66576	-12.8086	-0.0527442	16.4043	37.2785	32.453	-0.210703	52.6397	43.2476	23.1695	0.474126	17.2728	27.6979	3.29634	-0.500816	32.6502	104.112	82.7454	1.95808	551.868	139.966	85.9933	-1.8541	32.1742	13.9091	11.7284	0.771053	141.41	253.362	200.733
NCD II	P33×P28	CML96×Huang C	6.16563	267.089	56.4513	44.3765	4.31569	126.968	87.8082	63.6707	0.173001	62.6514	-7.64291	-9.39442	0.139186	61.0783	-7.11288	-9.11305	0.432131	18.369	40.9152	26.1893	-0.193776	46.4167	42.9773	35.8339	-0.75159	14.2908	18.7229	3.98452	-0.28561	29.269	79.5341	58.3855	-25.3529	423.989	97.8684	59.8061	5.03975	41.9814	51.8633	45.7849	10.4027	133.556	283.13	263.883
NCD II	P34×P16	Chuan29 Female×B73	-1.80789	277.651	52.8568	38.547	-4.7842	129.031	53.4911	47.651	-1.3359	60.0491	-8.02634	-12.4197	-1.02863	57.9409	-8.04791	-11.3736	0.182344	18.5925	36.1519	22.8128	0.650014	48.4936	41.8004	36.8137	0.384719	16.3647	21.4683	7.75253	0.610973	38.5477	85.4793	79.8915	23.4473	627.351	109.668	83.1623	0.862774	31.6988	23.9789	10.6802	7.26542	151.44	221.403	213.912
NCD II	P34×P17	Chuan29 Female×LH132	-0.104636	258.949	60.3147	58.9807	-4.42022	113.403	55.2099	40.4559	-1.17601	57.8811	-6.89956	-15.5817	-1.01646	55.71	-6.17571	-14.786	-0.355481	17.3498	21.4827	14.6041	0.234085	46.2383	35.055	30.1706	0.162669	15.529	21.2147	12.0031	0.681415	33.9091	63.1543	58.2341	14.0429	521.589	86.9826	72.718	-1.20332	31.4903	19.1355	9.95216	-0.514094	131.757	169.777	166.522
NCD II	P34×P18	Chuan29 Female×Mo17	5.99475	277.639	54.0882	40.5886	3.01166	127.862	68.1664	58.3635	0.202719	63.0184	-6.24459	-8.08901	0.110417	60.0762	-4.53534	-8.10749	0.715328	20.393	29.7938	25.2272	-1.1708	43.0801	39.7647	30.7359	0.071157	14.0289	28.174	19.3187	0.73163	39.7041	88.4681	80.5035	12.7503	561.499	130.799	119.411	0.937626	33.082	16.7869	15.5097	8.99707	142.69	247.345	195.775
NCD II	P34×P19	Chuan29 Female×PH4CV	5.72766	273.047	53.5008	41.5638	4.89198	123.321	69.7959	52.74	0.912215	60.679	-5.3024	-11.501	1.16994	59.9026	-4.43878	-8.37303	-0.278463	17.472	20.5627	15.4113	-0.283491	47.8881	35.9133	27.6451	-0.223012	16.0015	19.3225	6.22979	-0.6188	35.3721	59.0794	45.362	-13.5618	564.63	80.7517	53.0805	-0.093857	32.1847	18.171	12.3767	9.02669	152.614	161.753	123.23
NCD II	P34×P20	Chuan29 Female×PH6WC	4.72022	282.47	52.5534	36.1683	1.15035	126.32	60.7504	56.4542	-0.42877	60.679	-7.29251	-11.501	0.314317	59.9026	-5.26327	-8.37303	0.457865	19.1089	24.965	23.7311	0.308047	47.9989	35.4063	26.499	-0.0195842	15.6382	17.6521	5.47608	-0.188823	33.86	56.2071	45.8508	-2.07211	527.433	74.3809	51.1234	1.34857	37.6129	23.7439	16.9865	3.40843	146.363	156.867	122.716
NCD II	P34×P21	Chuan29 Female×Chang7-2	4.31417	274.405	62.303	56.5719	3.17221	141.904	68.711	62.2097	0.41252	62.6964	-4.32916	-8.55864	0.466724	61.357	-3.56486	-6.14838	0.0957673	17.8099	34.7526	17.6434	0.425066	48.3541	34.0881	23.4439	0.457009	16.218	19.1821	4.91655	0.252339	37.7667	83.2565	79.1581	21.834	611.17	108.324	84.7349	0.412414	31.89	20.1816	11.3478	1.88842	144.053	182.47	167.993
NCD II	P34×P22	Chuan29 Female×Qi319	-13.8039	255.955	43.5956	32.1992	-2.75914	125.157	52.1143	49.3213	0.646701	62.7262	-3.74612	-8.51518	0.890093	61.1552	-2.75754	-6.45705	0.154725	18.9886	19.2504	13.6518	-0.291836	47.2058	32.139	22.623	-0.787393	13.7812	13.2145	9.48061	0.845591	36.2753	58.6457	41.7336	-13.1895	505.486	74.4073	56.135	0.256138	35.0347	15.6849	9.72621	-9.59823	132.578	136.534	107.614
NCD II	P34×P23	Chuan29 Female×Si287	13.8063	274.204	65.8891	63.5023	13.8655	129.033	89.824	59.8137	-0.846105	58.2602	-6.65442	-15.0287	-0.322923	57.1495	-4.92498	-12.5842	-0.199395	17.5238	19.2562	15.7535	0.817686	47.7957	40.4484	36.1329	1.16102	16.0375	30.1185	24.3882	-0.325651	33.7247	62.6161	58.0314	26.8781	533.958	98.7427	89.7344	-0.531486	33.8458	18.8898	18.1767	-3.85514	136.228	161.66	143.774
NCD II	P34×P24	Chuan29 Female×Tie7922	3.59394	294.641	52.3525	31.5903	6.81767	154.345	73.5239	58.8641	0.18599	61.3705	-4.15165	-10.4924	-0.139493	59.541	-4.3922	-8.92613	-0.210761	17.91	23.1141	18.3042	1.6549	49.0839	35.1195	23.6352	-0.329106	15.2465	15.4896	4.10202	1.10941	37.8978	56.7891	34.3646	7.77878	577.928	71.7304	38.5414	0.6796	33.4276	19.3602	16.7165	-1.26645	142.738	127.791	85.1794
NCD II	P34×P25	Chuan29 Female×Zheng22	2.52297	262.893	59.2205	57.0969	-2.60544	110.402	71.1376	36.7389	0.918101	60.4691	-3.16066	-11.8071	0.578485	58.5948	-2.58691	-10.3734	-0.257883	18.9367	33.038	25.0864	-0.0730698	44.8341	37.0258	36.0588	-0.568214	13.3681	14.5328	13.6985	-0.700523	36.6953	92.4278	82.2264	-28.8482	499.574	111.601	95.2128	-1.21686	31.4779	8.64657	7.41294	3.07516	143.264	216.832	196.965
NCD II	P34×P26	Chuan29 Female×Zheng58	-3.22538	251.161	57.7051	54.1991	0.35319	116.174	67.6023	43.8871	0.170259	60.8126	-3.49052	-11.3061	-0.0799361	59.1786	-3.51766	-9.48046	-0.88472	18.1886	20.1714	20.1448	-0.659144	46.0958	33.005	26.7678	-0.227488	14.0099	18.0591	16.9812	-1.29128	34.5133	61.2982	52.3282	-25.1308	488.266	83.5278	76.7944	1.47181	37.695	26.6439	22.0333	-5.00558	138.741	155.23	129.417
NCD II	P34×P27	Chuan29 Female×Dan598	-10.9228	261.05	53.0337	46.4222	-9.87253	121.561	59.9137	50.5595	0.231511	63.1433	-2.74192	-7.90685	-0.0519107	61.0328	-2.42012	-6.64427	-0.203389	16.9899	23.4556	12.2268	-1.40155	50.6453	33.8237	18.5029	-0.353187	16.5117	15.9566	-1.25526	-1.10369	33.247	74.9672	65.1024	-34.1535	535.646	93.8547	80.5261	-0.206189	33.6358	19.4152	17.4434	-9.58632	133.078	179.386	175.851
NCD II	P34×P28	Chuan29 Female×Huang C	-12.1725	241.389	51.1896	48.2001	-9.98005	111.099	60.5772	37.6017	-0.162676	63.4049	-6.12891	-7.52531	-1.07587	61.1057	-5.76281	-6.53277	0.721286	19.3944	30.6214	28.1097	-0.348421	45.4585	35.447	33.0299	0.252797	15.3614	20.4783	11.7746	-0.285485	30.4688	57.8007	51.306	5.26691	474.499	82.0699	78.8437	-2.46664	34.2887	24.3886	19.7231	-3.90962	121.269	185.52	151.372
NCD II	P35×P16	TR0395×B73	-10.3274	279.329	42.6215	39.384	-9.75537	134.947	43.9611	34.8292	-0.287575	58.9993	-5.05843	-5.25427	-0.206908	56.6331	-7.66857	-8.69458	-0.117534	17.5107	51.5186	43.8546	-0.272802	47.0177	39.5087	32.6497	0.891048	19.4521	33.452	28.0814	1.60863	39.1903	107.177	82.8904	71.1804	750.459	160.045	119.105	-1.64594	23.908	9.47137	6.27762	-1.51627	141.562	238.784	207.785
NCD II	P35×P17	TR0395×LH132	-3.72301	265.527	51.0936	38.7986	1.92442	130.635	57.8886	30.5207	-0.00779001	56.9512	-3.51163	-8.54328	0.359559	54.9565	-4.75749	-11.3976	0.369541	17.2929	41.9452	28.816	-0.961731	44.4894	31.8576	25.2471	0.168198	18.1156	30.189	29.7224	-0.332732	32.5399	72.0141	51.8449	-7.97475	574.946	114.27	90.3866	-0.64584	26.7657	17.8901	10.4893	-2.95659	128.219	194.713	159.364
NCD II	P35×P18	TR0395×Mo17	7.41928	289.261	48.8014	46.4733	1.7873	137.524	60.4587	37.4042	-0.370158	60.3474	-5.80881	-8.37978	-0.31626	57.52	-6.09746	-7.2647	0.484349	19.3801	42.3652	19.0073	1.34718	45.045	48.5303	40.9431	-0.659115	15.8797	31.7938	13.7115	1.57978	40.1972	109.357	82.7453	17.9255	642.049	175.959	173.602	3.09322	29.9555	21.7782	6.93199	12.1337	144.73	304.873	285.158
NCD II	P35×P19	TR0395×PH4CV	4.31548	281.832	46.7174	46.1183	6.19192	135.508	64.645	35.3898	-0.244661	57.424	-5.75399	-7.78402	0.0807593	56.6839	-7.09042	-8.61268	-0.200341	16.7682	35.3022	21.112	0.980393	48.5989	39.9007	29.5397	1.42072	20.2263	39.3572	34.2771	-1.82495	33.8109	65.9915	38.9462	-2.727	650.839	115.684	76.4533	1.18353	28.18	19.8777	9.09204	-2.0784	140.413	165.072	105.383
NCD II	P35×P20	TR0395×PH6WC	3.35484	291.301	46.1087	40.4256	-1.53691	134.519	52.4205	34.4023	0.0238528	59.0335	-5.25139	-5.30337	-0.35476	57.104	-7.23138	-7.93538	-0.397014	17.4721	32.4396	13.1327	-0.473568	46.6642	33.5098	22.9814	0.320844	18.5597	28.9262	25.1809	-0.10467	33.5891	69.5571	44.6839	5.04916	609.928	108.996	74.7607	-0.768745	30.2135	13.2977	-6.02771	0.941237	142.8	176.492	117.294
NCD II	P35×P21	TR0395×Chang7-2	-11.0947	269.193	46.8743	40.7145	-10.7277	138.89	48.0952	38.7693	-0.766557	59.4192	-4.7567	-4.93278	-0.819853	57.9409	-6.47128	-6.58611	-0.938931	15.9933	43.8525	41.6013	0.0156509	47.3916	33.2524	20.9868	0.656037	18.9981	29.1382	22.9014	-1.56031	35.599	89.9403	68.8749	-4.36173	660.349	133.544	99.5999	-0.0436017	26.1519	14.6689	7.04962	-4.52957	136.539	199.003	154.014
NCD II	P35×P22	TR0395×Qi319	-1.76867	278.187	44.5437	43.6819	-3.3633	135.44	47.2934	35.3217	0.697624	60.679	-2.16339	-2.55688	0.677116	58.8127	-3.92295	-5.18057	-0.0108536	18.0411	30.5019	7.98075	-2.61215	44.3324	25.8435	15.159	-0.603365	16.5463	24.6299	18.4849	1.05354	36.1282	72.046	41.1589	1.16214	595.212	113.179	83.8497	-2.92918	26.5673	0.0417981	-16.7931	-6.36562	134.715	165.618	110.96
NCD II	P35×P23	TR0395×Si287	-1.25119	269.344	50.0476	40.7934	4.03558	130.089	67.5355	29.976	-0.404082	56.6041	-4.49265	-9.10068	-0.9232	54.4197	-6.87076	-12.2631	0.157326	17.0986	35.7533	19.9935	1.08537	47.5103	41.6753	35.32	-0.74805	16.7095	24.4285	19.6536	1.07021	34.7655	84.2135	62.9086	-6.85779	575.597	123.061	104.53	-0.356502	28.7387	16.1638	1.5631	1.52807	140.515	200.696	151.446
NCD II	P35×P24	TR0395×Tie7922	-3.76473	297.479	43.2903	32.8579	-4.33299	154.081	56.2349	53.9467	0.120713	59.2071	-2.75114	-4.92057	0.0899306	57.6409	-4.88457	-7.06978	0.205	17.5438	40.9305	25.7079	1.02469	47.9006	33.688	20.6546	0.181052	18.3377	28.1882	25.2088	-1.89033	34.543	54.8684	22.4703	-26.8659	618.658	89.8254	48.3051	1.43628	28.9022	19.0506	5.59308	-0.0807381	142.828	149.138	85.2959
NCD II	P35×P25	TR0395×Zheng22	-5.97841	264.589	47.5475	38.3079	0.3335	124.228	67.4573	24.1195	-0.848776	56.6041	-4.53977	-9.10068	-0.751292	55.1355	-5.71187	-11.1091	-0.044261	18.3684	51.3652	37.8057	2.75311	47.1072	46.1899	45.0037	-0.177886	16.3395	27.8966	17.0041	-0.0814699	36.9593	114.84	105.305	-4.03057	599.766	166.009	155.583	0.451221	27.8639	10.3768	-4.91921	2.47927	141.572	254.953	235.538
NCD II	P35×P26	TR0395×Zheng58	9.39624	273.979	57.9391	43.2165	9.60933	136.316	72.5764	36.1975	-0.127418	58.4168	-2.41968	-6.1897	-0.104713	57.0243	-4.41931	-8.06388	-0.151399	18.14	39.1462	19.8768	-0.31006	45.8918	34.3395	26.2067	-0.26426	16.5542	27.6291	18.5415	0.615075	36.0646	84.6555	59.175	8.82886	597.601	133.966	116.383	-0.976402	29.9647	15.0888	-2.99264	6.91632	149.567	205.075	147.318
NCD II	P35×P27	TR0395×Dan598	6.66673	288.836	56.301	50.9828	-1.02889	141.291	64.8854	41.168	1.24373	62.0574	0.454297	-0.343337	1.30481	60.26	-1.00409	-2.84719	0.150833	16.5622	42.0057	33.7279	-1.75886	49.7349	33.1638	16.3727	0.392141	19.8381	29.2953	18.6376	0.588562	34.5842	101.829	93.5701	7.91514	653.089	145.809	120.107	0.257694	28.8176	17.9179	4.05645	-0.407416	141.161	233.719	200.203
NCD II	P35×P28	TR0395×Huang C	5.39847	269.157	54.8022	40.696	5.70419	137.67	74.5724	37.5497	0.701647	62.1711	-3.45795	-6.54434	0.779555	60.8316	-3.69741	-5.4063	0.430508	18.3217	43.712	25.8644	-0.955736	44.2981	33.97	29.6341	-1.59597	16.0937	16.166	15.2439	-1.00423	29.395	68.5305	59.0673	-64.2011	480.405	92.1697	81.07	1.19484	32.6681	37.0456	23.3149	-6.13821	117.944	217.567	213.874
NCD II	P36×P16	TR0403×B73	-1.4565	291.357	50.1043	45.3859	-8.90348	135.358	70.0146	54.89	0.316206	63.1986	-7.28585	-14.9593	0.0147879	60.3385	-7.85392	-14.1885	-0.241794	16.9733	47.1008	39.4397	0.185356	48.3183	53.9032	36.3191	0.332966	16.5463	23.9279	8.94827	-3.571	34.9941	80.8238	63.3079	-49.1655	573.657	109.381	67.4855	1.77844	30.9965	42.4187	37.7879	3.53483	148.895	222.757	221.791
NCD II	P36×P17	TR0403×LH132	-0.486653	271.921	56.2883	44.7902	-2.45876	125.81	83.3559	75.1231	-0.649009	59.9055	-7.90308	-19.3905	-0.261945	57.8187	-6.5122	-17.7721	-0.374019	16.1362	32.6494	20.1996	-0.605873	45.6877	45.3476	28.6206	-0.238484	15.3612	21.0468	10.7928	-0.289557	33.5665	73.4407	56.6354	-10.0797	516.384	103.528	70.9946	-0.0365611	31.0391	37.1664	28.13	-3.32338	130.134	171.944	163.238
NCD II	P36×P18	TR0403×Mo17	-3.74206	281.257	45.9985	42.4202	-0.300376	134.995	88.5837	87.9083	-0.960077	63.353	-9.6136	-14.7515	-0.879764	60.4402	-7.58323	-14.0439	0.171489	18.6541	37.216	14.5492	0.494641	45.0349	60.7238	56.9456	-0.119696	14.0714	29.9976	22.1921	1.39966	41.0005	108.796	86.3973	12.3083	579.975	165.982	151.445	-0.222202	30.3042	23.5733	8.17674	5.50639	140.385	250.139	203.4
NCD II	P36×P19	TR0403×PH4CV	6.57864	287.252	50.9142	48.9284	2.53914	131.414	92.7457	82.9234	-0.79508	60.4691	-9.68311	-18.6321	0.0336549	60.1205	-7.72604	-14.4986	0.452999	17.0084	37.4427	22.8469	1.03295	49.4939	52.6127	31.9253	-0.183965	16.2739	22.4573	8.03819	0.151628	36.7709	76.7377	51.1104	1.76033	598.87	108.561	62.3636	1.33551	31.9961	36.5479	23.8651	3.0262	147.799	157.856	116.188
NCD II	P36×P20	TR0403×PH6WC	-4.6006	286.503	44.9748	38.1125	-2.72249	132.893	79.2641	73.8893	0.593434	63.1986	-7.50655	-14.9593	-0.386064	60.5564	-7.82878	-13.8786	0.016026	17.472	32.6224	13.132	-0.81061	47.1696	44.4935	24.3134	-0.706927	15.1842	15.2847	2.41402	-0.741595	33.9356	67.6147	46.1765	-32.9742	515.448	85.9309	47.6897	2.27353	36.9199	38.8373	14.831	7.20704	151.348	170.293	130.301
NCD II	P36×P21	TR0403×Chang7-2	-4.90764	278.537	53.4379	48.313	-5.73482	143.442	80.0649	63.9681	0.276925	64.0582	-6.35998	-13.8026	0.420143	62.6646	-5.18932	-10.8804	0.265109	16.7842	51.2145	48.6038	-1.48689	46.7315	40.5112	19.3016	0.0869555	16.0813	19.2364	4.03222	-0.628533	37.5142	95.6055	77.9603	-2.2113	606.043	126.017	83.1851	-0.346423	29.5132	29.8351	20.8087	-14.6996	128.651	157.242	139.339
NCD II	P36×P22	TR0403×Qi319	3.19849	286.311	50.1304	47.8781	-0.449373	137.912	77.1988	64.539	0.0400056	63.6169	-6.50486	-14.3964	-0.363888	61.2554	-6.27812	-12.8846	0.258806	17.8976	29.6351	7.12199	1.49131	49.2783	49.6861	28.0066	0.689253	15.4912	28.5385	23.0652	0.317118	36.3752	69.6965	42.1239	27.1904	564.784	113.451	74.451	-0.000959313	33.1596	25.2203	3.85365	3.18718	146.549	166.142	129.493
NCD II	P36×P23	TR0403×Si287	8.42527	282.177	58.745	50.2514	5.185	130.798	105.897	82.0654	0.748599	61.3523	-6.02965	-17.4437	0.582595	59.4092	-5.06558	-15.5102	-0.545134	15.983	27.0802	12.1646	0.729329	47.9967	53.6999	36.7053	0.143368	15.2532	24.9806	18.3051	-1.42502	33.2537	72.2213	55.8244	-17.9309	508.067	108.709	80.5344	0.477277	33.2366	34.754	17.4588	-7.53153	133.737	161.836	139.317
NCD II	P36×P24	TR0403×Tie7922	-1.04267	303.358	47.3647	35.4836	1.36784	159.341	88.5728	64.0059	-0.440405	62.2415	-6.96936	-16.2472	-0.792174	60.2425	-6.95507	-14.3251	-0.0753598	16.8503	35.5583	20.7388	0.130044	47.8484	42.7328	20.5231	0.11957	15.9285	21.7705	8.75888	0.351642	37.7684	66.0803	33.9058	9.09798	598.165	92.152	43.3926	-1.82874	29.3013	21.0692	7.05118	11.6891	156.88	154.362	103.526
NCD II	P36×P26	TR0403×Zheng58	-1.434	266.306	55.0806	41.8004	0.508652	126.774	95.4411	76.4654	0.379764	62.5195	-5.11189	-15.8731	-0.122018	60.4907	-5.19516	-13.9721	-0.0534489	17.8248	36.9201	17.7939	-0.675602	46.3687	45.5666	27.5183	-0.461442	14.0093	19.2687	16.9762	0.0412496	36.4742	82.672	60.9828	-17.0341	515.281	113.978	86.576	0.244077	34.8493	34.2371	12.8207	-3.21687	141.716	165.519	134.336
NCD II	P36×P27	TR0403×Dan598	-1.79531	283.531	54.8974	50.9725	2.14623	144.025	101.244	100.478	-1.21058	63.1986	-6.78535	-14.9593	-0.138792	62.3001	-4.17698	-11.3988	0.413073	16.4113	40.9324	32.5095	-2.91941	49.4168	41.0234	15.6284	-1.09674	16.0015	13.3355	-4.30641	1.33814	36.3172	106.68	103.27	-6.73414	581.983	131.793	96.143	-1.31453	30.9095	26.8678	11.61	-5.20501	138.645	197.227	194.853
NCD II	P36×P28	TR0403×Huang C	-7.83567	259.08	50.5218	37.9529	-4.68368	126.841	95.9293	76.5574	-0.186672	64.8783	-7.86976	-12.6991	0.290151	63.8259	-5.17866	-9.22887	0.485747	17.9638	41.1067	23.4057	0.0363214	46.1326	49.9829	35.0026	0.114644	15.4566	22.3849	12.4673	4.63214	36.0148	101.445	94.8895	68.5424	556.692	136.509	109.823	-3.05748	32.0799	35.0036	21.0946	0.185296	126.55	205.035	173.498
NCD II	P37×P16	TR0412×B73	-8.67447	280.58	50.5166	40.0085	-8.40165	131.467	62.4449	50.4383	0.367917	63.2747	-6.39616	-13.5385	0.3921	60.758	-8.55297	-15.887	-0.330403	18.1459	59.6395	49.0729	-1.4828	44.9608	40.6944	26.8467	-0.391244	13.9424	9.83803	-8.19698	-0.633804	37.2083	100.62	73.6409	-27.1218	523.507	99.5784	52.8438	-2.64781	30.2036	32.1107	30.026	0.705257	143.547	235.163	212.101
NCD II	P37×P17	TR0412×LH132	-5.54552	263.304	58.3349	52.71	-5.23827	118.639	69.6523	59.3078	-0.109798	60.4691	-6.21972	-17.3722	-0.181933	57.9409	-7.74557	-19.787	0.511972	18.2834	52.4531	36.1943	2.02907	46.6333	45.7541	31.2826	0.374505	14.0945	17.1384	1.65671	1.97444	35.1075	89.2858	63.8264	46.0809	500.352	106.718	65.6856	-0.333709	34.3753	44.8796	41.9019	9.85074	140.79	216.026	184.793
NCD II	P37×P18	TR0412×Mo17	0.492667	281.933	52.4356	42.7627	3.90522	134.809	84.9257	81.021	0.034134	64.3716	-7.4119	-12.0396	0.428548	61.7907	-6.88408	-14.4574	-0.0384198	19.7054	46.8038	21.0049	1.11618	43.9671	53.8325	53.2243	0.577293	12.8887	26.7774	26.361	0.0547528	38.9326	106.751	76.9961	11.7094	507.183	145.753	119.886	-0.85335	33.3064	29.9952	18.8937	-3.78719	128.573	249.471	224.154
NCD II	P37×P19	TR0412×PH4CV	-4.42033	272.695	49.2991	41.381	-0.309269	124.173	78.6794	66.7401	0.556931	61.8455	-6.83891	-15.4914	-0.117033	60.012	-9.22903	-16.9198	-1.45361	16.363	34.0883	18.1854	-1.53141	45.2402	37.1241	20.5872	-0.793476	13.7847	9.12956	-8.48696	-2.84108	33.0552	65.281	35.8407	-67.095	457.821	66.1944	24.123	-0.958942	33.335	35.894	29.0484	-14.3852	127.869	136.729	87.036
NCD II	P37×P20	TR0412×PH6WC	6.70273	294.248	54.9233	41.846	1.71071	132.934	76.1938	73.9431	-1.53055	61.099	-9.83168	-16.5115	-0.646152	60.3385	-9.48211	-16.4678	-0.00528303	18.7119	43.91	21.1605	0.0373318	46.3282	39.518	22.0959	0.718752	14.7302	17.7182	-0.648173	1.7204	35.6746	83.509	53.6672	52.6037	528.833	99.1428	51.5248	-2.70041	35.5793	28.4906	10.6614	-1.34683	140.275	166.224	113.453
NCD II	P37×P21	TR0412×Chang7-2	6.02929	285.915	64.471	63.1398	5.03467	149.82	85.016	71.2581	-0.873464	62.9322	-7.23766	-14.0065	-0.449045	61.8376	-7.77906	-14.3924	0.1967	17.977	64.5063	59.1646	0.167851	46.6969	38.0777	19.2132	-0.241555	13.8731	8.13901	-10.2529	0.483862	37.9036	106.306	79.8075	-6.15613	529.905	106.616	60.1714	0.648429	34.1414	43.2749	39.7537	9.23816	150.07	221.292	179.187
NCD II	P37×P22	TR0412×Qi319	1.06312	280.617	53.3287	44.9372	-1.15038	132.819	67.8191	58.4626	0.0651165	63.6664	-5.64642	-13.0032	0.288124	61.9496	-6.58705	-14.2374	0.402577	19.3026	41.5728	15.5312	1.27925	47.3769	41.4988	23.0674	0.0850427	13.0073	14.1607	3.33259	1.42171	36.7568	78.1759	43.6149	19.6596	485.06	91.7798	49.8258	2.00375	38.7977	40.6782	21.5117	4.58821	145.432	180.968	127.743
NCD II	P37×P23	TR0412×Si287	-9.1987	260.995	53.4688	51.3709	-10.0564	111.164	71.4415	49.2711	0.48781	61.1159	-5.57226	-16.4884	-0.154193	58.7146	-7.59209	-18.7159	-0.105143	17.6842	42.553	24.1031	0.912471	46.4905	46.2487	32.4154	1.25926	14.4894	25.4874	12.381	0.905172	34.8609	88.4093	63.3556	54.7578	508.563	119.432	80.7105	-2.34057	34.0521	32.1762	20.3408	10.4638	149.214	212.337	167.013
NCD II	P37×P24	TR0412×Tie7922	4.87786	305.721	54.2763	36.5385	2.79973	156.38	82.2332	60.959	0.646705	63.353	-4.49925	-13.4315	0.555038	61.6319	-6.19893	-14.6772	0.554931	18.7418	52.8876	34.2921	-0.0152133	46.0138	35.0006	15.902	-0.47054	13.4587	8.3387	-8.10477	1.22174	37.9155	72.8531	34.4273	-3.19924	513.675	71.4382	23.1385	0.334615	35.098	38.7267	28.2292	-0.972707	141.7	142.75	83.8318
NCD II	P37×P25	TR0412×Zheng22	3.09568	273.261	60.853	58.4853	-4.48918	114.572	86.6697	53.8469	-0.813684	60.2591	-6.93812	-17.6591	-1.25378	58.1589	-8.52563	-19.4852	-0.0781302	19.1826	60.589	43.9141	-0.870185	42.637	39.8976	31.2437	-0.102378	12.1876	11.8842	5.19066	-1.0974	36.2038	115.069	101.109	-19.6963	455.45	128.655	110.592	0.0976516	34.8078	32.5143	18.7757	-1.0853	137.771	236.615	226.529
NCD II	P37×P26	TR0412×Zheng58	-4.23026	259.951	58.4782	50.7657	1.72444	123.598	86.7578	65.9676	0.0388747	62.203	-4.77335	-15.0029	0.0626947	60.7176	-6.24907	-15.943	-0.252068	18.8874	47.022	24.816	-0.67766	44.6773	37.8289	22.8668	0.0791477	12.6702	14.269	5.79483	-2.95295	32.757	70.9557	44.5766	-39.5431	420.579	83.547	52.2857	0.697429	38.936	43.893	26.0509	-4.11345	138.3	176.215	128.688
NCD II	P37×P27	TR0412×Dan598	3.94922	285.717	62.9383	60.2581	7.45233	144.939	98.8667	94.6241	0.654727	65.0883	-3.18909	-11.0603	0.69092	63.172	-4.24872	-12.5451	0.419863	17.6793	54.0942	42.7477	-0.181264	50.4656	41.7468	18.0824	-1.39645	13.8221	2.68447	-17.3398	-1.07657	33.1795	97.9005	85.7079	-50.8797	465.645	94.4985	56.934	3.85903	39.7164	55.9858	43.4105	-7.40009	133.932	209.004	184.829
NCD II	P37×P28	TR0412×Huang C	4.50166	267.859	62.9016	55.3521	5.85911	132.991	101.34	78.5806	0.205839	65.2952	-6.52565	-10.7776	0.199463	63.7774	-6.58207	-11.707	0.114238	18.8535	50.1206	29.5177	-0.922136	43.4848	38.8418	27.254	0.283033	13.7453	14.8164	0.0152803	0.536838	31.1965	82.7317	68.8159	23.9221	439.879	96.6306	65.7951	2.44447	41.2152	65.7876	55.5784	-1.82968	122.016	219.551	207.623
NCD II	P38×P16	TR0415×B73	-1.51542	278.294	47.4336	38.8675	2.02104	143.162	65.1652	63.8212	1.00579	61.099	-6.62664	-11.2655	0.243285	57.7229	-8.93438	-12.7059	0.120358	17.7144	38.7129	32.5075	-0.226202	45.2522	37.8728	27.6688	-0.467468	14.6394	8.85283	-3.60762	1.38545	39.266	100.624	83.2437	5.08929	581.828	109.725	69.8711	0.198019	28.047	19.9936	15.6496	0.0811874	137.31	233.928	198.54
NCD II	P38×P17	TR0415×LH132	-8.18298	251.221	48.9662	41.8402	-4.11047	121.039	59.9385	40.7966	0.573079	58.3384	-6.3834	-15.2748	-0.118848	55.1177	-7.75427	-16.6457	0.00363308	16.8928	26.0981	25.8356	-0.360231	43.2788	31.7072	21.839	-0.0671178	14.4261	12.8136	4.04838	-0.628209	32.5433	66.2693	51.8607	-8.80518	471.575	83.3764	56.1565	-0.425978	29.2806	20.8035	20.7363	-10.0351	115.291	169.115	133.213
NCD II	P38×P18	TR0415×Mo17	3.85161	275.846	47.2756	39.6806	1.28451	133.46	69.696	55.2458	-0.286389	61.2375	-9.09118	-11.0644	0.375532	58.8514	-7.03412	-10.9992	0.379642	19.2412	29.774	18.1544	0.919284	42.805	45.3653	41.7459	0.85777	13.9424	27.659	19.061	2.55071	41.467	108.839	88.5181	60.5838	582.167	162.833	152.395	-2.60792	26.5494	1.59475	-5.22675	2.68494	129.432	268.947	257.098
NCD II	P38×P19	TR0415×PH4CV	4.51102	272.181	47.1268	41.1144	4.76922	130.524	73.4704	51.8306	-0.606692	57.8683	-9.89376	-15.9575	-0.615648	56.6271	-10.1999	-14.363	-0.365849	16.5685	21.7654	19.6696	0.166293	45.9727	35.7829	22.5396	-0.441699	14.9097	11.377	-1.01838	-1.1342	34.8005	65.5221	43.0131	-30.5626	520.463	79.1054	41.1062	1.27849	30.57	22.0771	18.3443	0.922861	137.565	163	101.217
NCD II	P38×P20	TR0415×PH6WC	-0.180023	277.919	44.5401	33.9748	1.3805	133.876	64.8813	55.7294	0.246222	60.0622	-8.4387	-12.7713	0.594133	58.6925	-7.72287	-11.2395	-0.709921	17.125	18.872	10.8852	-1.85717	43.4685	27.5812	14.5593	-0.165171	14.6195	10.1837	-1.39482	0.0102527	34.0029	66.147	46.4664	-2.42346	499.915	78.1138	43.239	-3.94658	29.3307	4.00367	-8.77346	-17.3241	118.685	132.801	80.5996
NCD II	P38×P21	TR0415×Chang7-2	3.59263	274.033	55.5357	54.7202	-0.15714	145.9	68.2342	66.778	0.0887126	61.0808	-7.00123	-11.292	-0.23116	59.1692	-7.5469	-10.5186	-0.748639	16.1494	30.9595	20.801	0.686051	46.2499	33.344	18.0721	-0.300578	14.5873	7.38471	-5.63268	-2.07079	35.3874	82.4295	67.8711	-41.8291	520.341	91.5935	57.2806	2.04656	30.5371	25.457	24.9999	3.96009	139.179	209.293	158.926
NCD II	P38×P22	TR0415×Qi319	8.17837	278.287	50.1299	43.7336	4.63301	139.875	64.7679	62.7078	-0.255407	60.5323	-7.31989	-12.0886	0.235108	59.0103	-6.72284	-10.7589	0.504939	18.5227	23.1714	10.8633	0.801749	45.9342	33.7336	19.3198	0.0534196	13.7489	13.1685	9.22401	0.104166	35.4777	63.833	38.6173	0.369114	491.879	83.5077	51.932	1.60728	33.3988	18.8973	4.60268	5.07294	140.304	180.317	119.712
NCD II	P38×P23	TR0415×Si287	-3.77925	256.969	49.0443	45.0855	0.802189	123.295	74.6668	43.4212	-1.46161	56.3529	-9.92061	-18.1583	-0.205908	55.7766	-7.78273	-15.6492	0.184919	17.092	23.7735	19.9472	-0.0884291	44.5244	36.3521	26.8155	-0.0124659	13.9909	13.7314	8.51463	1.36462	35.3588	81.0667	65.6887	17.77	497.685	101.59	76.845	-0.61564	30.7746	17.1293	8.758	-0.224868	132.913	188.538	137.842
NCD II	P38×P24	TR0415×Tie7922	-7.1826	284.215	41.7447	26.9337	-10.1657	144.688	58.0225	48.9238	0.965982	60.8587	-5.16678	-11.6145	0.692623	58.8832	-6.0129	-10.9511	-0.860107	16.4445	20.3641	17.831	0.816687	45.8805	31.2766	15.5663	0.726437	15.4289	17.0807	5.34764	-0.42961	36.3026	58.1096	28.7089	17.7644	560.748	78.16	34.4229	-0.718654	29.0423	12.5169	6.10493	-5.01898	132.04	133.026	71.3006
NCD II	P38×P25	TR0415×Zheng22	-4.77427	255.946	48.6071	44.5081	5.11681	125.45	86.8914	45.9281	-0.613407	57.6458	-7.89699	-16.2806	-0.686299	55.8401	-7.74021	-15.5532	0.486931	18.8654	41.3255	41.1172	0.660115	43.2021	37.8381	32.9831	0.466299	13.5295	16.1505	15.535	2.18765	39.5273	121.332	119.57	39.0492	540.305	152.122	149.828	-0.584818	29.1229	8.75438	-0.623091	3.85443	137.098	249.569	224.934
NCD II	P38×P26	TR0415×Zheng58	-1.61882	253.117	52.1347	42.911	-1.26806	121.878	69.4425	41.7729	0.319852	59.6704	-5.52165	-13.3403	0.208979	57.9776	-6.04859	-12.3207	0.319494	18.5767	30.3591	22.7627	0.94644	45.3362	36.2249	24.6788	0.320125	13.6844	15.546	14.2633	1.0837	36.8321	82.46	62.5625	21.629	507.861	107.921	83.8891	-0.94304	32.2931	17.1296	4.54529	3.37188	140.173	189.85	131.785
NCD II	P38×P27	TR0415×Dan598	2.09746	274.42	54.4285	53.9215	-2.09328	136.666	73.8079	58.9746	-0.460896	61.1591	-6.00907	-11.1783	-0.743395	58.8514	-6.46705	-10.9992	-0.108075	16.2691	26.3443	21.6964	-0.714064	48.9676	34.2755	14.5773	-0.179174	15.8126	11.2314	-5.43608	-1.16442	33.1301	86.2178	85.4314	-16.9651	525.669	106.529	77.1635	1.11226	31.9672	23.0788	15.4292	10.0605	145.779	250.148	210.025
NCD II	P38×P28	TR0415×Huang C	3.64521	257.557	54.4317	45.4178	-3.3716	125.033	74.1383	45.4428	0.215316	62.4911	-7.68093	-9.24378	0.0663474	60.758	-6.83639	-8.11589	0.7299	18.5869	33.1187	27.6862	-1.88904	41.5527	29.1057	21.5999	-0.80899	13.4265	5.49826	-2.30441	-3.54221	27.1559	50.0525	46.9507	-66.627	375.439	57.2024	41.507	3.85061	37.6189	48.2714	42.0031	2.51995	120.753	231.063	229
NCD II	P39×P16	TR0423×B73	-1.66436	291	43.4737	41.7805	6.48716	151.912	61.6681	51.094	-0.835868	62.9886	-6.92149	-14.1035	1.48826	62.5181	-5.86927	-13.3918	-0.204934	17.9076	50.8427	47.1151	-0.326876	48.1777	40.6369	35.9224	-0.212006	16.2739	16.9476	7.15466	0.985812	38.094	99.6368	77.7743	9.91632	618.324	118.261	80.5268	-1.38066	28.4941	21.8462	17.3814	1.85698	143.109	237.133	211.148
NCD II	P39×P17	TR0423×LH132	1.10999	273.368	49.6201	33.1902	1.98105	131.414	58.3959	30.7062	1.28212	62.7787	-2.74965	-14.3897	0.679829	59.4666	-5.27953	-17.6192	-0.620549	16.7871	34.3215	25.0482	-0.998405	45.6668	33.159	28.5617	-0.506456	15.3658	15.9307	10.826	1.12055	33.5197	75.6581	56.417	0.597253	512.647	94.8976	69.7571	-1.84106	29.8913	23.2644	23.1372	2.92557	132.275	199.468	167.569
NCD II	P39×P18	TR0423×Mo17	-2.88302	281.967	40.0275	37.3793	2.71203	139.172	61.9518	38.422	-0.145751	65.1094	-6.45047	-11.2114	-0.122491	61.9036	-6.67963	-14.2431	0.0607594	19.4408	39.5822	19.38	-0.676591	44.2353	43.2416	33.7683	-0.297368	14.1663	24.3929	12.0415	1.36447	39.5084	104.013	79.6138	8.08792	561.341	146.886	143.366	0.581104	31.7642	21.4962	13.3885	-1.19136	129.579	255.882	233.075
NCD II	P39×P19	TR0423×PH4CV	2.51619	283.041	42.1865	37.9027	-3.67745	126.361	53.1092	25.6808	0.572446	62.7787	-5.53869	-14.3897	-0.236571	60.5564	-8.37179	-16.1094	-0.226631	17.2262	35.5534	24.42	-0.802081	48.0305	36.0923	28.0247	-0.00253767	16.7279	20.749	11.0522	0.0207386	35.1831	71.3374	44.5853	-3.04689	579.649	95.5219	57.1524	-1.19119	30.1261	20.249	16.6259	-1.67115	138.994	159.147	103.308
NCD II	P39×P20	TR0423×PH6WC	-4.70135	286.253	38.726	37.9921	2.11102	138.89	56.969	38.1423	-0.348639	63.1986	-6.83509	-13.8171	-1.31009	60.3385	-9.44897	-16.4113	-0.793504	17.5599	30.0021	13.7012	1.23166	49.5835	39.6469	30.6751	0.20099	16.3647	19.1455	10.3762	-1.55298	31.6673	58.5327	36.4058	-24.5522	509.456	77.7936	45.9728	1.65174	36.9548	30.9843	14.9396	-2.22471	137.808	163.441	109.698
NCD II	P39×P21	TR0423×Chang7-2	7.8998	291.195	53.0573	41.8756	0.561083	150.902	60.5142	50.0893	1.10845	65.8318	-3.06958	-10.2263	0.587817	63.5384	-5.20809	-11.9784	0.917779	18.3343	60.3665	58.4518	1.06518	49.6552	37.4738	26.7655	0.674283	16.9412	20.5702	9.59503	2.47878	39.1646	107.137	85.7894	67.3488	661.189	138.302	99.8538	-0.0818171	30.4345	24.9761	24.5799	9.49769	148.74	221.057	176.713
NCD II	P39×P22	TR0423×Qi319	-0.133662	282.83	41.8192	37.7998	0.411634	139.938	51.8098	39.1838	-0.460768	64.0582	-5.16998	-12.6449	-0.375815	61.9496	-6.55267	-14.1794	-0.0719436	18.4643	30.5885	10.5137	1.85617	50.0148	39.7739	29.9197	1.18948	16.264	28.9177	28.6322	-0.884171	33.717	59.3092	31.7379	20.6925	543.872	98.5555	67.9917	-2.09829	31.719	12.871	-0.658332	-5.39827	133.856	160.516	109.615
NCD II	P39×P23	TR0423×Si287	-0.373482	273.229	46.522	33.1224	-0.764388	126.012	61.8114	25.3335	-0.229975	61.3158	-5.37181	-16.3847	-0.522431	59.0103	-7.09102	-18.2513	0.253636	17.6792	36.9393	24.068	-1.0084	46.6306	36.7904	32.8144	-0.561304	14.8211	16.076	14.9537	1.14609	34.3679	80.525	61.0454	-1.85928	509.725	101.67	81.1234	0.435983	33.852	28.7853	19.6336	-4.11708	133.044	180.722	138.076
NCD II	P39×P24	TR0423×Tie7922	2.14197	306.394	42.7896	36.8393	-0.447357	158.689	60.5381	57.8347	-0.863179	62.7608	-5.49759	-14.4141	-0.6166	61.1242	-6.93707	-15.3229	0.57071	18.3938	44.1131	31.7985	0.353712	48.4437	33.1434	22.0226	-0.339402	15.7421	15.3711	7.48616	-0.819547	35.1403	56.3869	24.588	-20.0245	554.629	72.9886	32.956	2.32787	34.1146	32.1091	24.6364	11.3548	152.437	162.857	97.7624
NCD II	P39×P25	TR0423×Zheng22	-1.3844	272.191	46.1068	32.6163	1.25133	125.868	69.151	25.1905	-1.52137	60.4691	-6.72063	-17.5393	-0.610023	59.4666	-6.43293	-17.6192	-0.065551	18.8314	51.2556	41.2793	1.09544	46.6636	42.3636	41.1115	1.01436	15.4566	27.5823	22.2465	1.67792	38.2452	120.198	112.449	59.7185	592.644	169.169	164.479	0.521805	32.2553	20.3998	10.0657	9.41012	146.677	261.734	247.636
NCD II	P39×P26	TR0423×Zheng58	-5.62535	261.965	45.1793	27.6344	-7.28864	120.141	51.6626	19.4941	0.76929	63.8511	-2.36111	-12.9273	0.567156	61.886	-4.40899	-14.2675	0.214511	18.9902	42.2322	25.4953	-0.508164	46.9078	35.1205	29.0008	-0.482214	14.2611	15.8497	12.7912	0.287661	35.2637	79.039	55.6401	-12.2441	505.657	102.159	83.0913	-0.130217	35.1317	27.3721	13.7349	-13.2909	127.533	156.659	110.884
NCD II	P39×P27	TR0423×Dan598	1.18093	286.359	49.3269	39.5192	-2.11766	140.925	64.0236	40.1662	-0.186058	65.1652	-3.18149	-11.1353	-0.328918	62.8161	-4.75294	-12.979	0.370243	17.2659	44.1474	39.4098	0.829561	53.5374	41.2481	25.27	0.134687	17.5055	19.2253	4.68795	0.524047	34.0462	96.7903	90.5589	14.0648	588.368	125.951	98.2949	-0.341021	32.5397	25.2273	17.4964	-1.58176	138.16	221.581	193.822
NCD II	P39×P28	TR0423×Huang C	0.559678	267.326	47.8223	30.2464	-2.37878	130.309	64.7648	29.6077	0.589854	66.5969	-4.76327	-9.18291	0.614624	64.8565	-4.9675	-10.1524	-0.467302	17.9082	37.0825	23.0236	-2.24971	44.2182	31.523	29.4002	-0.831128	14.7834	12.0506	7.56883	-6.63225	23.2935	32.2946	26.0498	-123.657	350.079	43.0662	31.9486	1.79633	37.5904	48.0917	41.8955	-5.64415	116.612	208.469	199.743
NCD II	P41×P17	622016-ZCN-2×LH132	13.2159	269.442	59.0247	50.7804	12.7768	140.698	70.2477	40.8437	0.36956	57.7395	-3.09913	-8.92206	0.112054	55.1074	-4.50698	-11.1734	0.712839	17.4229	43.872	29.7843	0.151659	44.5372	35.9286	25.3817	1.01467	16.9095	27.9346	21.9599	-1.20094	32.3478	64.6358	50.9485	4.8981	534.358	93.0671	76.9466	1.0431	28.1967	26.7903	16.3965	4.74519	131.627	209.745	166.259
NCD II	P41×P18	622016-ZCN-2×Mo17	0.192652	269.01	43.0213	36.2191	2.91173	137.859	61.0291	38.0023	1.02859	62.1571	-3.82818	-5.63227	1.19583	59.4305	-2.98906	-4.20508	0.244748	18.9272	39.7857	16.2262	0.952273	43.5845	48.49	45.2381	0.0771538	14.5634	28.2966	15.8602	0.0185717	39.3121	97.237	78.7214	7.27878	577.942	139.703	129.745	0.543362	27.1477	12.4906	-3.091	2.44175	130.745	276.394	267.725
NCD II	P41×P19	622016-ZCN-2×PH4CV	-1.15334	263.339	41.7411	36.5306	0.627842	129.155	57.1078	29.2886	0.919689	58.9993	-4.05393	-6.93486	0.721354	57.7229	-5.39773	-6.95753	0.418258	17.1735	39.3913	24.0394	-0.999917	45.553	34.9207	21.4209	-0.115915	16.6371	20.4152	10.4494	0.685742	36.9977	75.3433	52.0424	11.7596	611.866	97.2478	65.8869	0.498769	27.2373	18.2062	5.4426	-1.93433	136.264	162.244	99.3144
NCD II	P41×P20	622016-ZCN-2×PH6WC	-4.76608	270.156	39.9265	30.2325	-0.156183	135.111	53.2565	35.2512	-0.841197	58.5794	-6.82108	-7.5972	-1.00606	56.8511	-7.65221	-8.36276	0.206115	17.8619	36.1459	15.6569	-0.921679	45.1505	32.8872	18.9921	-0.184787	16.0015	16.8159	7.92646	-0.131881	34.238	66.6813	47.4791	-9.59018	541.829	80.4394	55.2484	0.812898	31.5372	20.3607	-1.91064	1.95351	139.519	175.532	112.302
NCD II	P41×P21	622016-ZCN-2×Chang7-2	-13.6674	253.596	43.2922	41.9127	-6.61582	142.213	51.7927	42.3606	0.280294	60.877	-3.29155	-3.97298	0.401192	59.5603	-3.86747	-3.99577	-0.766532	15.9524	44.4303	41.2392	1.33304	47.6434	37.7377	21.6296	-0.0209945	16.2685	16.0883	5.24324	-2.24762	35.5878	82.7518	68.8218	-34.493	576.758	98.0643	74.3333	0.742441	26.68	19.4198	9.21133	-6.378	130.397	192.018	142.589
NCD II	P41×P22	622016-ZCN-2×Qi319	5.34841	272.28	46.2646	40.6311	3.79303	141.807	54.378	41.954	0.496675	60.889	-2.70681	-3.95405	0.278711	58.8127	-3.93339	-5.2009	0.458845	18.2975	33.0572	9.51537	-1.19246	44.6865	30.4607	16.0788	0.0871133	15.1842	20.7127	20.6264	0.717633	36.4684	67.8232	42.4881	14.9348	555.525	93.1228	71.591	-1.56604	27.6725	6.06107	-13.3317	-3.57315	133.214	168.001	108.61
NCD II	P41×P23	622016-ZCN-2×Si287	1.54349	259.114	49.6019	45.0008	-6.82179	118.443	52.7242	18.5656	-0.641532	56.7776	-5.1002	-10.4394	-0.605805	55.1355	-5.65654	-11.1281	-0.316475	16.4115	31.0556	15.1717	1.36216	46.7215	43.4966	33.0733	0.120418	15.5254	21.9453	20.4163	-1.03661	33.3348	70.0451	56.2044	-12.8749	516.12	93.6724	83.3957	1.02004	29.8573	22.9976	5.51625	1.44844	136.142	197.78	143.621
NCD II	P41×P24	622016-ZCN-2×Tie7922	-5.12836	283.092	40.6295	26.4323	0.629639	158.254	60.6221	58.4185	0.0527635	59.5501	-3.08279	-6.06603	0.685525	58.6349	-3.25495	-5.48749	-0.523501	16.602	34.1494	18.9596	0.248776	46.0591	32.1456	16.0161	-0.34178	15.7623	15.8333	7.62408	0.197557	37.307	61.9519	32.2699	-5.85608	586.208	75.3249	40.5261	0.460727	27.6687	16.1957	1.08654	-1.08367	137.532	144.206	78.4252
NCD II	P41×P25	622016-ZCN-2×Zheng22	-3.62633	253.917	46.7544	42.0922	-6.39717	116.708	57.5233	16.8289	0.505574	58.3694	-2.48729	-7.92846	-0.087997	56.1972	-3.90717	-9.41677	0.572338	18.7717	55.6222	40.8314	0.0844043	43.3729	38.8024	33.5089	-0.0978175	14.367	18.9518	14.2978	0.150319	37.8672	111.144	110.349	0.286187	550.622	135.395	118.885	0.831563	27.9863	12.9425	-4.50154	-3.86726	130.932	236.813	210.321
NCD II	P41×P26	622016-ZCN-2×Zheng58	4.16042	255.719	52.9709	43.1009	4.04196	129.96	64.728	30.0946	-0.538367	58.4168	-3.32762	-7.85369	-0.582618	56.9448	-4.5632	-8.21173	-1.2321	16.846	29.946	11.3255	0.56853	45.7048	37.7244	25.6925	0.176108	14.942	21.7469	18.8722	-0.708136	35.4175	74.7989	56.319	-4.10288	531.209	101.316	92.3432	-1.52206	29.1611	14.0395	-5.59421	-2.7276	135.63	182.472	124.272
NCD II	P41×P27	622016-ZCN-2×Dan598	-0.678898	268.467	50.4082	50.2344	-1.76416	139.767	63.2882	39.9116	0.714185	61.9388	-0.641974	-2.29811	0.984907	60.3385	-0.885954	-2.74149	0.529331	16.7274	44.323	35.0618	-2.40897	48.0192	32.0177	12.3582	-0.120591	17.2728	17.9377	3.29634	0.889351	35.5611	99.0379	99.0379	14.5488	606.263	121.154	104.326	-2.30966	25.9923	8.42051	-6.14533	-1.25604	136.019	229.436	189.268
NCD II	P43×P16	CML312SR×B73	-5.34755	277.905	47.8756	38.6735	-5.02222	134.385	50.1027	46.6004	1.06181	61.6911	-2.9018	-5.17115	0.32553	58.4671	-7.86235	-11.7678	-0.720218	17.2369	39.0196	36.5267	-1.06739	45.8503	39.8775	29.3562	0.594225	16.0606	16.8622	5.7502	-2.57624	36.1558	82.2778	68.7292	-21.8932	578.031	101.695	68.7625	-1.38337	28.5844	22.6196	18.4742	-8.3303	134.858	228.253	193.208
NCD II	P43×P17	CML312SR×LH132	0.446705	263.293	56.8947	50.0584	-0.879734	122.535	56.039	33.6737	-0.785609	57.5158	-4.80023	-11.5892	-0.00950348	55.889	-6.57318	-15.6583	-0.369743	16.8825	29.6171	25.7589	0.276277	45.3546	38.2044	27.6828	0.0749752	14.9277	14.1091	7.66618	-0.172197	33.8508	70.6512	57.9621	2.21007	505.776	89.9086	67.4817	-0.863866	30.9615	28.0676	27.8096	-0.994508	130.291	204.386	163.555
NCD II	P43×P18	CML312SR×Mo17	9.15119	284.589	52.6174	44.1077	8.20625	138.647	70.1263	51.2509	1.09242	63.1524	-3.52675	-4.12119	1.29628	60.4341	-4.63972	-8.79937	0.0661653	19.2908	33.4537	18.4589	0.214391	43.5394	48.0746	44.5877	0.449363	13.8935	23.8721	12.9636	0.662917	40.4307	100.952	83.8068	20.3526	565.121	145.002	144.999	-0.322707	30.9534	18.7303	10.4942	-3.98594	128.721	267.298	255.846
NCD II	P43×P19	CML312SR×PH4CV	0.469901	271.583	47.463	40.8045	1.69636	125.717	60.9834	37.1449	0.97272	59.9838	-3.75165	-7.79553	1.1056	59.0103	-6.52463	-10.948	0.116775	17.4142	31.5744	25.7779	0.692201	47.9379	41.7665	27.7778	0.198394	15.9093	16.2867	5.6177	0.166188	36.9524	73.5808	51.8563	12.7655	586.977	95.8195	59.1392	0.753501	32.1638	28.7621	24.5144	11.5453	154.146	194.906	125.471
NCD II	P43×P20	CML312SR×PH6WC	-1.87134	279.671	46.0797	34.8193	-8.20316	122.558	45.8232	33.6986	-0.103866	60.2482	-5.41498	-7.38911	-0.0457225	58.7146	-7.78989	-11.3943	-0.208998	17.989	28.1761	16.4796	1.31754	48.0825	41.3009	26.7193	-0.506778	14.6374	7.92394	-1.27409	-1.57294	33.2712	60.5044	43.3146	-37.2213	488.303	68.476	39.9118	1.76913	37.1652	32.0758	15.594	4.65812	146.626	187.812	123.117
NCD II	P43×P21	CML312SR×Chang7-2	0.0593149	273.943	56.2181	56.1277	0.356799	144.679	61.5186	57.8312	-0.397075	61.1311	-4.1513	-6.03195	-0.854915	59.2074	-7.58857	-10.6506	-0.268615	16.9925	42.0784	34.5909	0.512859	47.516	37.1636	21.3043	-0.835985	14.4114	3.83938	-6.7706	0.210027	38.5197	95.9148	82.7302	-27.2423	558.114	98.7941	68.6978	1.41177	32.0211	31.8913	31.0745	2.95031	144.129	220.551	168.134
NCD II	P43×P22	CML312SR×Qi319	-1.54255	272.009	47.401	40.4912	1.76744	135.275	54.173	47.5719	0.932306	62.2561	-1.824	-4.30265	1.40025	60.8374	-3.94135	-8.19075	0.0322623	18.4131	25.5453	10.2073	0.657356	47.2291	37.6751	22.6835	0.306613	14.3616	15.4149	14.0914	-0.356022	35.869	63.6479	40.1461	3.78906	518.484	87.0393	60.1499	1.2682	35.1785	25.5113	10.1766	-2.17584	139.014	177.942	117.693
NCD II	P43×P23	CML312SR×Si287	10.2674	274.458	59.9561	56.4216	5.26603	126.024	71.6045	37.4803	-0.743701	57.6069	-5.03118	-11.4492	-0.737663	55.9068	-7.67462	-15.6315	0.0468424	17.317	28.8712	21.5262	-0.189621	45.8625	40.6342	30.6267	-0.0832729	14.2796	13.3652	10.7538	-0.0571832	34.7885	75.7735	63.0162	-4.08607	499.014	94.8941	77.3173	0.482672	33.9917	29.6812	20.1273	-5.51865	133.578	190.21	139.032
NCD II	P43×P24	CML312SR×Tie7922	-0.0875163	294.753	47.6094	31.6402	5.85746	158.976	68.3865	63.6305	0.495295	60.9241	-2.16776	-6.35015	0.554968	59.4075	-5.28216	-10.3486	-0.338184	17.3295	30.3887	24.1724	0.697494	47.2006	35.2193	18.8914	0.68613	15.7481	16.8916	7.52712	-0.270098	37.3136	60.6683	32.2933	21.6907	587.86	81.49	40.9222	-0.537342	31.3424	21.7218	14.5083	2.07834	145.097	156.232	88.2393
NCD II	P43×P25	CML312SR×Zheng22	0.496507	264.66	54.4083	50.8371	3.03855	121.637	73.8304	32.6945	-1.05579	57.7395	-4.85846	-11.2454	-0.991155	56.1972	-7.25777	-15.1932	0.757155	19.4987	50.2529	46.2856	0.889122	44.8704	43.3566	38.1184	0.126992	13.5497	13.4564	10.1682	0.810165	39.0013	115.21	113.79	14.8195	539.261	141.316	133.787	-1.11751	30.709	14.9448	4.7892	0.439247	139.642	256.385	230.963
NCD II	P43×P26	CML312SR×Zheng58	-3.87414	254.305	53.6125	44.9356	-1.59522	119.816	60.2273	30.7079	0.0126638	59.8993	-2.21696	-7.92542	0.0170241	58.4476	-5.39459	-11.7972	0.0506171	18.6709	34.5287	23.3852	-0.0454519	45.7836	37.7464	25.9092	-0.321882	13.4019	10.4159	8.96651	-0.24059	36.3593	77.7961	60.4757	-16.8426	492.574	94.3705	78.3542	1.29417	36.6491	33.2302	18.6474	-1.4409	141.319	192.439	133.68
NCD II	P43×P28	CML312SR×Huang C	-5.66411	251.691	51.6667	43.4458	-5.56886	121.101	62.2229	32.1095	-0.00727193	62.8046	-4.5377	-5.59206	-0.595608	60.758	-6.93656	-8.31057	-0.39186	17.8282	31.1766	22.4743	0.786471	45.6675	42.0795	33.6415	0.919303	15.5143	19.1469	12.8871	1.9267	33.4763	82.3209	81.1527	55.8052	521.057	110.113	96.3919	-2.30548	33.5816	32.6846	26.7632	3.61017	127.802	250.738	248.206
NCD II	P44×P16	CML312SRQ×B73	-0.103972	291.571	44.9777	44.4664	7.57449	156.636	62.2973	48.2816	-0.222614	60.4691	-5.98432	-9.2354	0.0676555	59.2487	-8.59313	-14.1196	0.18605	18.4907	42.968	35.0238	1.67424	47.5254	49.0656	34.0821	0.372486	15.4566	20.2521	1.77319	1.36947	37.3379	90.9301	74.2457	28.1949	577.392	117.291	68.5761	0.755396	32.4155	30.2981	18.9119	1.83463	145.004	185.32	160.568
NCD II	P44×P17	CML312SRQ×LH132	5.24018	276.509	52.7692	37.0038	4.09537	137.165	60.4045	29.8489	-0.624328	57.7395	-5.65326	-13.3326	-0.0868776	56.8511	-7.08107	-17.5949	-0.0117746	17.588	29.7103	28.4321	1.58792	45.5997	42.8546	28.3728	1.53104	16.0015	31.2432	15.411	-0.0834846	31.1759	59.4145	45.4799	37.3188	490.157	99.6883	62.31	-0.773101	32.7446	27.201	20.1191	4.41361	135.68	158.23	143.813
NCD II	P44×P18	CML312SRQ×Mo17	-20.5556	263.305	31.8799	30.4612	-17.9156	122.181	38.0878	15.6638	0.0917032	62.2141	-6.08399	-6.61614	-0.00189687	60.1754	-7.04621	-12.7764	-1.18807	18.3841	22.6457	12.8912	0.47673	42.7352	49.9112	48.9312	0.550124	13.612	31.8188	29.3953	-2.65997	34.3442	73.1076	56.1363	-20.8576	473.184	125.545	105.146	0.174258	33.1427	19.9221	18.3093	-4.44632	128.242	186.36	130.446
NCD II	P44×P19	CML312SRQ×PH4CV	0.0144743	279.55	41.6498	38.5102	0.225469	133.901	57.3887	26.759	0.4502	59.5237	-5.67552	-10.6545	0.542922	59.4871	-7.76	-13.7741	0.314143	17.9591	30.4238	29.7135	1.32814	47.5073	44.3201	26.6301	0.517755	15.8464	23.8832	5.20012	3.6615	37.6841	79.3751	54.8632	69.9927	593.477	112.8	60.9015	-3.39903	29.7036	11.8959	8.96365	-3.6249	138.958	124.097	103.255
NCD II	P44×P20	CML312SRQ×PH6WC	-2.64127	287.324	40.4087	38.5082	-6.12646	134.29	47.5238	27.1268	-0.155386	60.2591	-6.54715	-9.55061	0.320703	60.1205	-7.55983	-12.856	-0.167229	18.3783	26.1453	19.0004	-0.074022	45.6244	37.706	20.2411	-0.394917	14.367	13.367	-3.09787	0.569677	32.6502	59.6634	40.6397	-2.84961	471.948	75.4643	35.2256	0.163094	37.2515	25.4014	15.8624	0.874337	142.824	135.36	117.332
NCD II	P44×P21	CML312SRQ×Chang7-2	6.30359	288.609	53.0744	42.9991	3.28411	157.262	62.8676	48.8737	-0.429995	61.1606	-5.26857	-8.19745	-0.688989	60.4128	-7.67051	-12.4323	-0.383647	17.225	37.8607	25.7813	-1.0589	44.8777	32.9901	14.569	-0.526724	14.3384	10.3901	-7.24285	0.650539	36.1966	86.7566	71.7098	-12.497	522.132	100.909	57.8219	-1.36336	30.9383	19.7076	13.493	10.9011	152.061	177.986	173.249
NCD II	P44×P22	CML312SRQ×Qi319	3.77782	285.752	44.5239	41.5832	3.28186	146.444	54.5981	38.6334	0.201686	61.5879	-4.06286	-7.55607	-0.239821	60.2368	-6.89254	-12.6874	-0.146269	18.5821	22.2422	11.2188	-2.45791	43.0473	28.8531	11.8208	-0.218427	13.4543	16.4496	6.88365	-0.790909	32.6705	50.9822	27.6491	-19.3017	444.667	73.4665	37.3491	-2.21934	33.3833	12.8018	4.55414	-1.41542	139.756	133.887	118.855
NCD II	P44×P23	CML312SRQ×Si287	-0.877897	271.735	47.0698	34.6385	-9.32797	121.085	50.5618	14.6269	0.973879	59.3869	-3.34494	-10.8598	0.412763	58.0967	-6.16928	-15.7894	0.507911	18.1256	29.728	27.2008	1.18472	46.1703	45.581	31.5033	0.571788	14.5524	24.3115	12.8697	0.496449	32.5785	66.9673	52.6604	23.0008	475.374	102.133	68.9172	0.252737	35.4541	27.6326	25.2954	-4.99643	134.082	140.436	139.934
NCD II	P44×P24	CML312SRQ×Tie7922	3.92436	307.187	44.3094	37.1935	0.418066	163.191	60.9465	54.4872	0.0410747	60.5323	-4.00445	-9.14054	-0.405106	59.4869	-7.17196	-13.7744	-0.0431149	17.9721	29.9952	28.7769	0.110833	45.5474	33.9236	14.7272	-0.28591	14.3938	14.3936	-1.71996	0.161015	34.9811	52.4613	24.0236	-9.19492	506.247	67.0546	21.358	-0.189078	33.383	22.2118	21.9635	1.27546	144.276	117.397	87.1739
NCD II	P44×P25	CML312SRQ×Zheng22	-6.84622	265.739	43.9657	31.6676	-3.79225	124.461	61.726	17.823	-0.0684144	58.7893	-4.36309	-11.7568	-0.504929	57.7229	-6.83461	-16.3313	0.167324	19.2564	42.5154	40.6151	0.240361	43.1551	41.9429	32.8385	-0.0355474	13.0049	17.66	12.2447	1.26778	36.6953	105.66	103.839	15.8981	489.613	141.662	126.388	1.13006	34.6489	22.5087	18.2334	-4.21513	134.969	175.892	142.535
NCD II	P44×P26	CML312SRQ×Zheng58	1.09994	267.701	49.7778	32.6397	1.87728	132.944	62.5975	25.8529	-0.278656	59.6704	-3.82056	-10.4343	0.09633	59.5664	-5.66402	-13.6591	-0.804414	18.1634	26.0183	20.0315	0.922287	45.6848	41.2601	25.6375	0.0526785	13.3942	19.0813	11.8401	-1.95518	31.8811	58.06	40.7107	-27.6931	430.997	85.3306	56.0579	2.08164	39.1289	34.581	26.6754	7.99352	150.735	159.609	149.25
NCD II	P44×P27	CML312SRQ×Dan598	17.8399	302.028	58.9154	49.6478	14.3932	161.073	82.077	52.4814	0.980096	63.1986	-1.17823	-5.1384	1.22188	62.5181	-2.85146	-9.38066	1.23782	18.3256	40.537	33.8182	0.012482	50.0669	40.9204	17.1495	-0.149121	15.8199	16.1464	-5.39243	3.10311	35.4855	99.6383	98.6147	43.8567	558.949	130.187	88.3799	-0.532167	34.1339	24.2265	23.2529	2.17608	143.836	180.188	158.468
NCD II	P44×P28	CML312SRQ×Huang C	-8.53234	257.245	43.6059	27.4588	0.853546	137.178	68.0397	29.8617	-1.22869	61.6456	-7.40192	-7.46947	-0.919882	61.4732	-7.76583	-10.8952	0.268492	18.8361	33.3477	29.3981	-4.08539	39.7291	27.1513	16.2633	-2.00384	12.2089	0.638423	-11.1641	-6.07289	22.7131	25.6155	22.909	-130.826	283.699	24.9091	6.92924	4.16948	41.7489	55.3398	53.1502	-10.8448	113.329	145.427	103.648
NCD II	P45×P16	CML330×B73	-0.136788	289.322	47.1828	44.3707	0.442838	141.601	59.5224	57.0866	0.463318	62.3588	-5.83919	-11.4692	-0.622002	58.5948	-8.65493	-13.38	-0.390173	17.5458	36.9188	30.3842	0.557698	50.2743	47.0688	41.8375	0.564671	17.9084	28.6181	17.9169	0.836566	36.4306	89.4103	70.0116	29.5854	638.009	123.114	86.2739	-1.178	30.2843	19.2305	6.99729	2.49057	145.088	272.949	215.452
NCD II	P45×P17	CML330×LH132	-0.675136	268.378	52.0925	39.2405	-2.82128	122.345	57.325	35.7246	0.126403	59.694	-5.40827	-15.2524	-0.145635	56.8281	-6.08719	-15.9917	0.850202	18.0813	34.526	34.3635	-0.218731	47.6585	39.2613	34.1688	-0.836279	15.8938	19.8406	14.6342	-0.701492	30.1835	56.9246	40.8489	-40.235	471.83	77.5831	56.2411	3.5106	36.8305	40.2305	30.1256	-4.25664	126.438	211.24	155.762
NCD II	P45×P18	CML330×Mo17	4.50125	286.146	46.6557	44.896	3.00005	135.193	67.4544	49.9776	0.0824347	63.4086	-6.96024	-9.97879	-0.528465	59.6846	-6.8373	-11.769	-0.902489	18.301	23.0659	12.3809	-1.23622	44.8877	45.6967	36.3398	-0.772891	14.5486	27.6585	14.9169	-2.95888	33.6709	72.5147	53.0753	-62.5663	490.702	113.321	112.741	-0.636042	32.1346	14.1196	13.5346	-6.65557	125.461	281.747	269.9
NCD II	P45×P19	CML330×PH4CV	-2.05934	275.26	42.761	42.711	1.36942	127.142	64.4133	41.0458	-0.858068	59.4192	-8.60413	-15.6425	-0.385135	58.5948	-8.1869	-13.38	-0.0852796	17.191	25.9312	24.1658	-0.864507	49.1801	39.6369	31.0889	-0.0430607	17.5452	26.5741	16.478	2.74459	36.3928	75.9258	49.5566	45.418	628.129	109.99	70.2962	-2.59413	30.3107	11.9815	7.09057	-3.60525	138.405	176.317	102.447
NCD II	P45×P20	CML330×PH6WC	-1.94068	285.808	42.8378	37.7779	-0.288806	132.224	58.7647	46.6837	-0.889154	60.7291	-8.52467	-13.7829	-0.0506543	59.7849	-7.11611	-11.6207	0.577448	18.7543	29.7835	21.435	1.30613	50.87	43.5637	34.0656	0.159867	17.1814	25.0175	15.8846	-0.50663	31.1995	55.0109	34.3908	-7.47282	526.551	82.0685	50.8709	3.71069	40.6013	34.3184	26.2812	2.84388	144.222	195.75	119.458
NCD II	P45×P21	CML330×Chang7-2	0.431273	280.521	52.4564	45.5406	1.21926	147.294	65.849	63.4014	-0.694964	62.0994	-6.57509	-11.8375	-0.935647	60.2019	-7.03809	-11.0042	-0.19827	17.0417	37.7018	26.6382	1.20825	51.0103	41.5099	30.225	0.17116	17.2959	23.0232	11.8896	0.0953315	35.267	85.0354	67.3	12.4815	606.337	116.457	83.2741	-0.827563	31.2763	18.6202	10.5021	-0.343021	140.245	227.81	160.908
NCD II	P45×P22	CML330×Qi319	6.87781	286.636	48.3788	48.046	8.16271	143.422	64.8912	59.1064	1.58992	64.1799	-2.9105	-8.88377	1.54332	62.0557	-3.07432	-8.26378	1.31121	19.6709	30.4233	17.7355	0.146649	49.5173	38.6649	28.6274	-0.142642	15.7897	25.0773	24.7202	0.309583	33.3966	56.6698	30.4861	-0.163348	523.032	89.1097	61.5545	1.66426	37.0691	23.0857	16.0978	-0.294577	140.305	193.31	119.714
NCD II	P45×P23	CML330×Si287	9.75619	280.154	55.4463	45.3499	4.28298	126.793	74.4628	40.6589	-0.181389	59.4354	-6.1791	-15.6195	0.416705	58.1364	-5.0749	-14.0576	0.943588	18.1926	31.3232	27.671	-0.0729291	48.7781	43.3954	38.9309	-0.00842741	16.2318	27.0432	25.8952	1.64824	33.3559	73.821	56.3033	27.1583	538.758	110.936	91.4399	-0.499463	34.5041	21.9222	21.9062	-4.27038	134.236	206.142	140.21
NCD II	P45×P24	CML330×Tie7922	0.480042	301.527	44.738	34.6657	-7.89108	146.979	56.9473	51.2827	-0.241224	61.4538	-5.40502	-12.7541	-0.613064	59.3147	-6.45977	-12.3158	-0.339138	17.3074	26.2715	24.014	-1.33611	47.9659	32.0938	20.8191	0.348375	17.2877	26.6229	18.0394	-1.40849	33.0372	46.0392	17.1316	-8.03402	566.635	75.2783	35.8341	-0.0480776	33.3262	19.7167	17.7446	-1.91859	140.51	158.068	82.288
NCD II	P45×P25	CML330×Zheng22	-1.67053	268.699	49.2406	39.4071	-10.9512	109.399	58.0638	21.3631	0.856617	60.9181	-3.88298	-13.5146	1.12601	59.3896	-3.09347	-12.205	-0.352499	18.3679	37.1445	36.4933	-0.434185	46.346	41.7086	40.7692	0.152737	15.4528	27.4652	22.0591	1.21247	36.2656	106.988	101.452	26.5822	559.524	151.091	143.905	-3.14834	30.1727	4.74941	2.95917	-2.33139	136.281	268.303	222.997
NCD II	P45×P26	CML330×Zheng58	-5.25228	259.133	48.7635	34.4441	-2.63787	120.526	62.8361	33.7059	0.385395	61.5382	-3.76902	-12.6342	0.0890323	59.5948	-4.60369	-11.9016	0.941363	19.5405	36.6985	29.1319	-0.29716	48.3308	39.5114	32.9142	0.139963	15.7411	27.7879	24.3363	1.10931	34.5712	74.1784	52.5837	23.4536	541.37	114.158	96.0225	1.01454	37.864	27.9343	22.5805	7.70397	149.874	224.797	147.826
NCD II	P45×P27	CML330×Dan598	-4.5185	277.454	49.5587	43.9492	7.88731	146.664	81.6989	62.7025	0.491628	63.9139	-2.95468	-9.26142	1.30802	62.64	-1.63486	-7.40002	-0.651206	16.0679	24.3549	19.4018	1.09174	55.0116	45.416	28.7194	0.479464	18.7081	27.3453	11.8798	-0.364099	31.6439	81.3113	77.113	8.16705	582.486	121.429	96.3124	-0.125967	34.3423	22.6555	21.3346	10.6684	151.756	285.002	222.736
NCD II	P45×P28	CML330×Huang C	-7.15035	256.411	46.8633	33.0318	-2.9333	125.489	69.8349	39.2117	-1.40036	62.6777	-8.47439	-11.0164	-1.38774	61.0411	-7.48131	-9.76365	-1.76753	16.4314	17.3097	12.8786	0.0108637	47.6908	42.1589	39.5625	-0.231551	16.2408	23.021	18.1734	-2.29939	26.1122	47.0335	41.3028	-59.3323	414.419	67.5378	56.199	-0.591918	36.7897	34.2802	29.9815	-0.105662	123.496	260.492	236.474
NCD II	P46×P17	CML504×LH132	10.3896	284.468	59.1487	44.1679	-0.691769	130.675	46.7534	15.9514	0.998213	62.1488	-7.03211	-20.2432	0.750388	59.4666	-7.72053	-21.243	-0.000525255	17.2894	31.0508	28.7899	-0.399177	46.2988	39.2162	30.341	0.47475	15.5474	22.0457	12.1358	0.043068	32.3856	66.5104	51.1248	14.618	500.741	91.8122	65.8145	-0.803541	34.6904	47.4327	43.2026	1.53094	138.526	195.479	180.213
NCD II	P46×P18	CML504×Mo17	5.04376	291.714	47.7775	47.7153	2.59231	140.985	53.2248	25.1004	0.179145	65.0883	-9.46743	-16.4709	-0.527231	61.4283	-9.65789	-18.6449	-0.251817	19.0105	30.0037	16.7377	0.117037	45.0617	50.9939	45.3969	0.248838	13.9129	27.9577	19.8025	-1.35422	36.7331	86.1516	66.9967	-7.90875	519.417	130.45	125.19	-0.558182	34.3865	35.2516	22.7493	5.57281	143.989	268.046	224.828
NCD II	P46×P19	CML504×PH4CV	-1.40983	280.935	43.9966	42.3772	0.468727	132.441	49.4679	17.5188	0.0785416	61.9388	-9.91473	-20.5127	-0.166012	60.5564	-10.6178	-19.7996	-0.179207	17.1559	27.9981	23.9123	-0.263553	48.6018	41.8848	29.5475	-0.110931	15.8199	18.6064	5.0242	-2.22865	32.8771	57.2943	35.1088	-42.643	514.126	74.5841	39.388	1.18553	36.2644	49.0338	40.3888	-2.41207	145.898	158.928	113.407
NCD II	P46×P20	CML504×PH6WC	5.43482	298.209	47.3516	43.7558	1.3689	140.082	48.1393	24.2985	1.46716	64.6684	-7.78947	-17.0098	0.940069	62.5181	-8.45942	-17.2016	-0.10678	18.1289	27.6449	17.3855	1.03439	49.419	43.3758	30.2416	0.0924968	15.4566	16.9205	4.25123	0.73413	33.8978	66.6354	46.0137	14.3705	522.452	83.5952	49.6964	0.0279541	39.0926	42.1908	21.5887	0.316466	147.994	168.971	125.199
NCD II	P46×P21	CML504×Chang7-2	3.71258	288.828	55.0442	46.3775	2.28776	154.562	54.4236	37.1475	-1.10265	63.2747	-9.88127	-18.7983	-0.612624	62.2674	-9.35019	-17.5336	0.194203	17.493	44.2371	34.9633	-0.0675956	48.5552	38.4067	23.9573	0.86119	16.3285	20.6337	5.63139	-0.895708	35.7335	85.3897	69.513	14.3756	582.289	111.371	76.0051	-1.5235	32.7544	38.601	34.0761	-1.15544	145.732	197.17	171.117
NCD II	P46×P22	CML504×Qi319	-0.851285	283.932	45.2599	43.8963	1.92842	143.388	45.9304	27.2321	-0.976673	63.1963	-9.52129	-18.8989	-0.622955	61.6319	-9.3039	-18.3753	0.14798	18.5665	25.1576	11.1254	-0.200098	47.9913	38.1265	24.6634	0.118888	14.3938	18.9521	14.3472	-0.330957	34.2136	58.8984	33.6782	-1.84253	495.41	82.1775	53.0227	1.21982	38.7987	41.6947	21.5148	8.30671	155.206	186.926	143.049
NCD II	P46×P23	CML504×Si287	0.999996	276.423	51.4547	40.0906	-3.47701	125.233	49.1685	11.1229	0.263161	61.4629	-8.39088	-21.1234	-0.389571	59.0726	-9.36282	-21.7648	-0.0329395	17.2749	26.9704	21.2308	0.303624	47.9754	45.1561	36.6447	-0.907498	13.6753	11.6064	6.06681	0.932602	34.0978	75.7166	59.7798	-13.4451	472.212	88.3007	67.7937	-0.588303	36.5893	43.1198	29.3073	-0.8492	143.957	187.309	157.605
NCD II	P46×P24	CML504×Tie7922	0.65585	306.728	45.6362	36.9885	2.68022	163.75	56.0619	45.3006	0.112816	63.3908	-7.7387	-18.6493	0.0151594	61.6854	-8.39872	-18.3044	0.420134	18.1255	34.6755	29.876	-0.0516598	48.0711	36	21.0841	-0.262495	15.0194	14.3947	2.5516	0.370467	36.2737	58.835	28.6064	-3.73231	544.994	71.0378	30.6464	0.948183	36.4965	45.3873	33.3386	0.226391	148.954	145.377	93.2439
NCD II	P46×P25	CML504×Zheng22	0.685674	276.081	51.4175	39.9173	2.39881	128.949	60.2055	14.4205	-0.335573	61.3089	-8.66029	-21.3211	0.114437	60.1205	-7.81291	-20.3769	-0.604727	18.1745	38.2591	36.351	-0.0423317	45.5586	43.5389	40.2368	-0.0929333	13.5497	16.8108	16.675	-0.0800704	36.4306	105.407	102.369	-3.84564	503.153	130.594	128.574	1.37002	36.8651	41.4079	25.7958	0.239397	145.151	235.532	227.451
NCD II	P46×P26	CML504×Zheng58	-2.97397	266.437	50.9747	35.0297	-2.58946	126.774	48.6312	12.4901	0.0687854	62.8046	-7.21896	-19.4016	-0.172484	61.0758	-8.0199	-19.1118	0.237135	18.8951	34.5158	24.8668	-0.543056	46.9057	39.2797	28.9949	0.740293	14.684	24.4966	22.6098	1.26557	36.185	80.3537	59.7064	42.8571	534.831	115.525	93.6548	-2.237	36.7865	36.947	19.0922	5.00695	153.477	192.886	153.783
NCD II	P46×P27	CML504×Dan598	-2.99349	284.004	51.2258	43.9328	3.77292	148.749	61.6914	31.9896	-0.756862	64.2484	-7.69253	-17.5488	0.0975413	63.172	-6.56605	-16.3356	-0.0540333	16.7239	31.9632	29.0295	-0.598711	52.1419	41.4405	22.0047	-1.11461	15.4566	9.09976	-7.56507	3.00286	36.4684	106.409	104.116	16.0199	564.396	118.402	90.2158	-0.240107	36.4022	44.085	31.4434	-0.308087	147.079	222.015	212.79
NCD II	P46×P28	CML504×Huang C	-8.70334	259.884	46.9279	31.7085	-3.438	131.184	54.0324	16.4032	-0.0489503	65.6121	-9.15446	-15.7987	-0.0768161	64.0945	-8.31508	-15.1138	0.219642	18.4774	34.2932	26.934	1.24912	47.7498	46.553	39.7351	0.675178	15.4901	22.179	12.711	0.657667	30.5268	69.8335	65.1919	29.4281	477.237	96.6197	79.8758	-1.35766	38.198	54.8792	44.1891	-12.1296	117.772	190.685	165.685
NCD II	P47×P16	CML85×B73	-10.0093	278.08	51.4829	38.7607	-8.60987	128.826	57.262	47.416	-0.964172	60.4691	-5.68312	-8.67226	-1.49398	57.287	-8.29267	-10.8885	0.5032	18.4687	48.3936	45.2056	-1.60202	44.0572	36.1174	24.2974	-0.438682	15.4339	13.7313	1.62373	0.424123	34.824	69.8544	62.5139	-9.57095	537.257	84.8409	56.8582	-1.00341	29.6909	32.0039	31.9842	0.314772	129.6	219.498	181.777
NCD II	P47×P17	CML85×LH132	0.0110329	267.694	63.772	60.5451	2.53202	123.976	74.8154	62.1728	-0.446486	58.6589	-3.82817	-11.4062	-0.468811	56.0691	-4.69642	-12.783	-0.510225	16.7504	28.142	24.7749	0.414254	44.2341	36.5031	24.5284	-0.177042	15.0819	16.8301	8.77827	-0.741805	28.949	41.1943	35.0882	-19.3107	431.159	59.4535	42.7733	0.185091	32.737	40.1599	35.1389	-0.15994	117.223	177.222	137.121
NCD II	P47×P18	CML85×Mo17	6.31892	286.593	57.3718	45.1226	7.1153	135.586	83.5053	77.3597	1.44735	64.3113	-2.61618	-2.86931	1.29857	61.0758	-2.09929	-4.99495	0.0257841	19.2588	32.8019	18.2624	0.538268	42.6048	46.9544	45.463	0.349955	14.2003	28.5875	18.7942	0.222709	35.6583	71.5475	62.1104	14.0568	505.73	115.45	111.773	-1.36495	30.6377	21.3309	9.36724	-11.2628	107.541	211.483	206.092
NCD II	P47×P19	CML85×PH4CV	0.0732281	276.023	53.5078	43.1064	-2.00288	120.047	70.3206	57.0333	0.344742	60.1598	-4.35621	-9.1394	0.226289	58.7704	-5.4229	-8.58106	0.0828935	17.3887	30.9183	25.5937	-0.210122	45.7771	37.0455	22.0183	-0.135014	15.9821	18.3123	6.101	2.56898	35.023	59.5217	43.9274	36.759	557.874	83.6164	51.249	-1.33044	30.8064	27.5086	19.2595	2.87075	131.569	154.24	92.4473
NCD II	P47×P20	CML85×PH6WC	-1.70731	284.672	52.1567	37.2299	-5.10311	123.687	61.8193	61.795	-0.334843	60.8212	-5.37399	-8.14048	-0.53493	58.8648	-6.0954	-8.43422	0.241921	18.4483	31.0114	19.4536	-0.685984	44.8205	33.3285	18.1224	-0.659886	14.8905	11.2061	0.433014	-0.0610434	30.4509	42.3215	31.1662	-18.9463	453.482	54.2942	29.9347	-0.471414	35.6512	30.4934	10.885	-9.52482	118.541	135.082	80.3802
NCD II	P47×P21	CML85×Chang7-2	-5.84366	272.876	59.5775	55.7	-3.17595	139.176	69.8007	59.0914	1.11925	63.4514	-1.40669	-4.16803	0.961777	61.6635	-2.24603	-4.08077	0.251303	17.5208	45.924	37.753	0.148235	45.8929	34.0722	17.1607	0.159007	15.8126	15.3712	2.29396	-0.200282	33.7772	66.1597	60.2326	0.836012	533.096	87.1683	61.1359	0.700029	32.0359	36.5589	31.1351	2.47868	129.754	191.956	141.392
NCD II	P47×P22	CML85×Qi319	-0.478724	277.909	54.2426	43.5388	1.9354	133.472	66.5651	59.2414	-0.655222	61.4726	-3.93518	-7.15673	0.0459461	60.1225	-3.56414	-6.47784	-0.0476189	18.3416	24.6596	9.77932	-0.00336667	45.3099	33.6855	17.6981	-0.00289503	14.4583	17.8274	14.8596	1.53827	33.4311	48.0228	30.6208	24.1913	485.791	72.7082	50.0515	0.0564527	34.6933	27.506	8.65697	10.7383	138.026	178.864	116.145
NCD II	P47×P23	CML85×Si287	-4.41364	264.614	58.2394	57.7839	-3.35912	115.428	75.3469	50.9918	-0.346079	58.8085	-3.96527	-11.1803	-0.25957	57.0243	-4.2655	-11.2972	0.318161	17.5967	30.4977	23.4891	0.463155	45.2568	40.5519	28.9015	0.72102	15.4901	24.6849	20.1426	0.299228	30.8127	50.6119	44.386	26.8369	476.841	83.3188	69.4386	-0.396271	33.8393	33.2636	19.5887	-11.2094	113.985	150.471	103.971
NCD II	P47×P24	CML85×Tie7922	0.692411	300.369	53.7797	34.1486	-0.0208874	151.127	74.107	55.5516	-0.330583	60.9022	-3.10221	-8.01814	0.186751	59.6787	-3.32531	-7.16819	0.428035	18.1041	35.7383	29.7227	0.825971	46.0706	33.5579	16.0451	1.16172	16.6299	25.0397	13.548	-0.175606	33.0759	38.4468	17.2688	31.3432	544.416	65.9909	30.5079	-1.10119	31.5051	26.3732	15.1027	-0.137992	128.978	129.877	67.3275
NCD II	P47×P25	CML85×Zheng22	-1.09217	267.908	60.3827	60.0934	4.2699	120.898	93.8569	58.1464	0.449828	60.0491	-1.98618	-9.3066	1.20294	59.0307	-0.965171	-8.17616	-0.0836264	18.6663	43.3212	40.0407	0.110299	42.8331	38.6723	31.8473	-0.551616	13.2773	12.8068	11.0727	0.379056	34.238	82.2222	74.896	-11.8486	459.497	101.942	92.4134	-0.0392484	32.5138	25.549	10.9478	6.74121	132.041	241.517	212.949
NCD II	P47×P26	CML85×Zheng58	3.23209	266.248	65.1766	59.6775	-2.48227	116.958	74.1264	52.9933	0.629986	61.3206	-0.832372	-7.38622	0.338617	59.4086	-2.27458	-7.58833	-0.721514	17.9071	28.5916	18.338	-0.002575	44.568	35.7715	22.5662	-0.26589	13.8641	15.8726	15.7638	-1.3435	30.9242	46.4443	36.4873	-27.5991	428.722	66.4989	55.2342	2.59173	38.6732	44.9026	25.2002	-0.0388307	128.819	169.47	113.01
NCD II	P47×P27	CML85×Dan598	-3.17123	277.431	60.8173	55.6104	-4.32789	130.726	76.9668	71.0024	-0.948462	62.0116	-2.72187	-6.34259	-1.28574	59.6104	-3.85672	-7.27439	0.0173673	16.766	33.5723	31.8185	0.55732	50.4198	40.0031	17.9753	0.126811	16.8843	17.762	0.972993	-0.624812	30.189	61.2544	54.2128	-5.35852	507.365	89.4846	70.9947	-0.0462747	33.654	34.1243	21.52	16.1911	143.966	250.474	206.17
NCD II	P47×P28	CML85×Huang C	15.0313	277.223	71.5593	66.2597	12.0704	136.77	104.009	78.9082	-0.234749	63.3811	-4.50037	-4.72546	-0.403115	61.5899	-4.2112	-4.22714	-0.568458	17.66	29.4926	21.3187	-0.691952	42.9306	35.2981	25.6322	-0.306105	14.6951	14.3726	6.92633	-2.56821	24.6492	29.5424	25.9141	-46.3467	365.809	45.1272	37.8774	2.47047	39.0841	59.5898	47.5339	-7.07536	103.214	187.358	181.214
NCD II	P48×P16	DTMA227B×B73	5.6876	304.317	53.3411	51.8529	1.5013	142.813	70.6389	63.4216	-0.182479	61.6693	-4.53809	-8.21327	0.0356962	59.8433	-7.15448	-12.3328	-0.023928	18.0472	40.9794	34.3787	0.562169	46.8837	37.9612	32.2717	-0.609171	15.171	9.8916	-0.107129	1.95115	39.7902	87.2506	85.69	9.22209	605	95.9751	76.6364	1.2145	30.9948	33.0058	28.551	1.64976	146.239	218.236	217.954
NCD II	P48×P17	DTMA227B×LH132	-9.02985	269.194	50.943	36.9854	-5.91552	119.404	64.2577	49.2609	-0.273494	59.2504	-3.62984	-11.8135	-0.129237	57.4353	-5.56449	-15.8604	-0.254553	17.1117	27.4396	27.413	-0.75527	43.7269	28.5276	23.1005	-0.209551	14.957	13.7916	7.8775	-0.0935046	33.0365	55.463	54.1622	-5.06848	494.351	71.3811	63.6985	0.577999	32.2159	33.3009	32.9878	-3.21556	129.471	171.575	161.897
NCD II	P48×P18	DTMA227B×Mo17	4.06824	294.883	49.6882	49.3202	2.77686	135.123	78.5888	68.9104	-0.264062	63.0184	-5.2743	-6.20531	0.0874438	60.8913	-5.40856	-10.7975	0.222856	19.5615	31.6612	20.1212	-0.252156	42.4767	38.7762	30.6111	-0.490563	13.2674	17.637	6.79191	-0.80679	38.068	76.7834	73.0655	-30.5882	510.034	101.766	85.5251	1.39116	32.4798	24.6239	15.943	1.23801	135.346	239.087	194.793
NCD II	P48×P19	DTMA227B×PH4CV	-5.35006	281.139	44.3992	43.0643	-4.04962	121.876	68.668	52.3508	0.821935	61.0555	-3.67987	-9.12683	-0.164437	59.4063	-7.3625	-12.973	0.444585	17.856	30.9318	28.969	0.634354	47.2839	35.0234	26.0346	0.601768	16.6265	20.9785	10.379	-1.32562	34.5676	52.2637	42.0559	1.41428	571.479	77.5445	54.9375	1.04817	32.271	29.2331	24.9293	3.55443	147.557	158.241	115.833
NCD II	P48×P20	DTMA227B×PH6WC	-7.8467	289.073	43.1215	39.3514	-5.09745	127.569	63.1097	59.4668	-0.102001	61.4726	-5.08164	-8.50611	-0.000855938	60.4255	-6.56802	-11.4799	0.170492	18.4825	28.0217	19.6751	-0.880107	45.2887	28.5413	19.3564	0.0461958	15.5042	13.7927	4.57228	1.83496	35.7861	61.6114	54.1474	32.4627	553.841	77.5354	58.6901	-2.36261	32.846	16.76	2.16009	1.05077	144.42	158.75	119.76
NCD II	P48×P21	DTMA227B×Chang7-2	8.63186	297.892	60.256	51.5893	5.08721	151.315	80.6976	72.9677	1.54334	64.294	-0.849642	-4.30675	0.793151	62.5215	-3.9133	-8.40938	0.515265	17.8904	44.7167	33.2111	-0.0985884	46.3084	29.1864	18.2214	-0.00941133	15.5518	11.556	0.606806	0.350019	37.7667	79.1963	79.1581	5.93475	587.144	93.857	77.4728	1.25544	31.6773	30.5188	29.6672	-1.69374	140.886	182.72	162.101
NCD II	P48×P22	DTMA227B×Qi319	1.33129	290.26	48.8033	47.7054	5.82196	141.235	72.4325	68.5028	-0.30078	62.2455	-3.46384	-7.35567	0.48672	61.5899	-4.26249	-9.77412	-0.226947	18.2679	21.2292	9.33821	-0.239791	45.7358	28.8002	18.8045	-0.0544135	14.3144	14.463	13.7165	1.46587	36.7979	57.7106	43.7755	19.2221	529.771	76.9847	63.6362	-2.18404	31.5388	12.558	-1.22271	0.180108	142.771	160.128	123.577
NCD II	P48×P23	DTMA227B×Si287	1.73097	281.299	54.4667	43.1454	-0.453858	122.21	80.7736	52.7677	-0.0719862	59.5011	-3.60284	-11.4404	1.34265	59.6532	-3.08582	-12.6114	-0.155067	17.2291	24.4891	20.9094	1.06933	46.5253	37.5855	32.5145	0.452001	15.1287	19.5156	17.3395	-1.69167	32.261	52.1329	51.1727	-12.3033	486.65	74.9477	72.9241	1.54834	34.8699	33.0727	23.2309	-3.8148	136.683	168.546	144.589
NCD II	P48×P24	DTMA227B×Tie7922	8.36503	318.582	51.554	42.2827	-0.596526	154.427	74.3438	58.9487	-0.210251	61.441	-2.99843	-8.55301	-0.442366	60.0762	-5.7169	-11.9916	0.112817	17.8945	30.6832	28.2209	-1.30445	44.6025	23.5148	12.3472	-0.775896	14.5999	7.87054	-0.31272	-3.05731	33.6334	36.5094	19.2454	-70.9815	491.041	41.9059	17.7128	2.22602	33.9183	31.7671	23.9192	-3.25831	141.162	129.544	83.1339
NCD II	P48×P25	DTMA227B×Zheng22	1.46905	281.009	54.4612	42.998	5.54626	126.05	96.5248	57.5686	0.67082	60.6886	-1.72555	-9.67292	-0.057488	58.7969	-4.54041	-13.8657	-0.173755	18.6818	39.6285	39.104	-0.885624	42.4995	30.7508	30.6812	0.0790657	13.8156	15.083	11.2045	-1.79284	35.5053	81.7374	68.5024	-27.0917	493.204	100.822	79.403	0.139559	31.7786	18.9844	8.43903	-1.8502	138.754	214.974	202.215
NCD II	P48×P26	DTMA227B×Zheng58	-0.321095	273.235	55.1804	39.0418	2.87309	126.19	83.0327	57.7431	0.400139	61.5093	-1.30655	-8.45147	0.626991	60.7236	-3.27379	-11.0432	-0.705893	18.0284	26.2391	19.1393	0.976101	46.209	34.1649	27.0791	0.0881915	14.1258	15.7862	13.7013	-0.953838	34.7531	58.95	53.3864	-11.1759	494.095	79.315	78.9047	1.28314	36.4506	32.5476	18.0047	4.03235	148.194	178.592	145.048
NCD II	P48×P27	DTMA227B×Dan598	-4.81741	286.325	52.7889	45.7032	-1.01613	137.914	82.3159	72.3984	-2.21797	61.1606	-4.7861	-8.97041	-2.38178	59.541	-6.95141	-12.7756	0.0300389	16.8843	30.8095	25.7198	0.181297	50.7061	34.7507	18.6452	0.125093	16.7902	15.2176	0.410248	1.37659	35.6296	83.0087	69.0923	28.9396	590.612	106.642	99.0513	-2.46777	30.3185	17.0483	9.47599	-1.94989	141.13	203.72	200.136
NCD II	P48×P28	DTMA227B×Huang C	-5.27597	267.456	51.5537	36.1011	-7.63655	120.939	75.7421	51.1789	-0.0826572	63.9517	-4.34433	-4.81622	-0.381741	62.6379	-5.50229	-8.23886	-0.0186863	18.3154	30.886	25.8211	0.854224	45.1391	35.3635	32.0952	0.738077	15.6469	19.5935	13.8519	2.46009	33.1167	67.4645	57.1665	55.0558	516.161	91.0899	87.7538	-3.41932	32.2803	27.5838	21.8511	4.00282	129.596	213.735	182.27
NCD II	P49×P16	TR0501×B73	-1.077	289.51	45.5701	44.4644	4.42176	147.978	56.6082	45.6636	-0.124819	61.6693	-5.07311	-9.19742	0.0739617	59.494	-5.18023	-8.24647	-0.502902	17.0053	45.6519	39.7026	-0.201717	48.3126	49.3234	36.303	0.061054	15.1234	18.9403	-0.420483	-0.683273	36.9271	100.858	72.3286	-9.9686	560.624	112.237	63.6805	-0.963358	30.6149	24.0901	14.0339	-1.64134	136.346	227.017	196.445
NCD II	P49×P17	TR0501×LH132	3.26036	273.442	52.9624	38.5511	-2.48186	125.082	49.8182	23.1259	0.421367	59.8876	-3.16689	-11.8208	0.235829	57.4128	-2.86994	-11.4562	-0.303427	16.4999	34.1314	22.9089	0.955454	47.6304	47.0414	34.0897	-0.292336	14.1564	17.4425	2.10317	-1.36403	31.5373	71.5345	47.1663	-27.9763	446.258	82.9761	47.7732	2.93244	36.3683	42.42	35.464	3.37165	129.456	198.184	161.868
NCD II	P49×P18	TR0501×Mo17	-5.65796	277.114	40.3674	40.3228	-3.30678	131.284	51.8476	29.2306	0.373199	63.598	-4.92343	-6.35758	0.686509	61.1028	-2.48913	-5.76532	-0.911658	17.8641	30.0959	9.69775	-0.401132	44.5205	53.6294	52.1356	-0.180148	12.86	26.2276	25.5492	-2.21162	36.4345	95.1636	65.6392	-40.9246	474.513	127.887	105.722	-0.626196	32.2604	17.6082	15.1598	-8.40548	119.101	234.03	218.502
NCD II	P49×P19	TR0501×PH4CV	-3.18725	275.26	41.0732	39.4725	-3.82116	124.348	49.7204	22.404	-0.336705	59.8392	-6.13783	-11.8921	-0.152471	59.0307	-5.42574	-8.96098	0.641191	17.4897	39.7873	26.3232	-0.0173221	48.825	46.2258	30.1424	0.00188233	15.3088	20.989	1.63114	0.909454	36.574	84.3685	50.3012	16.9834	561.864	102.607	52.3306	-0.124589	32.8962	24.894	22.5312	-3.07026	134.33	154.028	96.4863
NCD II	P49×P20	TR0501×PH6WC	-4.05189	284.825	40.7241	37.3038	0.242114	135.152	51.8458	33.0387	-0.20799	61.3089	-5.86356	-9.72808	-0.79009	59.2487	-5.89895	-8.62478	0.0812348	17.8303	33.9517	15.4522	0.453616	48.8152	45.2665	28.6503	1.07971	15.8199	26.2093	6.7016	0.477731	34.2002	77.4026	47.3162	41.2	537.393	100.971	53.9774	-3.56106	33.4455	13.3771	4.0247	1.63778	138.406	168.459	110.608
NCD II	P49×P21	TR0501×Chang7-2	3.38157	284.6	52.7577	44.2048	1.62058	150.092	58.7688	47.7452	0.1063	62.7993	-3.69542	-7.53359	1.21172	62.5525	-1.27041	-3.52955	0.150101	16.9623	50.9592	50.1806	-0.467065	48.1327	40.6677	22.8787	-0.0927967	14.7506	14.7862	-4.57627	0.0907931	37.2788	104.709	76.8436	-6.27993	549.745	112.822	66.1683	-0.116217	32.1036	25.2166	19.579	-2.50263	133.475	192.881	148.314
NCD II	P49×P22	TR0501×Qi319	0.793399	281.68	44.0924	42.7252	-3.81867	133.838	44.3728	31.7451	-0.362819	62.1258	-4.1905	-8.52526	-0.290115	60.4255	-3.50701	-6.80988	-0.707421	17.2245	23.536	3.09318	-0.388067	47.7803	41.0272	24.1153	0.0209011	13.6719	19.7672	8.61231	-0.684255	34.4191	68.1642	34.4811	-10.603	474.761	86.3496	46.6447	1.73081	37.2516	26.757	16.6694	4.00562	139.995	176.528	119.229
NCD II	P49×P23	TR0501×Si287	-5.90112	265.624	45.5219	34.5902	-6.9168	117.991	50.4992	16.1455	0.595275	60.1107	-3.18631	-11.4923	-0.343631	57.5793	-3.78136	-11.1994	1.17656	17.9978	41.5606	26.3039	-2.52354	45.1252	40.1985	28.5267	-0.891784	13.0671	12.9585	1.34956	-0.0223969	33.7016	83.7521	57.9232	-23.8523	449.917	92.5959	59.8713	1.77188	36.8914	33.8012	30.3749	-3.98759	129.909	178.544	132.466
NCD II	P49×P24	TR0501×Tie7922	9.11833	311.293	47.7894	39.0274	6.92424	164.192	65.2294	61.6242	-0.0384699	61.5552	-3.37369	-9.36548	0.2945	60.4255	-2.55295	-6.80988	0.104233	17.323	37.8446	24.1258	-0.967529	47.1322	36.6858	18.7191	-0.295982	14.362	15.4098	-1.93709	1.95047	38.4125	76.4214	36.1894	16.9156	553.753	83.6841	32.7462	0.123669	33.6139	23.9942	22.8071	2.7851	140.603	145.649	82.4096
NCD II	P49×P25	TR0501×Zheng22	8.39286	279.891	53.4899	41.8188	7.74182	130.49	74.1363	28.4492	-0.0589191	59.9012	-3.56916	-11.8008	-0.110123	58.3567	-2.54897	-10.0004	-0.339528	17.9531	46.5123	34.69	0.406299	45.9842	48.9352	41.5469	-0.0094197	13.0093	19.1917	12.2827	-1.28657	35.7829	114.634	98.7707	-18.0123	477.098	137.327	120.602	-1.22519	32.2118	14.7293	9.91725	1.97761	135.98	241.715	222.284
NCD II	P49×P26	TR0501×Zheng58	-9.94179	255.572	44.8013	29.4966	-5.19765	120.363	50.945	18.4808	0.199039	61.2505	-2.29256	-9.81406	-0.768944	58.9401	-3.48519	-9.10071	0.614334	18.7857	42.8011	24.1439	0.869525	48.2952	47.1829	32.8163	0.203606	13.5234	21.7272	12.919	0.0856759	35.5639	87.1868	56.9651	9.98596	490.072	112.168	77.4481	1.10078	38.0662	31.8623	23.2351	3.45386	141.014	188.167	133.175
NCD II	P49×P27	TR0501×Dan598	-2.77231	280.328	49.2521	42.0404	5.39833	146.572	69.5627	44.28	0.297591	63.6185	-1.5179	-6.32739	0.111082	61.6463	-1.01551	-4.92712	-0.308535	15.9828	35.6596	29.0497	1.32792	54.0455	50.1237	26.4589	-0.127393	15.8199	17.3383	-5.39243	0.0246625	34.049	105.068	90.5745	-0.80677	535.681	122.043	80.5381	1.74618	36.3304	33.2214	31.1841	-3.24758	133.23	215.652	183.337
NCD II	P49×P28	TR0501×Huang C	6.28574	270.975	53.1811	37.3014	-1.96488	128.854	61.8532	26.8392	-1.1325	62.8442	-6.51002	-7.46748	-0.343476	62.2886	-3.54024	-3.93655	0.24304	18.0142	39.9988	23.7519	0.815048	47.2927	49.1052	38.3975	0.504092	14.6951	22.5296	6.92633	2.43047	32.8584	94.3094	77.809	48.3812	484.302	114.719	82.5385	-2.53857	34.959	31.0828	30.2147	5.54903	124.541	236.156	233.05
NCD II	P50×P16	TR0582×B73	-3.13687	290.571	51.8105	44.9941	2.77653	161.401	66.8035	52.0742	-1.33549	63.6185	-6.73832	-14.5094	-0.914861	60.9924	-10.9356	-20.078	0.604795	19.6006	49.9922	40.3753	-0.732155	44.9328	40.2607	26.7677	-0.451052	14.6394	10.4464	-3.60762	0.528096	39.0391	92.0408	82.1848	-4.59941	579.493	100.864	69.1895	2.72676	32.6232	51.2739	45.0191	5.1423	144.912	247.576	215.068
NCD II	P50×P17	TR0582×LH132	-7.46502	265.838	55.1993	45.7396	-7.64488	134.988	57.3993	27.1871	-0.477305	62.1488	-4.52776	-16.4844	-1.06939	58.5948	-9.64021	-23.2197	-0.66433	17.6266	28.72	26.2379	0.720216	44.5458	38.8873	25.4059	-0.200602	14.2762	13.3617	2.96723	0.398238	34.2002	68.2315	59.5925	4.52442	492.259	83.5148	63.0057	0.42476	32.1788	43.4626	32.8347	10.5918	138.459	218.932	180.077
NCD II	P50×P18	TR0582×Mo17	6.03187	291.926	53.6898	47.8227	6.4591	156.118	75.9481	47.0966	0.498326	66.883	-4.64541	-10.1226	0.433086	63.3366	-7.40189	-17.0062	0.723879	20.9872	38.7684	28.876	1.90843	43.9807	53.4567	53.2717	0.389585	13.4578	25.4508	18.8621	0.523353	40.0701	94.3966	82.1675	16.1947	545.132	134.391	132.476	1.78412	32.9889	35.6198	17.7603	7.31385	136.602	283.133	265.339
NCD II	P50×P19	TR0582×PH4CV	0.615374	282.184	50.3838	46.3008	0.950715	144.189	68.9862	35.8569	0.0728232	63.4086	-5.36341	-14.7915	-0.460095	61.2103	-10.1885	-19.7925	-0.228312	18.1078	30.2335	29.6842	-0.961561	45.0314	36.1658	20.0306	0.212416	15.5474	17.849	3.21514	0.583723	37.1489	70.5541	52.6638	19.9459	578.326	91.7097	56.7937	-3.06977	28.2692	21.6746	9.43735	-2.52603	136.656	158.435	99.8888
NCD II	P50×P20	TR0582×PH6WC	-9.76077	282.238	44.7939	36.0565	1.89199	151.871	66.382	43.0947	-0.218363	64.4584	-5.73184	-13.3808	-0.00791355	62.5181	-8.99807	-18.0788	-0.370185	18.8665	28.3134	22.1615	-0.100322	45.4119	36.4346	19.6811	-0.219656	14.5486	11.2767	-1.87302	-2.6155	32.0076	50.8217	37.8717	-43.2702	466.423	59.8713	33.6425	-1.33594	33.9888	28.7772	5.71451	-0.695193	137.855	167.399	109.77
NCD II	P50×P21	TR0582×Chang7-2	14.6911	299.031	67.2132	63.9369	11.947	175.488	81.2749	65.3465	0.772528	66.6254	-2.67846	-10.4687	1.09949	64.9275	-6.0306	-14.9216	0.267098	18.5669	47.0203	32.9721	-0.990903	44.7595	32.0411	14.2672	-0.131063	14.7404	10.0843	-4.64226	0.0519623	38.1406	89.2416	80.9318	-4.96395	564.561	99.7291	70.6465	0.997098	31.5351	39.9532	29.0851	1.892	139.652	206.445	159.805
NCD II	P50×P22	TR0582×Qi319	-5.41448	278.593	48.1804	43.8919	-5.977	146.749	54.5123	38.2683	-0.182491	65.466	-3.85803	-12.0267	-0.332038	62.8708	-8.02789	-17.6166	-0.542924	18.8766	23.0921	12.9814	0.140695	45.4597	35.4537	18.0873	0.064235	13.7433	14.9586	9.17952	-0.519286	35.4847	58.3333	38.6446	-8.87319	489.991	75.5487	51.3488	-1.55578	32.2832	22.8322	1.1087	-8.86455	128.907	154.635	101.865
NCD II	P50×P23	TR0582×Si287	12.5472	287.194	64.0582	57.4478	7.90788	147.884	83.3159	39.3383	0.135202	62.8105	-3.86989	-15.5952	0.248246	60.6584	-7.50339	-20.5157	1.45486	19.7637	40.1055	38.6965	-0.494583	44.3048	39.0282	26.19	-0.38645	13.6005	12.3298	5.48666	1.37677	36.0014	77.481	68.6999	5.56678	492.835	91.0533	75.1219	2.6411	36.0788	47.4654	27.5031	5.63654	141.315	203.012	152.877
NCD II	P50×P24	TR0582×Tie7922	-2.50074	302.796	49.0452	35.2322	-1.86469	170.472	67.7141	60.6206	0.200698	64.9542	-2.98733	-12.7145	0.439677	63.0579	-6.91936	-17.3714	0.39803	19.1044	36.8559	36.8216	-0.665767	44.5846	30.5055	12.3021	-0.601448	14.0846	8.477	-3.83116	1.04284	38.4055	61.9324	36.1646	-5.32356	545.014	67.2741	30.6512	0.043384	31.8518	32.697	16.3693	-3.93117	135.669	137.035	76.0081
NCD II	P50×P25	TR0582×Zheng22	1.15798	275.777	57.6994	51.1888	-1.8701	135.947	76.0792	28.0906	1.47971	64.5997	-1.1758	-13.1909	1.58275	62.5368	-4.69857	-18.0543	-0.617432	19.1628	40.4269	37.2398	-1.00604	41.7225	36.5437	28.4287	0.0136141	13.0604	14.0228	12.7238	-1.9683	36.0018	93.3974	87.2285	-23.6545	484.956	115.172	106.813	2.50602	34.2612	37.2067	16.9105	-1.37846	134.406	237.774	218.553
NCD II	P50×P26	TR0582×Zheng58	8.04594	276.681	63.695	51.6842	-3.36957	137.26	67.3659	29.328	-2.10283	62.1085	-5.80723	-16.5386	-1.60157	60.5947	-9.29664	-20.5991	-0.0102695	19.6487	35.0649	29.8469	-0.628013	43.9483	35.2509	20.8619	0.10644	13.4543	15.4955	12.342	1.09265	37.4715	78.9214	65.3845	17.8546	511.44	100.303	85.1853	-1.4852	33.7984	31.1933	9.41853	-2.43581	136.906	179.783	126.383
NCD II	P50×P27	TR0582×Dan598	-10.1594	276.062	53.0739	51.3451	-10.7344	145.508	64.0204	37.0996	0.497219	66.978	-1.28381	-9.99492	0.457359	64.4798	-5.19858	-15.5082	0.135682	17.9146	35.9847	28.3007	1.74648	51.6147	44.654	20.7712	0.661741	16.6371	18.6508	-0.505334	-0.800368	34.1246	83.9834	77.4661	10.1285	560.116	110.886	88.7733	0.798294	33.7007	39.4617	21.6887	-0.169847	138.09	227.179	193.672
NCD II	P50×P28	TR0582×Huang C	-6.00924	261.802	54.5258	43.527	-1.63151	144.257	76.1717	35.9202	0.390531	67.5271	-4.17644	-9.25704	-0.0599988	65.0593	-7.47003	-14.7489	-1.21366	18.0451	26.5448	23.9642	0.92501	44.5533	41.8962	30.3809	0.523625	14.7427	17.6339	7.27269	0.0229378	31.3515	66.2839	63.0445	11.5122	460.932	84.445	73.7304	-4.22426	31.5915	34.0694	19.251	-10.6496	110.124	197.257	194.524
NCD II	P51×P16	Jiao51×B73	4.35931	304.817	51.8895	51.6773	4.83529	167.529	55.4483	30.725	0.753485	64.9788	-5.41288	-13.7987	0.120096	61.9393	-7.75299	-15.892	-0.0115793	18.3236	57.1223	50.5328	1.29613	49.6092	48.8063	39.9611	-0.402933	15.9325	17.756	4.90673	-0.248282	38.6977	106.753	80.5916	-16.8971	614.671	121.859	79.4602	2.34616	30.93	47.4476	37.4923	-3.74741	141.398	281.912	207.428
NCD II	P51×P17	Jiao51×LH132	2.77386	282.825	56.6319	40.7345	-3.12143	143.581	48.3702	12.0375	1.07687	62.9743	-3.97105	-16.4579	1.48116	61.0573	-3.86184	-17.0897	0.787596	18.4179	49.8853	37.1962	1.37	47.8437	43.3465	34.6902	-0.230683	15.4911	20.3767	11.7297	1.11806	35.355	88.8864	64.9813	13.1141	548.324	113.527	81.5712	0.715363	31.1568	42.6502	28.6158	8.41728	141.66	265.624	186.553
NCD II	P51×P19	Jiao51×PH4CV	-9.96824	278.349	41.3504	38.5072	-12.0402	135.268	40.4116	5.55082	-0.475601	62.1315	-7.93212	-17.5759	-0.183137	61.3992	-8.10986	-16.6254	-0.0715863	17.6039	40.8498	27.148	-1.69217	46.9489	36.583	25.1417	-0.569565	16.0104	18.8773	6.28888	-0.423256	36.5769	81.3462	50.3131	-26.0778	579.778	99.7707	57.1875	-1.92447	28.1019	24.099	8.78969	-8.67943	135.879	181.848	98.7514
NCD II	P51×P20	Jiao51×PH6WC	15.0767	313.824	53.6826	51.2832	11.2143	165.263	61.5646	28.9562	0.720313	64.6684	-6.08707	-14.2105	0.952044	63.39	-5.89873	-13.9221	0.041041	18.6171	40.0024	20.5466	0.527663	48.688	40.767	28.3151	-0.0117365	16.0015	19.865	7.92646	1.03232	36.0904	84.0361	55.4582	17.4995	574.668	105.017	64.6577	2.48306	36.4952	41.428	13.5101	2.6078	146.534	212.535	122.976
NCD II	P51×P21	Jiao51×Chang7-2	8.18607	299.274	59.0948	48.9196	2.20691	169.817	57.5034	32.5099	0.745204	65.8694	-4.45582	-12.6172	-0.102949	63.637	-6.08215	-13.5867	0.408124	18.0473	60.8057	59.787	-2.52272	45.8758	30.3251	17.117	-0.811944	15.3045	11.9941	-0.993013	-1.43372	37.0899	100.023	75.9475	-49.2099	567.791	109.349	71.6228	-0.475099	28.7503	31.0173	17.6858	-3.4699	139.666	241.455	159.831
NCD II	P51×P23	Jiao51×Si287	-1.46361	279.932	51.8604	39.2949	5.54533	149.591	63.1624	16.7274	0.718278	62.6649	-4.79541	-16.8683	0.126004	60.4481	-5.90696	-17.9169	0.0679813	17.7162	39.4916	24.3277	-0.694398	46.7531	40.9483	33.1633	0.0620687	15.294	23.508	18.6216	0.0148935	35.0745	87.8354	64.3565	1.14302	535.888	117.389	90.4198	-0.998999	31.1261	30.3588	10.0002	-9.28006	131.774	213.985	135.804
NCD II	P51×P26	Jiao51×Zheng58	3.45732	278.841	56.3878	38.752	1.63848	146.337	57.3142	14.1886	-0.900857	62.5818	-5.77854	-16.9786	-0.509709	61.5985	-5.91225	-16.3548	0.414256	19.4126	47.7159	28.2867	1.08547	48.3099	42.9422	32.8567	-0.271041	14.3218	20.1035	19.5855	0.947366	37.7612	95.3366	66.6631	2.44108	543.503	122.849	96.7946	1.8518	35.8228	42.303	15.9723	17.3888	162.106	266.222	168.053
NCD II	P51×P28	Jiao51×Huang C	0.455547	275.015	53.8965	36.8482	6.52335	156.481	68.4499	22.1035	-0.206893	66.201	-6.69673	-12.1773	-0.228241	64.803	-6.04918	-12.0034	-0.470038	18.1281	41.0297	24.5344	0.787595	47.064	43.9203	37.7282	0.929345	16.3934	27.9929	19.2837	3.96146	35.725	107.191	93.3213	85.3518	582.248	144.173	119.456	-5.75655	28.7466	25.122	8.51213	0.641558	126.791	291.593	245.451
Tropical diallel	P35×P36	TR0395×TR0403	4.42867	261.803	57.69	44.8055	4.21784	125.617	87.7491	80.3739	0.238567	62.2941	-9.72055	-14.592	-0.15403	60.8706	-9.98016	-14.9315	0.307684	15.4338	32.7894	28.7495	1.30502	47.8433	21.3311	21.0635	-1.19626	14.8612	2.78652	-0.452601	-0.575072	33.1689	55.7827	45.0509	-44.4749	493.216	63.7338	57.2687	-0.0573922	27.3086	35.3441	33.6174	5.41106	142.599	171.543	135.538
Tropical diallel	P35×P37	TR0395×TR0412	2.177	252.263	64.407	62.0968	5.49491	121.853	86.0387	74.9695	-0.39174	61.5518	-11.1132	-16.1752	-0.908717	60.0544	-11.5091	-16.6453	0.720861	15.9268	34.6002	28.3667	0.293191	46.9477	14.3108	10.1509	0.524493	15.6714	13.4235	4.97452	1.34984	33.1796	57.2636	47.5982	32.4199	511.571	76.0855	75.075	1.03245	31.3067	33.5097	18.3166	6.86063	139.227	185.867	163.089
Tropical diallel	P35×P38	TR0395×TR0415	2.57351	238.264	59.5392	57.5283	0.00369559	114.942	74.0501	65.0455	4.51492	62.2941	-2.03762	-4.25972	4.40295	60.8706	-2.14909	-4.41684	0.270698	15.481	30.1677	23.5695	1.233	47.1484	20.0628	19.3051	-0.161892	15.9955	12.6312	7.1455	0.398251	33.2201	53.4871	40.9383	3.12574	527.847	74.4238	66.8293	0.72426	28.8152	43.0776	40.989	5.51408	140.884	183.869	157.216
Tropical diallel	P35×P39	TR0395×TR0423	1.78066	237.551	55.5214	54.0154	2.04651	110.122	72.6872	58.1246	-0.932421	58.7705	-11.6786	-13.595	0.309783	58.1695	-10.7272	-12.7045	0.342551	15.4453	31.4721	26.2091	0.709654	48.5926	19.5172	16.2623	0.620906	17.062	19.0652	14.2894	0.625523	32.7541	50.1667	37.0053	29.3651	549.403	79.3303	69.6313	-0.96281	27.5628	22.2706	11.8302	4.16657	138.427	166.413	132.917
Tropical diallel	P35×P40	TR0395×18-599	1.51821	252.733	55.6731	45.7131	2.17688	124.729	69.385	60.6707	-0.573171	57.8434	-14.0252	-16.7641	-1.71445	55.8134	-15.3023	-18.0552	-0.265803	15.0152	31.5004	29.6799	-0.299439	49.5971	14.3473	5.01414	1.18609	18.4942	22.827	21.7889	0.219496	33.1604	63.8232	59.6808	44.9336	605.524	104.153	98.9498	-1.88352	27.0731	7.53016	-9.50452	-8.43159	134.417	166.643	138.605
Tropical diallel	P35×P41	TR0395×622016-ZCN-2	-6.41573	238.374	60.3962	57.6009	-4.80715	120.188	64.9514	57.9704	1.82712	59.6976	-11.9134	-15.2953	2.14273	58.6407	-11.6713	-15.1303	-0.18641	15.2224	33.6433	32.1094	-0.674989	44.9985	17.0214	13.865	0.0221315	16.6436	15.0985	11.4868	0.177916	34.4081	58.7252	45.556	2.73293	567.503	86.2143	76.9747	-0.497009	25.0214	41.4745	22.4264	-0.981781	133.372	184.127	170.011
Tropical diallel	P35×P42	TR0395×CML206	8.45575	263.608	59.0293	46.2298	7.74009	135.329	90.8275	87.4595	-4.14838	58.3069	-16.3931	-21.6442	-2.48805	58.6407	-14.2141	-19.704	-0.294487	15.67	23.5039	10.9957	0.150034	46.1224	20.5038	16.7088	0.289605	16.3459	19.4141	9.49265	0.116507	34.8532	61.3748	48.4449	15.5247	570.826	92.2814	87.2215	-0.762503	27.3358	25.1384	17.5682	4.40977	144.18	206.995	191.609
Tropical diallel	P35×P43	TR0395×CML312SR	-9.43494	227.131	53.2774	50.1677	-2.49536	109.088	64.0817	56.6397	-0.150158	58.7705	-11.0207	-12.3267	-1.72226	56.2847	-12.9627	-14.2671	-0.0921222	15.5448	21.9418	9.18309	0.136564	46.6164	18.1903	17.959	0.130129	15.8983	12.9673	6.4944	0.169423	33.6682	49.636	33.1618	8.16064	533.357	71.9352	60.8585	-0.747795	29.251	29.5249	18.2876	-0.570778	137.903	150.907	110.743
Tropical diallel	P35×P44	TR0395×CML312SRQ	3.06187	250.643	59.1425	53.0735	1.1884	122.596	74.0293	72.0678	-0.584783	58.3069	-10.7251	-11.0601	-0.80933	57.6983	-9.74677	-10.0927	0.00390651	15.5801	26.5598	16.5925	-0.826344	44.6648	17.617	13.0206	-0.0784998	15.2717	15.5379	2.29713	0.0777195	31.1966	52.546	47.2595	-4.06785	468.6	68.9929	62.2311	-1.23487	29.2529	20.0732	3.41385	-2.1334	130.241	163.129	138.943
Tropical diallel	P35×P45	TR0395×CML330	0.407909	241.919	63.7472	59.9449	0.303571	115.472	81.9472	65.8064	2.68159	62.2941	-6.38325	-8.41462	3.47481	60.8706	-6.58186	-8.65098	-0.147237	15.1265	24.4808	15.9539	-1.4227	46.4535	17.1535	16.7629	-1.33508	15.0232	5.78477	0.632554	-0.0326568	32.1963	52.8617	43.6804	-35.9279	484.558	63.8485	60.1191	1.34442	31.1881	38.3595	26.5504	-11.8899	126.662	154.271	129.707
Tropical diallel	P35×P46	TR0395×CML504	0.22604	260.018	56.6005	43.7939	1.3328	126.711	73.1847	65.2294	-0.584746	62.0154	-13.2182	-20.3469	-0.662067	60.9968	-12.9599	-20.239	-0.210523	15.5833	21.1829	7.76408	0.976304	47.9694	18.1589	15.102	0.773543	16.883	17.5528	13.0904	-0.544181	33.2281	51.3845	37.4057	14.0534	554.209	79.7073	68.995	1.38785	30.7887	31.2841	16.333	3.61966	145.161	175.08	137.758
Tropical diallel	P35×P47	TR0395×CML85	-10.1988	235.651	44.5456	34.8071	-8.42213	107.623	48.3031	42.5534	-1.56633	56.4527	-15.7844	-18.1861	-1.55293	55.3422	-15.7027	-18.1559	-0.128925	15.166	21.8327	11.201	-0.0758294	45.2737	11.3203	8.25753	1.03818	17.062	14.964	14.2894	-0.652106	32.3139	47.7114	34.4381	17.5113	540.362	72.2202	59.5507	-0.978101	27.2009	24.6452	17.2078	-3.9277	129.823	135.995	98.098
Tropical diallel	P35×P48	TR0395×DTMA227B	-2.98524	246.927	58.5691	54.1439	-3.13203	112.389	72.5206	61.3804	0.197467	55.9891	-9.14093	-13.9499	-0.308692	55.3422	-8.12986	-13.0979	-0.328255	14.9293	22.757	14.2671	-1.07795	44.5191	13.529	12.6519	-1.27412	14.375	6.01001	-3.70887	-1.24446	31.8999	40.1573	23.6254	-59.6061	455.501	49.4852	42.087	1.11309	29.5464	34.7296	26.146	-1.10311	134.991	154.466	119.105
Tropical diallel	P35×P49	TR0395×TR0501	-0.439054	256.048	59.498	50.7796	-4.69121	118.136	58.2802	48.3521	-1.90591	58.7705	-13.595	-17.1887	-1.18433	58.6407	-11.9973	-15.7303	-0.19705	15.3362	25.8962	17.0241	-1.14442	45.8477	8.99336	2.77409	0.302018	15.8983	11.2764	6.4944	-0.182437	31.9753	48.7872	37.4409	1.59673	496.865	64.6209	57.835	-1.3059	30.015	24.7703	8.45719	0.451597	138.469	144.858	101.807
Tropical diallel	P35×P50	TR0395×TR0582	3.60888	248.489	66.3007	64.2887	5.73876	130.287	87.0513	87.0226	-1.72296	59.6976	-12.232	-15.8824	-2.1918	57.6983	-13.4116	-17.0845	0.223098	15.93	25.6967	13.0696	0.293112	46.1736	20.6528	16.8385	-0.32605	15.2717	10.8737	2.29713	1.34629	34.1422	45.4167	25.3326	14.7183	521.301	65.2185	52.3392	-0.773498	28.4662	36.3905	33.6171	-3.26096	134.51	147.671	109.736
Tropical diallel	P35×P51	TR0395×Jiao51	2.09141	268.337	62.7301	50.2928	-2.51641	131.537	60.4341	39.438	0.353898	59.6976	-12.232	-15.8824	0.906683	58.6407	-11.9973	-15.7303	-0.267592	15.6732	32.6135	26.6076	0.893719	47.3954	20.8498	19.9301	1.23171	16.9725	19.1518	13.6899	-1.27561	32.3478	53.0255	43.3782	11.7989	536.778	80.4516	75.3716	0.900191	29.4747	46.7585	44.2159	3.70492	143.811	192.59	167.231
Tropical diallel	P36×P37	TR0403×TR0412	-3.67932	254.19	51.1142	40.5948	1.8695	115.034	83.2829	79.2614	0.379029	67.5781	-7.65889	-7.96825	1.08595	67.1225	-6.51566	-6.83486	0.301937	15.4421	26.6019	24.4601	0.443759	46.5324	13.5405	9.17647	0.042529	13.3919	0.341912	-4.26061	0.746256	33.3635	47.1484	45.9019	10.8139	449.702	48.462	43.3937	0.524397	32.1403	38.6059	21.467	2.68977	133.239	134.86	120.077
Tropical diallel	P36×P38	TR0403×TR0415	7.2538	250.727	52.7731	38.6795	3.16028	114.905	81.5131	79.0599	0.834892	63.8696	-5.41413	-12.432	0.86932	62.4104	-5.64351	-12.7796	-0.511327	14.6332	19.3785	16.8024	-0.198827	45.1507	15.2314	14.7563	0.195744	14.5556	6.00372	4.05876	-1.36313	32.2462	38.8793	36.8064	-17.1622	467.296	48.345	47.6918	-0.149198	29.2834	47.3097	47.0316	-9.84598	123.706	114.554	104.331
Tropical diallel	P36×P39	TR0403×TR0423	-3.93316	239.62	43.0422	32.5362	-2.21411	102.668	68.2141	59.9905	0.301848	65.2603	-7.4024	-10.5253	1.36215	64.2953	-6.94652	-10.1454	-0.596373	14.4406	19.219	17.9993	-0.266077	47.051	15.9741	12.5739	0.270043	14.9136	7.6055	6.61813	-0.128163	32.7879	40.1964	37.1467	6.17411	485.95	52.4562	50.0396	-2.22347	27.6438	24.065	12.1588	-1.34029	131.102	118.551	116.548
Tropical diallel	P36×P40	TR0403×18-599	7.6924	266.69	50.5697	47.5089	6.87866	126.237	78.0477	62.6134	-0.729602	62.9425	-11.6165	-13.7031	-1.60449	60.9968	-12.6532	-14.7551	0.457993	15.6732	33.0148	30.7467	1.42053	50.7512	17.2437	7.45777	-0.149371	15.3612	5.30988	1.15724	1.56501	35.2934	61.7711	54.3416	26.5504	546.878	76.9908	74.3798	1.25832	31.5566	26.6496	5.48221	15.0842	156.114	167.145	157.862
Tropical diallel	P36×P41	TR0403×622016-ZCN-2	-7.93715	244.635	49.7268	35.31	-1.59647	120.205	71.4105	57.9928	-0.647115	62.4789	-12.8694	-14.3387	-1.0458	60.5256	-13.9343	-15.4136	0.259566	15.6026	32.7314	30.1576	1.30588	46.4135	20.9754	17.9658	0.984868	15.8088	13.0018	12.9857	1.22373	36.2414	55.8564	53.3114	54.297	578.804	82.5068	80.4989	0.665033	27.5251	57.9596	38.2031	2.19986	134.735	145.114	122.549
Tropical diallel	P36×P42	TR0403×CML206	8.44303	271.378	50.3207	50.1017	5.24617	129.641	90.1424	79.5809	2.18499	69.8958	-5.12964	-6.07047	1.39161	67.5938	-6.49988	-7.44467	0.233479	16.1322	23.5941	14.2696	0.504733	45.9112	20.2258	16.6892	0.386341	14.6451	10.7969	4.6986	0.175521	35.6997	54.0575	52.0503	15.5485	530.587	71.5704	69.1852	-0.139062	29.3009	35.7547	26.0199	-5.408	132.544	141.023	118.929
Tropical diallel	P36×P43	TR0403×CML312SR	0.88834	245.237	50.4937	35.6429	-3.48128	104.908	64.5667	63.482	-0.30659	63.8696	-8.73857	-12.432	-0.669992	62.4104	-9.02671	-12.7796	0.0121534	15.5833	18.8438	9.45351	0.392933	46.3069	17.6656	17.6363	0.226865	14.1975	4.371	1.49868	0.025237	34.3115	42.517	35.7061	5.82213	490.755	52.1293	48.0101	-0.445353	30.8951	38.4031	24.9362	-2.54924	134.107	112.904	104.942
Tropical diallel	P36×P44	TR0403×CML312SRQ	-6.24165	249.122	44.6131	37.7918	-12.4007	105.813	56.2744	48.5126	0.649485	64.7967	-6.4272	-11.1609	0.243039	63.8241	-5.95438	-10.8039	0.522282	16.0327	26.4891	19.9795	0.196725	45.122	19.0943	14.6833	-0.339864	13.2128	3.6504	-5.54101	1.59253	33.4989	52.0885	46.494	13.8761	446.281	54.0638	42.3029	-1.00832	30.8211	27.8788	8.95771	-1.81637	128.74	123.8	112.646
Tropical diallel	P36×P45	TR0403×CML330	10.3437	259.638	59.7657	43.608	6.29115	118.266	94.7442	84.2973	-0.998446	63.8696	-9.37566	-12.432	0.412383	62.8816	-8.99254	-12.1211	0.083239	15.2912	22.1696	17.2164	1.93617	49.2465	24.4709	23.7832	0.26336	14.8241	7.95913	5.97828	-0.0253724	32.9911	45.7352	44.2732	8.08905	488.312	58.4819	55.7051	2.24887	33.4342	50.0597	35.6643	8.55212	145.286	151.181	139.976
Tropical diallel	P36×P46	TR0403×CML504	-12.1182	255.457	41.2836	41.2716	-8.65852	113.526	61.1909	48.0363	0.185923	68.0416	-9.75552	-12.6068	0.861501	67.5938	-8.6751	-11.6126	-0.388647	15.3394	15.9965	6.07743	-1.77473	44.6525	10.2253	7.1431	-0.741021	13.5709	-2.30872	-2.98093	0.0903339	34.6501	47.292	43.286	-22.9851	476.908	48.672	45.4235	-3.62271	27.1198	16.94	2.47028	-16.1505	123.573	103.252	102.399
Tropical diallel	P36×P47	TR0403×CML85	2.54108	256.174	44.079	41.6921	-0.786448	112.065	60.4736	48.4371	-0.980458	62.2941	-12.2238	-14.592	-1.09796	60.8706	-12.5258	-14.9315	-0.291749	14.9374	16.5808	9.52482	-5.97406	38.8096	-4.36892	-7.1993	0.310811	14.5371	1.15779	-1.46723	-1.14759	32.6059	39.0344	35.6529	-9.29911	473.289	45.1159	39.7462	0.460341	29.981	39.0461	29.1872	-0.957566	130.976	107.771	99.8562
Tropical diallel	P36×P48	TR0403×DTMA227B	10.0933	267.788	57.066	48.1162	4.77455	117.102	87.6345	82.4843	1.89534	62.9425	-3.98904	-13.7031	1.21488	61.9392	-3.48435	-13.4381	0.17652	15.3683	22.6876	17.6271	0.244521	45.2757	15.7155	15.074	-0.101764	13.7499	5.04393	-1.70125	-0.263651	33.6682	38.3509	30.4783	-9.17682	465.667	46.8537	45.2582	1.29263	31.0676	43.3709	32.6406	7.02033	141.296	131.345	129.339
Tropical diallel	P36×P49	TR0403×TR0501	-1.67647	262.594	49.7916	45.2431	1.21707	120.851	68.0779	51.761	-0.208146	65.7238	-8.65753	-9.88977	-0.131961	64.7665	-8.22485	-9.48685	0.0837259	15.5512	23.9503	18.6646	0.669846	47.0961	12.1936	5.57256	0.040654	13.8394	0.163804	-1.06141	0.181278	33.1265	43.6166	42.3892	1.53902	456.544	45.3006	45.0267	-1.32583	31.3367	31.6921	13.2332	-5.12947	131.07	102.963	91.0235
Tropical diallel	P36×P50	TR0403×TR0582	-7.76394	244.899	49.1526	35.456	-9.42315	111.932	67.2681	60.6738	0.43841	67.1145	-6.72474	-7.98306	-0.19703	64.7665	-8.22485	-9.48685	-0.410926	15.2302	16.8133	8.10247	-0.674443	44.6402	16.9122	13.4588	-0.229314	13.5709	2.00987	-2.98093	-0.727791	32.8556	31.1382	20.6096	-18.0031	448.317	36.7214	31.0112	-0.251156	30.3302	47.16	42.3665	-2.22442	133.728	114.524	108.518
Tropical diallel	P36×P51	TR0403×Jiao51	0.304896	274.334	52.6881	51.7367	5.89097	136.751	72.5507	44.9649	-0.729633	63.8696	-11.2345	-12.432	0.0741515	62.8816	-10.8958	-12.1211	-0.554936	15.3201	25.7455	23.7551	0.371087	46.3069	18.3373	17.6949	-0.0142573	13.929	1.12537	-0.420849	-0.607196	33.8037	48.8224	47.827	-10.0074	474.709	53.2076	51.3675	1.41343	31.3296	58.0463	57.3055	4.48555	142.774	149.698	135.827
Tropical diallel	P37×P38	TR0412×TR0415	-2.35057	233.835	54.3141	50.2553	-5.45785	101.246	63.5745	62.1579	0.0197853	62.9425	-7.12544	-14.2813	-0.953967	60.5256	-8.83215	-15.9913	0.25305	15.4774	24.1398	23.5408	0.857546	46.3233	13.4796	8.68587	0.300599	13.7499	5.04433	2.04335	0.110979	31.8061	38.1362	34.9393	10.8318	436.75	43.5262	38.0377	1.17115	33.512	44.7562	26.651	8.1746	136.905	154.25	149.951
Tropical diallel	P37×P39	TR0412×TR0423	-3.23323	233.032	50.4097	49.7397	0.284564	100.126	67.9227	63.1901	0.877342	65.7238	-7.06912	-10.4935	1.42366	64.2953	-7.27664	-10.759	-0.602397	14.5144	17.7871	16.983	-0.808704	46.6246	10.4627	9.39279	-0.341102	13.3919	1.31626	-2.47079	-1.29495	29.7069	28.0833	24.2594	-28.7971	392.439	27.3982	21.1675	-0.325821	32.4497	26.987	22.6363	-10.6799	116.941	108.169	96.7645
Tropical diallel	P37×P40	TR0412×18-599	-0.982873	250.727	52.385	44.5566	-3.37677	110.941	59.6438	42.9093	1.23659	64.7967	-9.32606	-11.7561	0.341826	62.8816	-10.2703	-12.7212	0.33002	15.6251	30.2853	25.9348	0.599103	50.046	11.3987	5.96462	-0.312996	14.287	2.45214	-5.91651	0.364324	32.1785	48.8149	43.1449	-4.34809	457.44	53.359	50.2956	1.49557	34.7021	23.1081	15.9965	3.02222	139.231	154.874	147.151
Tropical diallel	P37×P41	TR0412×622016-ZCN-2	2.62879	247.913	64.3962	59.3017	4.16281	120.923	75.968	58.937	-0.719921	62.2941	-13.4242	-15.1643	-0.639286	60.8706	-13.7455	-15.5124	-0.0127572	15.4101	28.794	24.2022	0.534753	45.7586	14.3843	7.36094	-0.0243773	13.889	4.05097	-0.735198	-0.0369055	33.0665	43.3974	39.8809	-2.57355	463.394	51.221	44.5085	-0.92652	28.8418	39.3508	9.00104	-1.90447	125.809	145.925	137.734
Tropical diallel	P37×P42	TR0412×CML206	-10.3254	245.322	46.0707	36.0861	-10.5246	108.829	62.9842	50.7524	2.76058	70.3594	-4.8182	-5.44746	1.92433	68.065	-6.16739	-6.79946	-1.05964	14.9189	12.4896	5.67537	-0.417094	45.1056	13.2576	5.82885	-0.224904	13.1233	4.3489	3.29512	-1.97316	31.6368	37.6754	34.7458	-39.6238	416.875	39.6346	36.7282	-2.02781	30.3204	21.9864	14.5891	-5.45032	127.68	149.465	141.269
Tropical diallel	P37×P43	TR0412×CML312SR	2.01067	239.071	58.9893	53.6202	2.6368	105.986	70.0115	67.3669	0.269004	64.3332	-8.39813	-12.3873	-0.60848	62.4104	-9.35176	-13.3752	-0.51707	15.1339	13.5981	6.29702	-0.945094	45.0851	9.98278	5.78075	0.42132	13.4814	4.01258	1.99299	-0.430549	31.9415	33.749	26.3325	4.49206	430.886	38.1554	29.9536	-1.88081	32.3679	26.4647	22.3272	-7.16827	124.666	110.661	90.5147
Tropical diallel	P37×P44	TR0412×CML312SRQ	4.29818	252.374	58.0474	54.131	0.482158	113.655	71.4207	59.5191	0.297979	64.3332	-7.42541	-12.3873	-0.166749	63.3528	-6.98601	-12.0672	0.018779	15.609	21.1404	16.8089	-0.231102	44.8104	13.3699	5.13623	-0.772009	11.8701	-1.94755	-6.569	-0.115952	29.8762	36.8445	32.9032	-18.9005	354.964	27.2427	21.4796	1.27902	36.0167	31.5743	27.325	-2.46159	123.273	129.5	126.16
Tropical diallel	P37×P45	TR0412×CML330	1.79512	243.801	62.6144	56.6595	-1.96067	104.973	76.9583	71.0908	-1.35005	63.406	-10.3464	-13.6501	-0.468505	61.9392	-10.6745	-14.0292	0.244216	15.532	22.0468	19.0623	0.0426395	47.4692	15.2085	11.3744	-0.347785	13.3024	1.62559	-1.27773	0.399071	31.5013	40.3553	40.1324	-2.68992	418.993	40.8797	38.4537	2.17281	36.2664	41.9292	37.0607	2.6147	134.527	148.984	143.971
Tropical diallel	P37×P46	TR0412×CML504	-4.83015	255.457	51.8535	41.2716	-5.64284	111.501	61.5449	45.3955	-0.165583	67.5781	-10.6618	-13.2021	0.451714	67.1225	-9.61229	-12.2289	-0.0824904	15.7254	17.0573	8.74662	-1.28205	45.2614	7.38575	6.19439	-0.725566	12.6758	-4.33372	-8.11555	-0.678652	31.9669	37.0143	32.1904	-34.1306	407.223	31.3315	24.1744	-2.26539	31.3853	18.6007	18.5875	-10.4514	124.451	118.383	103.836
Tropical diallel	P37×P47	TR0412×CML85	11.0549	257.4	55.7964	47.2489	3.21643	111.027	62.2587	47.0622	1.17064	64.3332	-9.66374	-12.3873	0.974551	62.8816	-9.95424	-12.7212	0.0207278	15.3297	17.7141	12.4013	1.48081	46.3807	9.85267	8.82054	0.344666	13.6604	-0.500526	-7.40953	0.0345226	31.8738	37.0446	32.6071	11.2361	435.284	37.9931	28.5248	-1.0403	31.3886	26.3949	18.6261	7.50571	134.617	127.288	105.413
Tropical diallel	P37×P48	TR0412×DTMA227B	-7.66163	242.745	53.7253	51.5338	-3.67117	103.616	69.8568	68.8786	-2.16467	58.7705	-10.688	-19.9629	-1.07971	59.5831	-7.51024	-17.2994	0.257197	15.5288	21.9258	18.8556	-0.525605	44.6218	9.46127	4.69373	0.00319147	12.9443	3.98643	1.88618	1.54906	33.5667	39.0405	30.085	21.8309	438.135	42.9993	36.67	0.540775	33.224	33.2091	25.5626	2.432	131.887	130.308	114.066
Tropical diallel	P37×P49	TR0412×TR0501	4.64016	261.623	60.7803	54.0622	8.36925	122.962	74.43	54.4123	1.29455	67.1145	-7.04256	-8.59961	1.81435	66.6513	-5.88214	-7.48888	-0.243197	15.3041	19.9736	16.7791	-0.83008	45.7124	4.80716	2.4708	-0.480991	12.4072	-5.82892	-9.07593	-0.613109	30.4179	32.9906	30.7467	-20.0735	376.392	24.0169	19.5654	0.493284	36.0641	33.2386	30.3152	-3.29599	128.082	110.774	86.6686
Tropical diallel	P37×P50	TR0412×TR0582	7.20239	252.578	66.5989	62.2989	0.923321	117.237	78.9622	68.2898	-0.962996	65.6011	-9.1387	-10.6606	-0.303217	64.5988	-8.78046	-10.3377	-0.125129	15.5958	17.7223	10.6976	0.724551	46.1554	15.9076	8.29198	0.909741	13.7994	8.98352	8.6168	0.392123	32.0613	28.965	17.6938	33.5481	441.329	39.1329	28.9689	0.00599096	33.4956	40.2534	26.589	-0.453347	130.678	123.28	103.761
Tropical diallel	P37×P51	TR0412×Jiao51	-1.39267	265.349	58.8114	48.6188	-0.861254	124.957	60.5221	32.4634	-0.15404	64.3332	-10.8948	-12.3873	-0.335536	62.4104	-11.8707	-13.3752	0.260341	16.2152	30.8382	30.6911	0.0826608	46.1347	13.1599	8.24337	-0.278002	12.7547	-2.87605	-5.93962	-0.955182	31.5415	40.0573	39.8043	-20.9737	405.203	35.4557	32.3845	1.29998	34.1244	47.7573	28.9655	3.76523	137.232	157.144	155.005
Tropical diallel	P38×P39	TR0415×TR0423	3.12618	224.996	49.1634	45.8752	4.05045	102.471	70.3125	64.1207	0.869704	61.5518	-5.40057	-9.50596	-0.206667	58.1695	-8.65829	-12.7045	-0.42826	14.6929	18.6536	17.2789	-1.32389	45.3703	12.2804	8.55263	-0.368407	14.375	5.67685	4.68943	-1.93684	30.0571	26.6153	25.7242	-51.5715	415.235	29.704	28.206	-2.83372	27.7585	24.7903	12.6242	-8.54227	122.082	113.795	105.414
Tropical diallel	P38×P40	TR0415×18-599	-1.40996	235.904	47.0338	36.0103	-2.17219	110.725	58.1036	42.6317	0.765354	60.1611	-8.57478	-13.4289	1.0676	59.1119	-8.24168	-13.2124	0.232587	15.532	28.8597	23.9766	-0.385784	48.322	12.0519	2.31432	0.198299	15.8088	10.3195	4.1048	-0.323067	32.4832	46.5275	37.8119	1.5613	508.92	63.9668	60.8473	0.773372	31.7966	27.8057	6.28444	4.62837	143.84	158.921	155.332
Tropical diallel	P38×P41	TR0415×622016-ZCN-2	2.1862	233.075	58.8687	58.0827	2.32229	117.662	69.8864	54.6514	-1.46986	57.3798	-13.4486	-18.584	-0.729717	56.2847	-13.2925	-18.5401	0.0373796	15.4646	28.5998	23.4386	-0.963734	43.521	13.9179	11.534	-0.0102623	14.9136	8.59511	6.58765	-0.291846	33.8037	43.2064	42.9993	-6.03916	505.499	58.6953	57.6388	-1.72212	25.8629	48.7416	30.3494	-5.31692	125.4	140.766	128.946
Tropical diallel	P38×P42	TR0415×CML206	-8.64093	232.61	41.9618	29.0347	-6.00217	111.932	66.2837	55.0497	-0.491958	62.9425	-7.79475	-15.4147	-2.5333	59.1119	-11.6165	-19.0588	-0.181307	15.8016	18.6046	11.9278	-0.35248	44.4311	16.8464	13.8664	-0.161189	14.1975	9.5375	5.36518	-0.358256	34.2438	45.5648	45.2814	-10.3366	491.733	58.2934	55.4152	0.16849	30.3334	40.7837	30.4606	2.18463	138.318	165.446	152.531
Tropical diallel	P38×P43	TR0415×CML312SR	-5.30002	217.365	48.5988	47.4274	1.81638	103.745	64.9865	63.8288	-1.59293	58.3069	-9.7049	-13.0183	-0.825111	57.6983	-8.69279	-12.1139	0.435167	16.0905	20.233	13.016	0.14452	45.4356	15.9296	15.4229	-0.0520648	14.0185	5.03687	4.03674	0.81196	34.1761	39.9102	35.1706	10.483	482.447	48.9107	45.5043	0.290899	32.3563	45.1935	30.8451	5.69428	140.531	133.812	114.76
Tropical diallel	P38×P44	TR0415×CML312SRQ	-5.4197	228.26	46.7069	39.404	1.29904	113.052	69.1317	58.6725	-1.10036	58.7705	-7.93484	-10.3529	-1.32578	57.6983	-7.6139	-10.0927	0.524796	16.1194	24.5172	20.6283	0.071312	44.3737	17.623	13.7193	0.0973065	13.7499	10.0801	2.04335	0.754057	31.7383	41.8299	34.6516	15.7674	435.203	49.5205	37.5485	-0.510072	32.0443	33.1617	13.2819	-5.85054	122.887	124.904	124.358
Tropical diallel	P38×P45	TR0415×CML330	-13.286	214.324	46.9657	45.3651	-1.72559	103.788	73.3804	66.2296	-1.82119	58.7705	-9.67517	-13.595	-0.213936	57.6983	-9.3982	-13.4117	0.0440528	15.3362	19.9385	17.5614	-0.366247	46.3212	17.5593	16.4304	-0.19457	14.4661	7.35857	7.35857	0.727481	32.8218	42.7688	39.2485	5.74457	472.998	52.8209	49.494	0.340918	32.2512	44.9948	30.8641	2.67005	137.585	150.352	149.517
Tropical diallel	P38×P46	TR0415×CML504	0.232865	246.124	49.9543	36.1104	-0.948061	114.776	64.9968	49.6656	-1.10042	62.4789	-10.7258	-19.7515	-1.17852	60.9968	-11.0873	-20.239	0.281467	16.0937	19.2623	11.2937	1.19746	47.0018	16.4911	12.7802	1.03885	15.4507	13.3168	11.9992	2.19746	35.8351	50.0848	48.1862	73.6389	560.563	73.995	70.9324	0.437442	31.9049	37.7967	20.5505	6.47022	144.375	149.295	136.47
Tropical diallel	P38×P47	TR0415×CML85	-1.07007	230.879	43.2942	32.0772	-2.30069	104.09	50.9278	37.8735	-2.082	56.9162	-13.1815	-17.5144	-1.12688	56.2847	-12.2954	-16.7621	-0.850235	14.4631	10.5465	6.04713	0.575826	44.7366	10.6783	6.97322	-0.218219	14.108	-0.0429902	-4.37568	-0.619068	32.2123	35.326	34.0154	-16.1698	453.449	38.4414	33.8882	0.821993	31.0676	44.3373	33.8693	-3.25684	126.858	110.889	93.5725
Tropical diallel	P38×P48	TR0415×DTMA227B	0.990984	237.002	54.0822	47.9485	-3.93159	101.935	65.6338	63.2621	0.145392	56.9162	-5.36996	-8.36804	0.117358	56.2847	-4.21858	-7.32221	0.670134	15.9461	24.6109	22.0495	-0.0632911	44.345	13.8088	13.6458	-0.201694	13.7499	7.14473	2.04335	2.11437	35.1241	42.2767	36.1205	29.6138	491.489	54.3188	53.3129	-0.25532	30.2446	39.8155	29.1269	1.06015	133.518	129.445	116.713
Tropical diallel	P38×P49	TR0415×TR0501	-5.96443	236.622	49.1685	39.34	-0.454873	112.718	58.6808	41.548	2.21401	63.8696	-4.01549	-10.0038	1.59772	61.9392	-4.94181	-10.9901	-0.42416	15.1275	18.0299	15.4316	-0.783866	45.0195	7.66282	0.917566	-0.059276	13.8394	2.05959	1.41974	-1.0296	30.9935	32.3506	31.4918	-17.0151	425.021	34.6708	34.3304	-1.25431	32.1332	35.2529	16.1112	-6.34174	128.039	107.54	86.6061
Tropical diallel	P38×P50	TR0415×TR0582	3.4046	234.384	58.8882	58.8059	2.1222	117.016	77.1622	67.9723	-0.384333	62.0154	-6.80201	-12.6165	0.119051	60.5256	-7.11126	-13.0216	-1.27511	14.4502	8.57938	2.5661	-0.166355	44.5254	17.1092	14.1081	0.118356	14.0185	7.44727	4.03674	-3.08987	29.5714	16.3955	8.55366	-48.1239	405.227	23.0577	18.419	-0.00780404	31.2985	52.1357	46.9116	-2.6651	131.469	121.132	104.995
Tropical diallel	P38×P51	TR0415×Jiao51	10.6288	262.974	61.3429	47.2889	2.74323	127.142	62.2016	34.779	-1.08888	59.234	-10.982	-16.5356	-1.02337	57.2271	-12.1735	-17.7617	0.689878	16.6491	33.6873	32.8933	-0.195025	45.1179	15.7789	15.6265	-0.472287	13.5709	0.396213	0.0795153	1.73693	35.2257	52.7175	49.4471	14.2841	486.031	56.1596	53.6131	1.36948	32.0106	61.7886	61.334	3.62538	140.095	158.031	155.776
Tropical diallel	P39×P40	TR0423×18-599	-3.39062	234.004	42.8227	34.9147	-2.37587	103.659	52.9716	33.5291	-3.01259	58.3069	-15.1966	-16.0971	-1.26687	58.1695	-13.6606	-14.596	-0.0803604	15.1115	26.8992	23.4815	-0.0573336	50.618	13.7168	7.17574	-0.533002	15.3612	6.24474	1.15724	0.268605	32.3816	44.9689	35.4472	-8.90651	493.769	57.191	52.4539	2.9128	34.3707	25.9842	14.8887	4.72126	142.824	146.745	140.314
Tropical diallel	P39×P41	TR0423×622016-ZCN-2	2.48594	233.455	55.5234	51.3595	-0.509798	107.968	61.1708	41.9089	0.778398	61.5518	-11.1132	-12.6644	-0.236986	58.1695	-14.2866	-15.8123	0.908833	16.2285	36.601	32.6089	-0.692784	45.7595	15.5792	9.48383	-0.293964	14.9136	7.58997	6.58765	1.41713	34.8194	46.4654	45.6441	16.6454	523.501	62.4391	61.6336	-1.39018	26.6295	34.5556	8.04351	-8.46913	121.139	122.626	103.827
Tropical diallel	P39×P42	TR0423×CML206	-7.41199	233.919	39.8588	29.761	-4.65476	106.416	63.6073	47.4098	-0.0979022	65.2603	-8.36192	-12.2999	0.786826	63.8241	-8.6046	-12.6065	0.603546	16.4789	25.0508	16.7254	0.91487	47.666	20.9402	14.0453	-0.53439	14.108	7.7801	2.74436	1.68932	35.5981	50.2472	48.9013	12.5923	509.979	62.2136	57.4587	0.746231	31.3458	30.8856	27.179	7.55012	142.574	161.905	139.895
Tropical diallel	P39×P43	TR0423×CML312SR	4.20613	226.951	51.628	47.143	-1.18811	93.8779	54.8858	48.2471	-0.735277	61.0883	-9.53301	-10.1874	-1.74598	58.1695	-12.0552	-12.7045	-0.30148	15.2463	15.174	7.08649	0.65947	47.9181	18.0828	14.6485	-0.067246	14.287	6.02954	4.04812	0.252482	32.9233	33.8597	30.2158	3.51764	470.799	43.6567	41.9913	1.23183	33.7319	36.6336	36.4079	4.18907	137.917	120.9	110.765
Tropical diallel	P39×P44	TR0423×CML312SRQ	-0.17886	233.581	46.9164	42.6538	0.405852	105.296	63.066	47.7868	0.220798	62.0154	-7.14529	-8.82437	0.109451	60.5256	-7.46063	-9.16872	0.073849	15.5609	21.566	16.4488	0.756462	47.0264	20.2321	12.515	0.261205	14.1975	12.5079	3.39617	0.499329	30.7903	36.5667	28.791	16.1331	430.886	46.1588	33.0383	0.284259	33.2733	25.7157	17.6267	1.18995	128.818	126.118	116.749
Tropical diallel	P39×P45	TR0423×CML330	8.63598	236.326	58.3609	53.2214	4.18922	102.84	78.568	77.6267	0.427067	62.9425	-7.46134	-7.46134	-0.663605	58.6407	-11.9974	-11.9974	0.135506	15.3201	21.1883	17.438	1.4115	50.0665	22.7419	19.7887	0.416829	15.3612	12.9262	11.8711	0.608153	32.0092	38.2226	33.8895	22.1571	484.728	54.7404	49.6623	1.72805	34.073	38.2501	38.244	4.11083	137.917	140.75	132.058
Tropical diallel	P39×P46	TR0423×CML504	-13.3613	232.61	38.8446	28.637	-11.6222	97.2387	44.5017	26.7978	2.07504	67.5781	-7.34751	-13.2021	0.256714	63.8241	-10.8039	-16.542	-0.19198	15.5127	16.2068	7.27586	-0.57529	47.1966	13.0847	12.9222	0.128548	14.8241	7.70773	7.4571	-1.44307	31.5013	31.0107	30.265	-21.0539	461.187	41.5064	40.6298	0.891872	32.794	28.3196	23.9099	9.85901	146.655	143.438	140.204
Tropical diallel	P39×P47	TR0423×CML85	1.97467	234.004	42.2323	33.8649	-1.16878	98.359	47.4721	30.2827	-0.297246	60.6247	-11.509	-12.1399	0.308251	59.1119	-11.9404	-12.581	0.0309178	15.2367	17.766	11.7194	-0.545124	45.5832	9.02979	8.9976	-0.14382	14.4661	1.5709	-1.94847	-0.264296	31.8738	32.9642	32.6071	-7.9029	457.033	37.96	34.9464	-0.909177	29.7711	24.4236	20.7899	-5.36455	123.641	97.8776	88.6641
Tropical diallel	P39×P48	TR0423×DTMA227B	3.44463	239.536	52.3617	49.5303	2.97422	101.978	72.0497	68.1466	0.0759478	58.7705	-6.85811	-13.595	1.08129	58.6407	-4.98221	-11.9974	0.440607	15.609	23.3762	19.4696	-0.587641	45.7882	13.4716	9.55249	-0.0377948	14.1975	9.5375	3.39617	0.539144	32.8556	32.1868	27.3292	9.7786	466.97	44.9184	44.1796	1.52351	32.4581	35.0468	31.6918	5.04084	136.389	125.358	121.374
Tropical diallel	P39×P49	TR0423×TR0501	-5.74909	236.918	46.2208	39.5141	-7.30506	99.0053	43.977	24.3277	0.290267	63.8696	-8.09252	-10.0038	-0.265549	61.468	-9.75326	-11.6673	-0.0245072	15.4196	21.6871	17.6604	0.665884	48.4368	12.1146	8.57793	-0.163877	14.0185	2.4114	2.09256	0.645473	31.9753	35.5692	33.7477	8.11313	445.466	39.4957	37.5401	0.64382	34.466	31.7469	24.5406	-7.95015	125.321	95.7433	82.6457
Tropical diallel	P39×P50	TR0423×TR0582	-14.105	216.954	43.7594	40.6617	-4.72699	103.304	61.9687	48.2893	-0.453877	63.8696	-8.09252	-10.0038	-1.27302	60.5256	-11.1369	-13.0216	-0.570259	15.0475	14.3143	6.80568	-0.173705	46.4856	17.9596	11.2211	0.353255	14.5371	10.3371	5.86938	-2.73	29.238	14.326	7.32978	-44.7023	403.966	21.2967	18.0504	-1.02887	30.7121	33.6723	24.6078	-6.65401	126.371	104.542	97.0461
Tropical diallel	P39×P51	TR0423×Jiao51	12.7446	265.17	59.3658	48.5188	9.47674	127.013	66.869	34.642	-0.231221	62.0154	-10.7607	-12.6165	-0.530636	59.1119	-13.2125	-15.0531	-0.0789391	15.7727	28.1438	27.4114	1.16042	48.4409	20.032	15.8993	0.765811	15.0927	10.6046	9.91566	0.398699	33.1942	42.868	38.8462	32.4072	499.471	58.5721	54.2144	-0.488185	30.5876	37.8543	24.1027	5.26607	140.627	148.353	136.618
Tropical diallel	P40×P41	18-599×622016-ZCN-2	-1.2499	245.163	53.5027	41.3487	-3.26633	119.688	55.7292	54.1767	-0.253052	59.234	-15.3622	-15.9531	0.566076	58.6407	-14.5217	-15.1303	-0.502021	14.9959	29.8277	29.5132	-0.0331773	48.4327	14.4761	2.54871	0.629323	16.7039	14.4992	9.99927	-0.851101	33.3635	50.2666	41.1371	4.43949	551.847	76.5828	72.0924	-2.3861	26.0646	16.2277	-12.8756	-2.84476	135.35	156.032	140.262
Tropical diallel	P40×P42	18-599×CML206	-1.19203	255.584	44.5139	41.7787	-0.689492	124.858	66.6765	60.8373	-1.12935	62.9425	-12.523	-15.4147	0.176189	62.8816	-10.8958	-13.897	0.303292	16.3569	27.3092	15.8612	0.647876	49.4126	17.2874	4.62349	-0.685304	14.8241	7.29067	-2.3797	0.944689	35.6658	61.2176	51.9059	-1.81285	536.126	75.9944	75.8405	2.07931	33.1099	24.5494	10.6743	0.987349	144.599	173.403	156.68
Tropical diallel	P40×P43	18-599×CML312SR	14.2269	252.416	58.4735	45.5305	2.64776	112.19	59.1854	44.5189	-0.839627	59.6976	-12.5482	-14.0959	0.470783	60.0544	-10.2072	-11.8286	0.980767	16.7068	29.4296	17.3447	0.191576	49.4638	14.2438	4.7319	-0.39718	14.8241	4.38245	-2.3797	2.18261	35.6658	54.8992	41.0626	26.5006	534.334	68.0483	61.1533	1.03812	33.9692	24.3263	13.5467	12.7854	155.101	154.742	137.025
Tropical diallel	P40×P44	18-599×CML312SRQ	1.2269	250.432	48.5422	44.3862	0.600921	119.968	61.1616	54.5375	-1.27425	59.234	-12.279	-14.763	-1.44359	58.6407	-11.3427	-13.9042	0.457295	16.1226	29.2831	20.6522	-1.25093	47.0326	12.4384	-0.415787	-0.695309	14.108	5.70747	-7.0954	1.1768	32.2801	53.8927	52.3741	-1.61169	453.693	59.1648	49.0645	-0.367853	33.0522	13.5742	10.4815	0.836181	137.052	147.294	143.283
Tropical diallel	P40×P45	18-599×CML330	-15.1702	227.965	43.5217	31.4329	-4.81511	108.312	60.562	39.5235	-2.45858	58.7705	-14.5224	-15.43	-1.74534	57.2271	-15.0594	-15.9796	-0.424748	14.9381	21.3299	14.5097	0.45781	51.1264	17.5138	8.2522	0.624015	16.4354	14.6921	8.23113	-0.881374	31.332	45.1397	39.8234	-0.88238	502.241	65.4874	65.0151	-0.592263	32.1837	17.9726	7.57838	-7.14861	135.245	142.646	140.075
Tropical diallel	P40×P46	18-599×CML504	-3.04484	258.371	45.86	42.8831	-2.31408	121.023	56.8491	55.8973	0.579985	64.7967	-12.0507	-16.7745	-0.353924	62.8816	-13.0181	-17.7744	-1.33323	14.5497	11.7521	0.616365	-0.559484	49.226	10.739	4.2284	-0.827966	14.7346	1.68513	-2.96908	-2.9325	30.8242	37.1514	27.465	-75.4538	447.34	41.495	36.4072	0.44146	32.7746	16.258	9.55354	-5.86166	139.522	137.709	128.521
Tropical diallel	P40×P47	18-599×CML85	-0.547073	246.926	41.8092	41.2575	0.900589	114.905	50.0781	48.0157	1.9162	61.5518	-11.1131	-11.4277	1.11131	59.5831	-12.2035	-12.5206	-0.208336	15.1757	20.3607	11.2721	1.33418	49.4761	11.1206	4.75794	0.689866	16.1668	7.99815	6.46233	0.209977	33.1604	48.0278	37.9598	27.6242	533.112	65.8106	57.4101	-1.58279	29.5285	11.1684	-1.297	-4.79422	132.799	117.936	102.638
Tropical diallel	P40×P48	18-599×DTMA227B	-1.70602	249.83	49.761	44.0392	-3.10011	110.381	59.6495	42.1877	1.8258	59.234	-7.20869	-14.763	0.470751	57.6983	-7.61383	-15.2878	0.390753	15.7374	27.7184	20.4523	1.52537	49.9148	15.8956	5.68682	0.728891	15.8312	15.6536	4.25231	0.700218	33.829	45.2813	31.1015	36.0605	533.805	70.8341	66.5128	-0.392701	30.9729	16.1362	3.53111	4.10197	144.038	144.246	133.789
Tropical diallel	P40×P49	18-599×TR0501	-8.69903	249.412	45.3188	43.7984	-3.85469	116.932	48.7094	46.8398	-0.741183	61.5518	-12.3584	-13.2697	-0.404886	60.9968	-11.4049	-12.3444	-0.366861	15.2555	23.6072	16.4083	0.79409	50.5786	10.1461	7.09232	0.784009	15.8334	9.83545	4.2668	-1.77795	30.3642	37.9205	30.5158	-23.779	454.126	46.6911	44.2587	0.565608	34.8188	20.9175	16.3866	-3.76612	138.093	121.039	101.259
Tropical diallel	P40×P50	18-599×TR0582	7.8974	254.401	58.4872	46.6749	6.52998	129.038	75.211	66.2211	2.22317	65.2603	-7.078	-8.04421	1.88605	63.3528	-7.9829	-8.95872	0.0151871	15.8112	23.2009	12.2264	1.0226	49.6955	17.9723	5.22249	0.131341	15.1822	9.20627	-0.0215183	-0.263223	32.5171	35.4655	19.367	-1.5604	487.66	50.8481	42.5083	1.41391	33.5859	31.1416	12.2654	2.87902	144.492	139.885	125.301
Tropical diallel	P40×P51	18-599×Jiao51	7.31074	275.181	56.3576	54.1256	8.36821	140.381	63.2677	48.813	1.33383	62.2941	-11.3015	-12.2238	1.55993	60.8706	-11.5882	-12.5258	-0.147023	15.8829	32.5893	28.3014	-2.14567	47.1484	9.46079	-0.170599	-0.170702	15.0232	4.52528	-1.06857	-0.643648	32.9642	52.1616	46.1102	-14.8132	492.803	61.4582	61.0046	-4.5421	26.9647	8.62739	-9.86686	-10.5182	133.43	142.27	136.854
Tropical diallel	P41×P42	622016-ZCN-2×CML206	7.47183	257.822	58.0523	43.0204	6.21788	134.208	81.0284	76.3987	-0.119765	63.406	-12.4773	-14.7918	-0.678724	60.9968	-14.165	-16.4779	-0.171115	16.0103	24.8842	13.4061	-0.559474	43.9822	18.2042	17.6395	-0.0881648	14.7346	11.4572	5.30833	-0.31069	35.6997	51.5333	51.0199	-8.02861	534.09	70.755	66.5548	-0.680078	26.9123	40.9559	15.7468	-1.84024	133.277	169.688	169.557
Tropical diallel	P41×P43	622016-ZCN-2×CML312SR	-5.15066	226.613	55.6978	55.2363	-5.05167	106.934	53.4113	40.5497	0.63356	60.6247	-11.8256	-13.9798	0.55817	59.1119	-12.2619	-14.4484	0.25276	16.1066	25.0515	13.129	0.417226	45.4664	18.4765	15.5011	-0.247621	14.287	5.01366	2.10946	-0.867274	33.9052	38.6071	34.0992	-26.4707	485.542	48.885	46.4378	-0.82167	28.6712	44.5736	15.943	-0.432981	133.388	132.32	103.843
Tropical diallel	P41×P44	622016-ZCN-2×CML312SRQ	-9.59585	233.183	50.577	42.4106	-1.7733	120.036	62.9477	57.7714	0.198935	60.1611	-11.5505	-14.6376	0.0575015	59.1119	-11.2902	-14.4484	-0.0837516	15.7094	26.2534	17.5598	0.885918	44.9464	21.7769	20.2185	0.42043	14.5371	14.0213	3.89679	-0.185577	32.207	43.7048	36.2448	2.88765	462.372	57.6982	44.1897	0.60076	30.5826	41.5153	8.11457	1.98699	129.708	149.675	137.966
Tropical diallel	P41×P45	622016-ZCN-2×CML330	0.799589	237.509	63.6826	62.7001	2.09226	117.662	76.4468	54.6514	-0.058296	60.6247	-12.452	-13.9798	-0.715455	57.2271	-15.6752	-17.1762	-0.266855	15.2238	23.9328	16.6998	-1.53884	44.9067	16.3812	12.8749	0.325954	15.4507	12.5061	10.4263	0.741146	34.2438	48.733	44.861	22.8775	530.18	70.1224	65.3355	-4.19675	25.141	27.0414	2.01334	-9.75692	124.142	137.512	125.137
Tropical diallel	P41×P46	622016-ZCN-2×CML504	-1.30698	253.683	55.2499	40.2908	5.3366	131.117	71.6521	70.9743	-1.19173	62.4789	-15.7592	-19.7515	-0.737636	61.468	-15.5482	-19.6229	-0.029341	15.9814	23.0136	10.5171	-0.383034	45.1794	14.2873	8.40739	0.395773	15.2717	9.91884	9.147	1.26312	36.3091	51.8525	50.1463	35.6264	562.599	73.4776	71.5533	-1.67393	27.221	31.5011	2.85266	3.08516	139.974	153.463	129.261
Tropical diallel	P41×P47	622016-ZCN-2×CML85	-7.42602	233.622	45.6561	33.6465	-3.75464	112.692	48.6913	48.1189	-1.70971	57.3798	-17.7225	-18.584	-1.1572	56.2847	-17.6607	-18.5401	0.249517	15.7614	25.2844	15.5663	0.881633	44.8005	13.1217	7.12602	-0.415215	14.375	0.0164364	-2.5654	0.936298	35.176	47.5647	46.3455	6.5755	516.243	56.5924	52.4292	3.61982	31.2929	64.0872	34.8401	11.2154	140.313	144.173	114.105
Tropical diallel	P41×P48	622016-ZCN-2×DTMA227B	9.92444	255.035	66.5958	59.2053	9.02096	124.944	82.7596	64.2225	0.517685	57.3798	-10.8008	-18.584	0.087039	56.2847	-10.5817	-18.5401	-0.956873	14.5176	18.0877	11.116	-1.30138	42.865	12.3652	10.1685	-0.30767	14.108	7.76322	0.830001	-1.05456	33.3635	34.9581	29.2975	-29.3328	472.591	47.3972	47.3765	-1.84979	26.0776	35.9738	11.3362	-6.48581	124.955	125.134	102.816
Tropical diallel	P41×P49	622016-ZCN-2×TR0501	6.82753	258.513	63.7217	52.2311	-3.29072	119.939	54.0493	50.6155	0.547204	62.2941	-11.9185	-12.2238	0.498801	60.8706	-12.2155	-12.5258	0.345432	16.0956	30.7112	22.8187	-0.49776	45.0637	9.91489	1.01665	-1.28395	13.0788	-5.35482	-6.52572	0.198166	33.6296	43.3981	42.2628	-31.6089	450.476	41.7775	40.48	3.77482	34.5898	62.3595	24.9879	7.00509	140.369	137.895	104.577
Tropical diallel	P41×P50	622016-ZCN-2×TR0582	5.37916	245.457	67.2219	66.3088	5.41276	130.363	78.8906	71.3449	-2.07474	60.4163	-14.5737	-14.8697	-1.18477	59.2521	-14.5496	-14.8516	0.96058	16.8844	31.8515	19.8438	0.454951	44.9048	20.6993	20.1072	0.35778	14.722	10.6459	5.21828	2.1489	36.2185	42.3673	32.9545	50.5201	543.92	64.1114	58.9491	1.84123	30.575	68.7422	43.5156	17.8534	150.971	165.964	135.404
Tropical diallel	P41×P51	622016-ZCN-2×Jiao51	-2.5667	258.878	59.5437	44.9945	-5.93442	128.521	50.8318	36.2407	2.06472	62.4789	-11.6572	-11.9634	1.30231	59.5831	-14.0723	-14.376	-0.83763	15.3201	28.1913	23.7551	1.20308	46.2741	21.2873	18.9025	0.0483365	14.5556	5.65919	4.02901	-3.26031	31.6368	36.9551	33.8327	-53.867	457.929	46.1282	42.8042	2.43542	30.504	75.9976	54.6095	-8.12689	127.327	146.732	136.598
Tropical diallel	P42×P43	CML206×CML312SR	5.18001	247.306	52.0092	37.1872	3.68677	118.266	74.5412	63.8237	0.68436	65.2603	-7.72443	-12.2999	1.11078	64.2953	-7.27657	-11.9613	0.383973	16.7935	18.4516	17.9537	0.86865	46.2167	20.9947	17.4071	0.675633	14.6451	14.1205	10.7969	1.06402	36.343	49.0611	43.741	38.2247	540.769	69.9296	63.094	0.284836	32.3576	34.8803	30.8503	7.46937	146.707	155.41	124.197
Tropical diallel	P42×P44	CML206×CML312SRQ	-1.99217	251.149	46.0131	39.319	-5.96527	118.438	65.14	64.0624	0.713335	65.2603	-6.75144	-12.2999	0.610114	64.2953	-6.27916	-11.9613	-0.498998	15.8498	15.3529	12.2692	-0.832228	43.5271	18.5049	17.5453	-0.428196	13.1233	9.56568	5.42441	-1.87179	31.0273	38.9376	32.1499	-44.7071	405.309	42.0577	32.9345	1.23497	33.7967	31.152	19.477	-7.54446	125.593	141.642	130.417
Tropical diallel	P42×P45	CML206×CML330	-0.356635	246.715	52.0603	36.8592	-2.4404	115.724	78.755	60.3022	-0.00749596	65.2603	-8.36192	-12.2999	0.308258	62.8816	-9.95425	-13.897	-0.203042	15.8433	16.6538	12.2232	0.636713	47.3811	23.3649	19.0945	0.354028	14.9136	15.0624	10.6796	-2.44016	31.569	37.5941	34.457	-32.5741	465.26	53.1677	52.5975	1.36346	33.2811	38.9729	35.0431	4.70793	144.023	175.423	161.193
Tropical diallel	P42×P46	CML206×CML504	9.8683	275.221	52.4364	52.2015	12.9009	141.275	89.785	84.2203	1.17687	69.4323	-8.8036	-10.8205	0.757376	67.5938	-9.57665	-11.6126	0.888372	17.4548	22.1545	20.7062	1.37832	47.2396	20.0412	13.3508	0.334346	14.6451	11.6097	6.15956	2.04321	37.5957	57.7618	55.4667	46.9685	564.473	78.3942	72.1246	0.799678	32.2745	29.8328	21.947	8.9028	151.208	173.687	147.662
Tropical diallel	P42×P47	CML206×CML85	12.2817	263.692	48.5274	46.2767	8.0581	127.099	72.1187	68.3505	2.04949	65.7238	-8.34422	-11.677	1.75141	63.8241	-9.24393	-12.6065	0.47237	16.5399	19.1806	17.1574	0.137586	44.3553	12.5049	6.06147	0.061899	14.287	5.04531	-3.16228	1.32589	36.0721	51.8341	50.0736	24.1162	524.315	62.9394	54.8126	-0.75297	29.5	26.9953	26.8762	4.32304	138.838	141.504	111.853
Tropical diallel	P42×P48	CML206×DTMA227B	-6.39259	249.08	46.3191	38.1711	-9.6016	108.916	63.9809	50.8716	-1.28581	60.1611	-9.25321	-19.1524	-1.71655	59.1119	-8.93707	-19.0588	-0.53346	15.4967	14.0178	9.76812	-0.0197311	44.4455	17.0563	14.2306	0.168004	14.0185	13.7887	12.6159	-0.850071	34.0745	38.2822	32.0529	-10.3339	482.121	54.1623	50.3908	-0.0395828	30.4677	30.557	30.0794	-3.94857	132.909	139.361	115.726
Tropical diallel	P42×P49	CML206×TR0501	5.867	267.915	53.0569	48.6193	11.9182	137.742	81.4498	72.9716	1.2464	67.5781	-7.03389	-9.18511	1.64871	66.6513	-6.53145	-8.73522	0.622445	16.9283	24.3684	19.9086	-0.894106	44.9662	10.1569	0.798087	-0.137179	13.6604	4.70254	0.107964	1.45706	35.395	51.4431	50.7525	16.5916	489.208	57.887	55.4027	-1.06717	32.3277	26.9607	16.814	0.259641	139.04	135.547	102.64
Tropical diallel	P42×P50	CML206×TR0582	0.117434	250.558	52.8443	38.991	-4.5388	123.005	73.4244	70.3892	-0.88844	66.1874	-8.94706	-11.054	-0.301155	64.7665	-9.1746	-11.3161	0.535493	17.015	20.6466	20.5227	-0.631195	44.1175	19.1551	19.1397	0.040354	13.8394	10.4183	9.6697	1.63149	36.2076	42.774	32.9145	27.188	511.119	57.9744	49.3638	-0.0164672	31.2972	40.487	34.6058	-0.175916	138.359	143.641	115.738
Tropical diallel	P42×P51	CML206×Jiao51	-14.9562	256.851	43.1671	42.4816	-4.17628	132.873	59.5834	40.854	0.261317	65.2603	-10.2225	-12.2999	-0.0299735	62.8816	-11.8179	-13.897	-0.577917	16.1355	21.791	14.2929	-2.19537	43.1745	13.6953	10.938	-0.10269	13.8394	6.42344	2.05959	-0.888917	34.5147	49.9334	47.0032	-20.1246	482.203	57.8473	57.5413	-1.81848	28.83	34.1532	23.9946	-13.8244	127.046	146.074	136.077
Tropical diallel	P43×P44	CML312SR×CML312SRQ	-10.3071	224.248	45.2131	36.9539	0.905283	109.303	62.4436	53.4111	1.93016	62.9425	-5.05775	-6.10294	2.31821	62.8816	-3.12978	-4.21865	-0.119324	15.9019	15.2302	11.6913	-1.31923	43.5476	14.9091	10.6267	-0.0505723	13.2128	6.87793	-0.0390958	-1.26017	30.401	30.8458	20.2396	-21.281	398.629	33.4769	20.2252	-0.153126	34.3091	29.4294	21.2884	-7.3898	124.452	107.517	90.1872
Tropical diallel	P43×P45	CML312SR×CML330	2.68868	231.174	59.7936	59.3052	-0.697348	101.461	68.2447	60.2225	1.67283	63.406	-6.10068	-6.7799	-0.339649	59.1119	-10.6304	-11.2903	-0.109747	15.609	14.4246	9.63416	-0.288987	46.9629	18.6697	18.0433	0.731651	15.0031	12.4142	11.3439	-0.0171474	32.7541	37.3569	29.5464	20.8277	488.556	54.072	47.3468	0.315864	34.134	38.2685	38.0339	-2.49592	135.523	124.791	107.107
Tropical diallel	P43×P46	CML312SR×CML504	1.93351	248.7	52.6044	37.535	-5.13352	107.235	53.1786	39.8331	1.9301	66.6509	-7.99814	-14.393	1.05187	64.7665	-8.86025	-15.3097	0.670247	16.9091	17.8419	16.9325	-0.0126798	46.3561	14.403	11.2309	-0.40693	13.6157	0.80725	-1.30238	0.894229	35.2088	42.3551	39.2551	1.84973	489.249	48.3666	47.5556	1.61149	34.9868	36.6813	32.1952	-0.141741	140.867	122.731	115.273
Tropical diallel	P43×P47	CML312SR×CML85	-7.64673	225.177	40.7711	28.8157	-2.30665	100.729	45.1196	33.4218	-2.75988	57.3798	-15.6396	-16.8425	-0.310192	58.6407	-11.9973	-13.2779	-0.169455	15.5705	11.7136	9.3636	-0.773714	43.9515	8.27514	5.09591	-0.724197	13.2128	-5.52683	-10.4434	0.667804	34.1761	38.5894	35.1706	-12.4905	457.603	36.5477	35.1148	-0.0948615	32.0586	33.7555	29.6412	-1.8478	131.371	100.61	100.459
Tropical diallel	P43×P48	CML312SR×DTMA227B	-6.93697	229.95	50.6353	43.546	-3.72205	98.7899	59.3722	56.0038	-0.99609	56.9162	-9.088	-15.0929	0.462845	58.1695	-4.98827	-11.3961	-0.295786	15.4068	12.8594	8.21381	-0.422731	44.55	13.8323	13.1731	-0.259972	13.3024	4.70443	0.638771	-1.33886	32.3478	26.6372	25.3612	-29.672	432.678	32.6931	30.494	-0.930304	31.4774	30.7446	27.2912	-2.46121	133.1	109.53	103.404
Tropical diallel	P43×P49	CML312SR×TR0501	-4.05269	239.409	52.0395	40.9813	-3.91863	105.899	48.1549	32.9853	-1.24527	61.5518	-10.7963	-13.2697	-0.412792	61.468	-9.09662	-11.6673	-0.11248	15.8658	16.0521	11.4377	0.168694	46.5365	10.8346	4.31814	-0.117555	13.3919	-0.297188	-1.8597	-0.995527	31.7045	30.6098	25.3951	-17.49	425.021	31.5103	28.1848	0.483335	35.7787	36.5515	29.284	-0.650103	136.834	104.153	99.4251
Tropical diallel	P43×P50	CML312SR×TR0582	0.966646	232.821	59.0823	57.7472	5.08935	116.628	75.3952	67.4156	1.25549	64.7967	-6.0936	-8.69746	1.40694	63.3528	-6.30924	-8.95872	-0.623132	15.5288	9.64329	9.07071	0.423405	45.6796	19.6037	16.0427	-0.387622	13.1233	1.5848	-0.716206	-0.956596	32.3816	23.2999	18.8696	-24.8952	428.931	27.3232	25.3459	0.160942	33.3751	45.0051	34.965	-5.79646	131.442	102.89	100.869
Tropical diallel	P43×P51	CML312SR×Jiao51	4.55898	257.78	59.2918	44.3795	2.38187	123.426	56.5729	30.8395	-0.376058	61.0883	-11.468	-13.9228	-1.14908	58.6407	-13.2778	-15.7303	-0.199042	16.1868	21.6287	13.6924	0.204005	46.0814	17.7315	17.0634	0.185434	13.8394	3.36363	2.05959	0.315099	34.4808	44.1359	36.3757	11.5285	483.75	51.7293	45.8974	0.92993	33.4789	50.6077	35.3848	2.67262	142.247	138.565	117.381
Tropical diallel	P44×P45	CML312SRQ×CML330	5.27179	244.773	58.9602	49.4885	2.85721	114.84	78.6909	61.1823	0.774704	62.4789	-6.4513	-8.14293	0.573383	60.5256	-7.46063	-9.16872	-0.0425985	15.6154	18.2623	16.8569	-0.0465248	46.2167	21.28	16.1676	0.344023	14.1975	13.6635	5.36518	0.0603495	30.4517	39.709	35.8949	11.0429	426.243	49.9916	40.8492	-1.23031	33.0768	24.9784	16.932	7.22536	139.145	153.804	152.346
Tropical diallel	P44×P46	CML312SRQ×CML504	2.48962	260.271	51.0716	43.9341	-0.0924544	122.101	65.0714	59.2173	-0.358627	64.3332	-10.2835	-17.3699	-0.862499	63.3528	-9.91412	-17.1583	0.406775	16.5849	19.2153	14.6905	-0.309388	45.0707	15.4091	8.14657	-0.0337585	13.5709	7.26954	-1.62713	-1.00887	30.9258	36.3354	27.8852	-18.2392	416.631	40.3563	27.0432	1.83202	35.6963	30.3898	26.1924	2.43273	137.342	137.696	124.951
Tropical diallel	P44×P47	CML312SRQ×CML85	0.595384	244.435	44.4027	39.8321	2.34661	115.206	57.0156	52.5983	0.0503915	60.1611	-10.5803	-12.8118	0.602839	60.0544	-8.86652	-11.1872	-0.728227	14.951	10.7431	9.62454	0.483478	44.22	13.0213	5.73794	0.141374	13.6604	4.0371	-7.40953	-1.7262	29.4022	30.0377	22.3243	-23.8229	393.742	30.2899	16.2587	-1.02873	31.6137	22.7845	11.7597	-7.28403	119.835	99.655	82.8564
Tropical diallel	P44×P48	CML312SRQ×DTMA227B	2.48754	250.389	54.5935	52.9187	-0.404486	111.932	69.7258	57.1001	-1.89421	55.9891	-9.50213	-14.5956	-2.39392	55.8134	-7.7244	-13.0298	0.0474128	15.6893	18.7316	17.4094	0.252361	44.2364	17.433	13.6932	-0.021101	13.1233	10.752	7.64334	0.126841	31.4336	33.7929	21.8183	1.67831	411.499	40.369	28.3613	0.496555	33.3933	29.1571	18.0509	2.39997	131.862	127.118	114.026
Tropical diallel	P44×P49	CML312SRQ×TR0501	10.1017	264.579	58.6412	55.803	5.86213	125.505	66.3621	57.6047	0.174404	62.9425	-7.79468	-11.3101	1.91384	64.2953	-3.86626	-7.6043	0.233948	16.1515	22.0453	20.8685	0.956486	46.3356	14.3517	3.86779	0.0318165	13.1233	4.3489	-3.82809	0.368569	30.6887	38.0833	31.9106	10.3578	400.34	37.9217	27.1728	2.44726	38.2316	36.6348	35.1551	15.343	146.728	138.347	113.844
Tropical diallel	P44×P50	CML312SRQ×TR0582	1.14266	244.012	56.7541	49.0243	2.89161	124.255	76.3574	74.3962	1.28446	64.7967	-5.07844	-8.69746	0.90627	63.3528	-5.27547	-8.95872	-0.369833	15.7214	14.5391	11.5888	-0.461603	43.8059	19.2795	18.3289	0.119849	13.2128	9.53058	4.70422	-0.201799	30.7565	27.0246	12.904	2.54525	403.842	32.8583	18.0144	0.280371	33.9835	37.0537	20.1373	0.192516	131.331	121.395	104.78
Tropical diallel	P44×P51	CML312SRQ×Jiao51	1.9056	266.141	55.5095	49.0629	2.79093	133.659	61.4412	41.6876	-1.73778	59.6976	-12.5482	-15.8824	-0.236049	60.0544	-10.2072	-13.6987	-0.311613	16.0135	24.4142	19.8358	0.530526	45.4192	20.5584	16.7059	0.245405	13.4814	7.56216	-0.58051	-0.149004	31.6368	44.6388	40.2267	4.92044	424.614	48.5151	38.7262	-1.15964	31.8783	32.7795	12.6951	-1.91971	131.555	142.894	141.354
Tropical diallel	P45×P46	CML330×CML504	8.09486	259.807	59.8546	43.6772	1.70881	117.662	75.6492	53.4301	-0.152358	65.2603	-10.5253	-16.1791	-0.221855	62.8816	-12.1211	-17.7744	-0.138248	15.7374	14.4297	8.82988	0.806953	48.5721	19.2538	16.5481	0.211365	14.8241	8.72122	7.4571	-1.30645	31.7383	36.2429	31.245	-18.08	464.608	47.3619	41.673	1.00981	34.23	33.9443	29.3357	4.06032	145.147	149.834	137.735
Tropical diallel	P45×P47	CML330×CML85	-4.41098	233.359	46.2912	33.4958	0.950883	107.571	62.0259	42.4851	1.31306	62.1446	-9.29048	-9.93718	-0.869817	57.4699	-14.3865	-15.0093	-0.0332697	15.3435	15.0031	12.5025	0.10346	46.225	13.2899	10.5324	-0.381702	14.1454	0.221994	-4.12218	-0.870076	31.3684	35.0789	30.5044	-26.4071	438.976	36.9018	29.6148	-0.612482	31.3858	31.1783	27.3528	-0.740342	132.556	119.69	102.268
Tropical diallel	P45×P48	CML330×DTMA227B	-0.395523	241.436	58.6209	50.7166	3.24958	109.346	85.4353	80.2955	-1.68795	56.9162	-9.79688	-16.3213	-0.81078	56.2847	-8.79973	-15.5331	0.34024	15.6796	20.102	20.0101	0.720902	47.09	19.6802	18.3628	0.134543	14.287	11.3302	6.02954	0.506515	32.9233	36.5776	27.5917	12.2637	469.903	50.8027	46.5795	-0.113655	32.139	33.7253	30.4088	-1.83775	133.802	129.209	117.174
Tropical diallel	P45×P49	CML330×TR0501	-1.49154	246.916	57.2495	45.4017	-3.6257	109.777	60.3539	37.855	0.380673	63.8696	-8.09252	-10.0038	-1.21522	60.0544	-11.8287	-13.6987	-0.00286474	15.6122	19.4032	19.1303	-0.239573	47.5246	12.6247	6.5331	-0.17056	13.929	2.72035	2.07636	1.42539	32.8556	43.8731	41.2247	20.8617	458.662	48.5729	45.6995	-2.16725	32.973	26.0452	19.1457	4.73836	142.301	129.972	107.392
Tropical diallel	P45×P50	CML330×TR0582	-6.6393	230.161	57.7424	55.9445	-4.82952	110.294	73.76	58.3235	1.49073	65.7238	-5.42435	-7.39111	1.54691	62.8816	-7.67782	-9.63586	0.382053	16.1708	19.1924	14.7788	-0.335462	46.3171	20.6097	16.42	-0.321227	13.7798	5.6177	2.26525	0.730824	32.7992	32.1229	20.4026	4.08906	453.204	40.5675	32.4394	0.769461	33.8285	47.2433	37.2642	4.954	142.27	138.562	121.837
Tropical diallel	P45×P51	CML330×Jiao51	-3.51137	254.655	57.7932	42.6293	-6.7938	117.835	55.4345	24.913	-0.140815	62.0154	-10.7607	-12.6165	-0.0667048	59.1119	-13.2125	-15.0531	-0.0284566	15.9942	25.8165	22.6054	-0.636832	46.6369	18.5149	17.2239	-0.404671	13.8394	2.38256	2.05959	-0.378781	32.5171	44.6186	44.1286	-16.9948	450.516	48.0249	47.189	-1.26275	31.1311	40.3107	26.3191	-8.37972	131.272	140.964	138.068
Tropical diallel	P46×P47	CML504×CML85	6.62795	262.678	47.7246	45.2652	1.73691	118.567	55.8205	54.6101	0.977529	64.7967	-11.7561	-16.7745	1.6925	64.2953	-10.759	-15.9258	-0.464356	15.4325	9.84401	6.72125	0.275026	45.5135	9.01967	8.83093	-0.170284	14.108	-1.16619	-4.37568	-1.3663	32.4155	34.4519	34.0454	-28.7536	456.3	36.8992	34.7299	-0.271319	31.2842	25.9595	18.2052	-4.86537	131.421	107.634	100.536
Tropical diallel	P46×P48	CML504×DTMA227B	9.44931	269.562	58.0921	49.072	5.75061	122.057	77.7495	59.1611	-0.0399772	61.5518	-9.50589	-20.9423	1.52304	62.8816	-5.63298	-17.7744	0.423613	16.2831	18.3114	12.6035	0.837309	46.3233	14.9688	11.1522	0.562441	14.4661	11.3341	4.86202	1.53634	35.4965	42.0253	37.5637	44.3177	521.627	60.8662	59.0597	0.702068	32.5119	30.3385	22.844	7.64203	146.271	138.49	137.414
Tropical diallel	P46×P49	CML504×TR0501	4.8165	271.505	54.8611	50.1463	4.30443	127.917	63.6605	60.6348	-1.67986	64.7967	-12.9229	-16.7745	-1.2374	64.2953	-11.9613	-15.9258	-0.362451	15.7727	14.4372	9.07406	-0.0760661	46.805	8.48837	4.92002	0.436279	14.287	4.12888	3.5639	-0.0840305	32.8895	38.6361	36.0055	11.2104	468.681	45.8375	42.9149	-0.296923	34.4005	27.0786	24.3039	-0.766066	139.786	115.605	103.727
Tropical diallel	P46×P50	CML504×TR0582	-1.22867	253.852	54.5909	40.3842	0.0413081	125.375	71.3339	63.4875	1.2845	68.5052	-7.93922	-12.0113	1.99603	67.5938	-7.44467	-11.6126	0.0930671	16.4019	14.9025	13.425	-0.766355	45.0031	14.372	7.98436	-0.728909	13.1233	-0.63577	-4.8717	0.395101	34.0068	32.2611	24.8356	-15.9071	452.879	35.159	32.3442	-1.2516	31.3646	31.3143	18.5091	-8.43152	131.874	110.684	105.627
Tropical diallel	P46×P51	CML504×Jiao51	3.20826	279.655	55.6365	54.6537	6.26383	141.102	65.0113	49.5782	0.116454	65.2603	-12.2999	-16.1791	-0.088886	63.3528	-13.2518	-17.1583	0.790057	17.3328	29.1568	19.8625	0.625575	47.0162	16.6753	12.8148	-0.245352	13.7499	0.527554	-0.329587	1.7345	36.1737	54.7748	49.5864	21.0053	508.187	60.3052	54.9614	0.943573	32.8946	42.4141	24.29	4.97055	147.612	157.008	141.772
Tropical diallel	P47×P48	CML85×DTMA227B	-6.25443	239.916	43.2343	37.2471	-3.78882	103.185	51.5808	36.6749	-0.0944585	56.9162	-10.4947	-17.5144	-0.781424	55.8134	-10.2786	-17.4591	-0.342188	15.0184	12.4821	10.1187	-0.270225	43.5722	7.94691	4.18893	0.289974	14.108	4.71689	-4.37568	-1.28008	31.8738	27.9046	23.5243	-13.6419	446.362	35.4139	31.7957	-0.0781803	30.5098	30.8597	30.2591	-5.78853	125.05	96.7046	90.8147
Tropical diallel	P47×P49	CML85×TR0501	-1.21634	251.53	45.9741	43.8908	-2.3912	111.889	44.2524	40.5063	-0.34364	61.5518	-12.0504	-13.2697	-1.65706	59.1119	-13.8348	-15.0531	0.402917	16.0392	19.9482	17.6035	0.7762	46.0137	6.47555	3.14621	0.0742915	13.8394	-2.53682	-6.19626	1.16234	33.3296	40.9254	38.6638	22.7323	462.898	41.6721	36.6781	0.515028	33.9906	33.6058	22.8228	4.64137	137.403	104.851	100.254
Tropical diallel	P47×P50	CML85×TR0582	-1.05361	240.085	48.9373	37.3438	2.73888	118.74	63.5977	57.2782	-0.160683	62.4789	-10.7257	-11.9634	-0.77963	60.0544	-12.461	-13.6987	0.986765	16.7967	21.1576	19.2213	-0.00838877	44.1175	11.9153	5.49284	-0.464176	13.3024	-2.80548	-9.83607	2.11558	34.921	36.2039	28.1915	17.5264	469.007	37.7659	37.0573	1.06504	32.4594	45.8466	39.8666	-0.516784	131.999	103.595	101.417
Tropical diallel	P47×P51	CML85×Jiao51	1.86313	264.368	49.6355	48.0695	0.602302	126.108	48.5104	33.6828	0.989073	61.5518	-12.0504	-13.2697	1.37645	60.0544	-12.461	-13.6987	0.906955	16.9508	30.3019	24.2876	0.313441	45.0605	11.6215	7.74773	-0.51772	13.3919	-5.40336	-9.22943	1.45727	35.0902	50.61	45.9885	7.9277	477.804	48.212	41.0794	0.320224	31.0494	44.6273	33.7909	8.24199	143.093	139.787	118.347
Tropical diallel	P48×P49	DTMA227B×TR0501	0.718115	257.526	56.0725	51.65	2.6998	116.456	66.0326	46.2419	-0.434046	59.234	-8.26911	-16.5356	0.0583765	59.5831	-5.71003	-14.376	-0.352613	15.2463	16.5154	16.3381	0.598403	46.0834	10.3547	3.30249	-0.267184	13.1233	1.5848	-3.82809	-1.14901	31.1966	27.1555	20.8998	-24.3434	408.078	28.4519	27.2941	0.929416	34.6593	35.6611	25.2391	-7.01993	128.085	96.7136	86.6734
Tropical diallel	P48×P50	DTMA227B×TR0582	0.247346	245.448	59.494	53.221	-3.17912	112.298	72.352	61.1996	0.67611	61.0883	-5.3975	-13.9228	-0.00669228	59.5831	-5.71003	-14.376	0.0515346	15.8241	16.5511	12.3179	-0.239506	44.1339	16.2504	13.4298	0.089449	13.4814	8.67439	6.83274	-0.669884	32.3139	21.8359	18.6211	-5.5199	438.217	32.2366	28.0595	-1.35868	30.29	35.4448	29.3207	-2.50829	132.35	110.509	106.369
Tropical diallel	P48×P51	DTMA227B×Jiao51	-3.84622	262.721	55.1186	47.147	1.169	126.151	62.7941	33.7285	-0.491933	57.8434	-10.4226	-18.4951	-0.677811	56.7559	-10.1841	-18.4388	-0.172775	15.8337	24.4561	21.1892	-0.708977	44.2856	13.8063	13.793	0.0359052	13.5709	5.39857	0.0795153	0.940411	34.7517	43.7064	34.6773	15.1014	477.234	52.3105	48.8663	-1.87199	29.1115	34.9251	24.2892	0.382684	137.577	138.382	123.302
Tropical diallel	P49×P50	TR0501×TR0582	0.935634	252.712	59.235	48.8149	1.3424	124.126	66.2809	55.8733	0.890429	66.1874	-6.73787	-6.73787	1.00257	64.7665	-6.92716	-6.92716	-0.0732597	15.975	17.4899	13.389	-0.193481	45.575	11.6615	2.1628	0.500366	13.8394	5.3835	1.41974	-1.47766	30.5195	20.8549	12.034	-8.57006	415.328	26.432	21.3707	-0.777168	33.7591	37.8519	21.9863	1.07422	137.856	107.697	100.914
Tropical diallel	P49×P51	TR0501×Jiao51	3.13447	276.277	58.616	54.7396	-3.76728	128.521	47.7538	36.2407	0.649485	63.8696	-10.0038	-10.0038	-0.611049	60.9968	-12.3444	-12.3444	0.56273	16.8449	32.197	28.5363	0.386648	46.7763	12.0017	4.85568	-0.000677279	13.4814	-0.893141	-1.20381	1.04674	33.8714	47.8263	45.591	19.0564	461.35	48.6116	46.5534	0.93742	34.8085	46.8583	25.7782	2.25609	141.373	130.946	106.04
Tropical diallel	P50×P51	TR0582×Jiao51	-3.9665	257.569	57.9524	44.2613	-1.9981	132.011	60.9912	39.9405	-1.02176	62.9425	-11.3101	-11.3101	-1.14732	60.5256	-13.0216	-13.0216	0.465278	16.9211	27.8606	20.1043	-0.0228406	45.2552	19.1896	16.2844	-0.673545	12.81	-2.13637	-5.53181	1.17037	34.6332	39.0823	27.135	-2.35917	451.25	39.2148	31.8681	0.442527	32.2324	57.1009	51.2953	6.33713	145.208	146.223	126.418
